# Supplementary material for: Phomopsischalins A–C, polycyclic-fused cytochalasins from the endophytic fungus Phomopsis sp. shj2 and their abilities to induce lysosomal function
Source: Royal Society of Chemistry journal article supplement (doi:10.1039/d3qo00252g), 2023-01-01
Supplement: d3qo00252g1.pdf [file d3qo00252g1.pdf]

## Supplementary Information of

# Phomopsischalins A–C, Polycyclic-fused Cytochalasins from the Endophytic Fungus *Phomopsis* sp. shj2 and Their Abilities to Induce Lysosomal Function

Rong Chen,<sup>‡a</sup> Li-Jing Guo,<sup>‡b</sup> Xue-Dan Li,<sup>b</sup> Xing-Ren Li,<sup>a</sup> Kun Hu,<sup>a</sup> Jian-Wei Tang,<sup>a</sup> Zhen-Nan Ye,<sup>\*b</sup>  
Bing-Chao Yan,<sup>\*a</sup> Pema-Tenzin Puno<sup>\*a</sup>

<sup>a</sup> State Key Laboratory of Phytochemistry and Plant Resources in West China, Yunnan Key Laboratory of Natural Medicinal Chemistry, Kunming Institute of Botany, University of Chinese Academy of Sciences, Chinese Academy of Sciences, Kunming 650201, Yunnan, China

<sup>b</sup> Guangdong Provincial Key Laboratory of Autophagy and Major Chronic Non-communicable Diseases, Affiliated Hospital of Guangdong Medical University, Zhanjiang 524001, China

## **Contents of Supplementary Information**

|                                                          |          |
|----------------------------------------------------------|----------|
| <b>1. General experimental procedures .....</b>          | <b>3</b> |
| <b>2. Fungal Material.....</b>                           | <b>3</b> |
| <b>3. Bioassay.....</b>                                  | <b>4</b> |
| <b>4. NMR, HRESIMS, CD, UV, OR, and IR spectra .....</b> | <b>6</b> |

## 1. General experimental procedures

CD spectra were measured on an Applied Photophysics Chirascan spectrophotometer. Optical rotations were measured with a JASCO P-1020 polarimeter. UV spectra were obtained using a Shimadzu UV-2401A spectrophotometer. Scanning IR spectroscopy was performed using a Bruker Tensor-27 spectrophotometer with KBr pellets. NMR spectra were recorded on Bruker AV III 500 and AV III-600 spectrometers. ESIMS and HRESIMS experiments were performed on a Bruker HCT/Esquire spectrometer and a Waters AutoSpec Premier P776 spectrometer. Column chromatography (CC) was performed with silica gel (100–200 mesh, Qingdao Marine Chemical, Inc., Qingdao, People's Republic of China), Lichroprep RP-18 gel (40–63  $\mu$ m, Merck, Darmstadt, Germany). Preparative HPLC and semi-preparative HPLC were performed on an Agilent 1200 liquid chromatograph with a Zorbax SB-C<sub>18</sub> (9.4 mm  $\times$  25 cm) column. Fractions were monitored by TLC, and spots were visualized by heating silica gel plates sprayed with 10% H<sub>2</sub>SO<sub>4</sub> in EtOH. Petroleum ether (PE, 60–90 °C), EtOAc, CHCl<sub>3</sub>, acetone, MeOH, and EtOH were of analytical grade and obtained from Sinopharm Chemical Reagent Co. Ltd, China. All solvents were distilled before use.

## 2. Fungal Material

The culture of *Phomopsis* sp. shj2 was isolated from the stems of *Isodon eriocalyx* var. *laxiflora* collected from Kunming Botanical Garden, Kunming, People's Republic of China, in December 2012. The isolate was identified based on sequence (GenBank Accession No. KU533636, CGTAACAAGGTCTCCGTTGGTGAACCAGCGGAGGGATCATTGCTGGAACGCGCCCCCTG GCGCACCCAGAAACCCTTTGTGAACTTATACCTTACTGTTGCCTCGGCGCAGGCCGTCC CCCATGGGGTCCCTCTGGAGACGGAGGAGCAGCCGGCCGGTGGCCAAATTA ACTCTGT TTTTACTGAAACTCTGAGTACAAAACATAAATGAATCAAACTTTCAACAACGGAT CTCTTGTTCTGGCATCGATGAAGAACGCAGCGAAATGCGATAAGTAATGTGAATTGC AGAATTCAGTGAATCATCGAATCTTTGAACGCACATTGCGCCCTCTGGTATTCCGGAGG GCATGCCTGTTGAGCGTCATTTCAACCCTCAAGCCTGGCTTGGTGTGGGGCACTGC CTGTGAAAGGGCAGGCCCTGAAATATAGTGGCGAGCTCGCCAGGACTCCGAGCGTAGT AGTTAAACCCTCGCTTTGGAAGGCCTGGCGGTGCCCTGCCGTTAAACCCCAACTTTTG

AAAATTTGACCTCGGATCAGGTAGGAATACCCGCTGAACTTAAGCATATC) analysis of the ITS region of the rDNA. The fungal strain was cultured on slants of potato dextrose agar at 25 °C for 7 days. Agar plugs were cut into small pieces (about 0.5 × 0.5 × 0.5 cm<sup>3</sup>) under aseptic conditions, and 15 pieces were used to inoculate three Erlenmeyer flasks (250 mL), each containing 50 mL of media (0.4% glucose, 1% malt extract, and 0.4% yeast extract); the final pH of the media was adjusted to 6.5, and the flasks were sterilized by autoclave. Three flasks of the inoculated media were incubated at 28 °C on a rotary shaker at 180 rpm for five days to prepare the seed culture. Fermentation was carried out in 125 Fernbach flasks (500 mL), each containing 80 g of rice. Spore inoculum was prepared in sterile, distilled H<sub>2</sub>O to give a final spore/cell suspension of 1 × 10<sup>6</sup>/mL. Distilled H<sub>2</sub>O (120 mL) was added to each flask, and the contents were soaked overnight before autoclaving at 15 psi for 30 min. After cooling to room temperature, each flask was inoculated with 5.0 mL of the spore inoculum and incubated at 28 °C for 42 days.

### 3. Bioassay

#### 3.1 Antimicrobial activity

**Table S1.** Anti-migratory activities against MDA-MB-231 in vitro of compounds 1–3 (IC<sub>50</sub> in μM)

| Compounds        | 1   | 2   | 3   | 4    | Positive control<br>(cytochalasins D) |
|------------------|-----|-----|-----|------|---------------------------------------|
| IC <sub>50</sub> | >25 | >25 | >25 | 3.58 | 0.2                                   |

**Table S2.** The inhibitory ratio of tested sample against six strains of bacteria and *C. albicans*

| Sample | Conc.<br>(μM) | 抑制率 (%)                           |                                                             |                                                             |                                    |                                                                               |                        |
|--------|---------------|-----------------------------------|-------------------------------------------------------------|-------------------------------------------------------------|------------------------------------|-------------------------------------------------------------------------------|------------------------|
|        |               | <i>Esch<br/>erichi<br/>a coli</i> | <i>Staphylo<br/>coccus<br/>aureus<br/>subsp.<br/>aureus</i> | <i>Salmonel<br/>la<br/>enterica<br/>subsp.<br/>enterica</i> | <i>Pseudomona<br/>s aeruginosa</i> | Methicilli<br>n-resistant<br><i>Staphyloc<br/>occus<br/>aureus<br/>(MRSA)</i> | <i>C.<br/>albicans</i> |
| 1      | 100           | 1.351<br>±1.80<br>6               | -<br>43.155±2<br>.445                                       | -<br>12.091±0                                               | -<br>11.295±3.26<br>1              | -<br>12.302±1.<br>371                                                         | -<br>2.859±1<br>.183   |
| 2      | 100           | 9.582<br>±2.35<br>3               | 27.261±0<br>.26                                             | -8±0.579                                                    | -<br>29.966±0.55<br>7              | -<br>5.443±0.7<br>39                                                          | -<br>1.443±0<br>.438   |

|                     |     |                     |                  |                  |                   |                  |                   |
|---------------------|-----|---------------------|------------------|------------------|-------------------|------------------|-------------------|
| <b>3</b>            | 100 | 3.201<br>±0.23<br>6 | 3.39±1.0<br>39   | 18.91±1.<br>35   | 6.796±0.239       | 16.328±2.<br>636 | 5.885±0<br>.492   |
| <b>4</b>            | 100 | 3.793<br>±0.70<br>7 | 99.756±0<br>.001 | 8.75±0.0<br>97   | 15.307±2.38<br>6  | 99.951±0.<br>087 | 2.833±0<br>.219   |
| Penicillin G Sodium | 14  |                     | 99.878±0<br>.212 |                  |                   |                  |                   |
|                     | 28  |                     |                  | 99.864±0<br>.137 |                   |                  |                   |
| Ceftazidime         | 4   | 99.96<br>4±0        |                  |                  | 100.225±0.0<br>01 |                  |                   |
| Vancomycin          | 0.7 |                     |                  |                  |                   | 99.901±0.<br>15  |                   |
| Amphoteric in B     | 0.5 |                     |                  |                  |                   |                  | 100.078<br>±0.078 |

**Table S3.** The MIC<sub>50</sub> of the tested samples against *Staphylococcus aureus* subsp. *aureus*

| Sample              | Conc.<br>( $\mu\text{g/mL}$ ) | Inhibitory ratio (%) | MIC <sub>50</sub> ( $\mu\text{g/mL}$ ) |
|---------------------|-------------------------------|----------------------|----------------------------------------|
| Penicillin G Sodium | 14                            | 100.237±0.001        | 2.629±0.003                            |
|                     | 7                             | 100.592±0            |                                        |
|                     | 3.5                           | 100.119±0.205        |                                        |
|                     | 1.75                          | -21.159±0.739        |                                        |
|                     | 0.875                         | 27.542±1.003         |                                        |
| <b>4</b>            | 100                           | 100.237±0.355        | 53.279±1.248                           |
|                     | 50                            | 44.918±2.006         |                                        |
|                     | 25                            | 38.889±1.505         |                                        |
|                     | 12.5                          | 21.336±3.762         |                                        |
|                     | 6.25                          | -69.268±4.012        |                                        |

**Table S4.** The MIC<sub>50</sub> of the tested samples against MRSA

| Sample     | Conc.<br>( $\mu\text{g/mL}$ ) | Inhibitory ratio (%) | MIC <sub>50</sub> ( $\mu\text{g/mL}$ ) |
|------------|-------------------------------|----------------------|----------------------------------------|
| Vancomycin | 0.7                           | 99.879±0.105         | 0.468±0.001                            |
|            | 0.35                          | 14.273±0.129         |                                        |
|            | 0.175                         | 5.001±0.9            |                                        |
|            | 0.0875                        | -0.455±0.129         |                                        |
|            | 0.04375                       | -17.637±0.772        |                                        |
| <b>4</b>   | 100                           | 100.091±0.129        | 36.791±0.27                            |
|            | 50                            | 100±0                |                                        |
|            | 25                            | -13±2.7              |                                        |
|            | 12.5                          | -36.455±0.9          |                                        |
|            | 6.25                          | -68.91±2.058         |                                        |

#### 4. NMR, HRESIMS, CD, UV, OR, and IR spectra

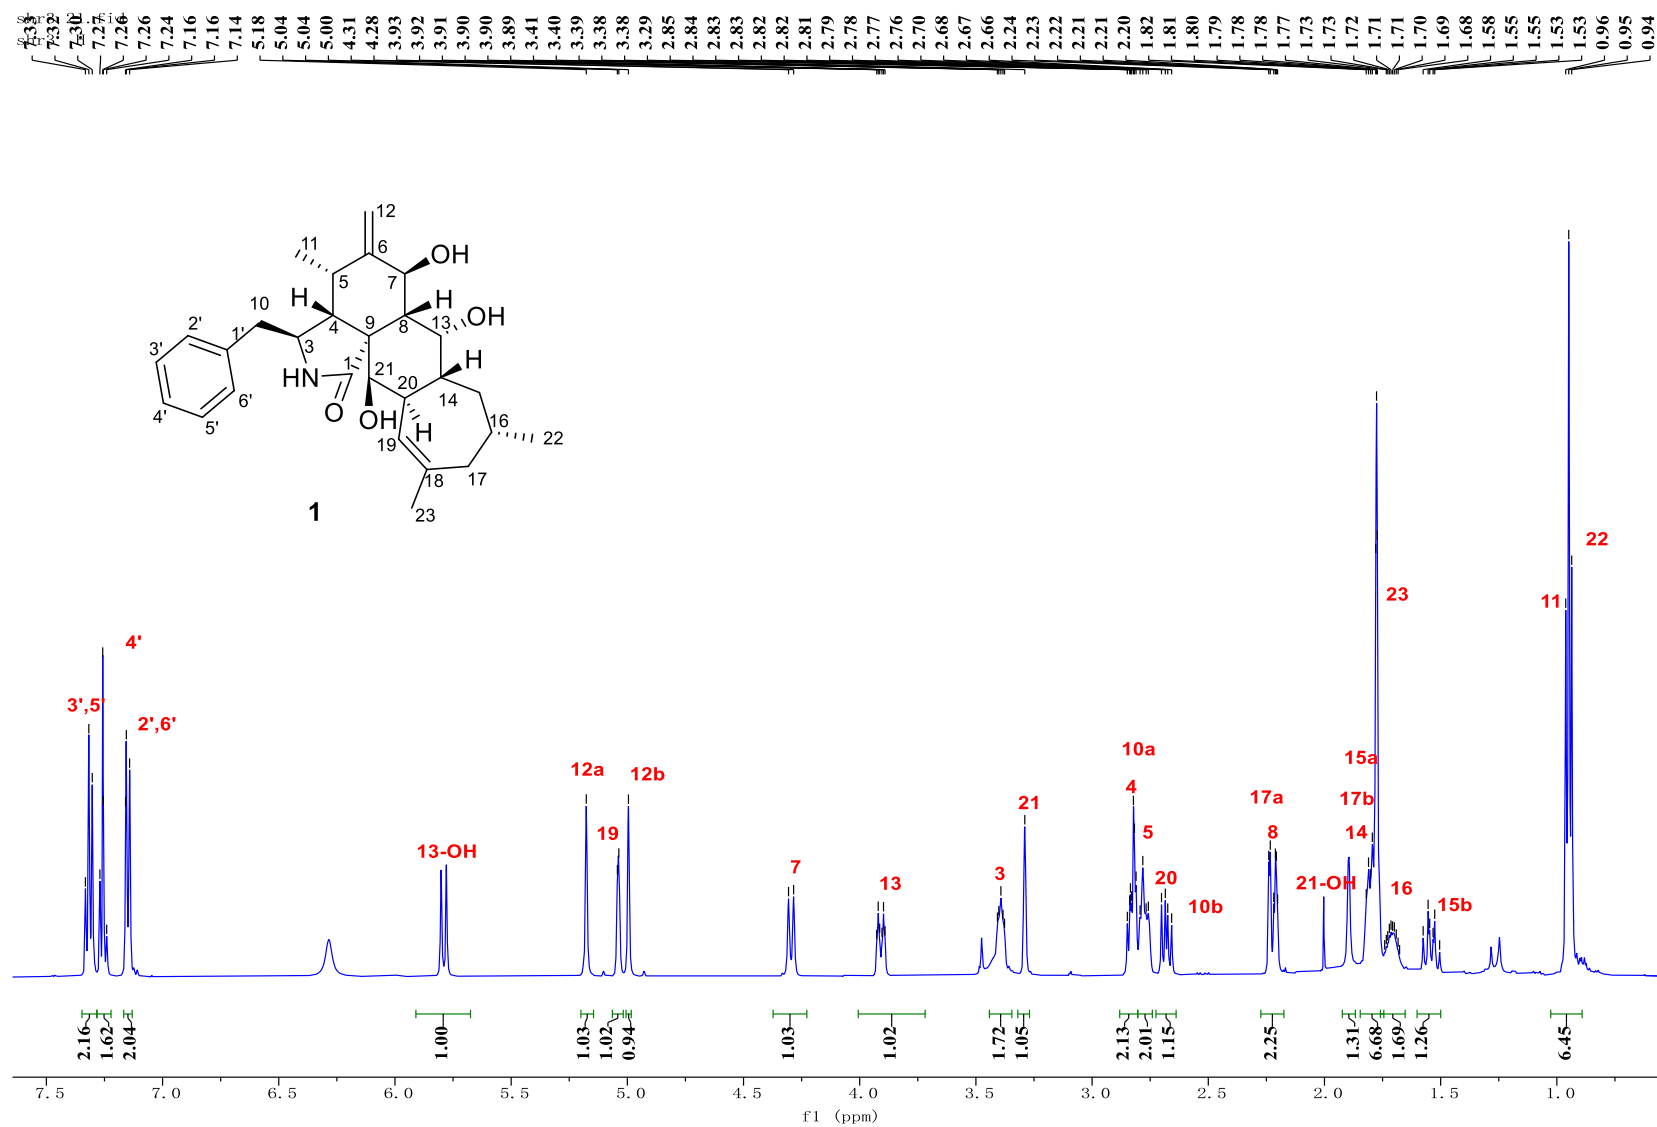

Figure S7. <sup>1</sup>H NMR spectrum of **1** (500 MHz, CDCl<sub>3</sub>).

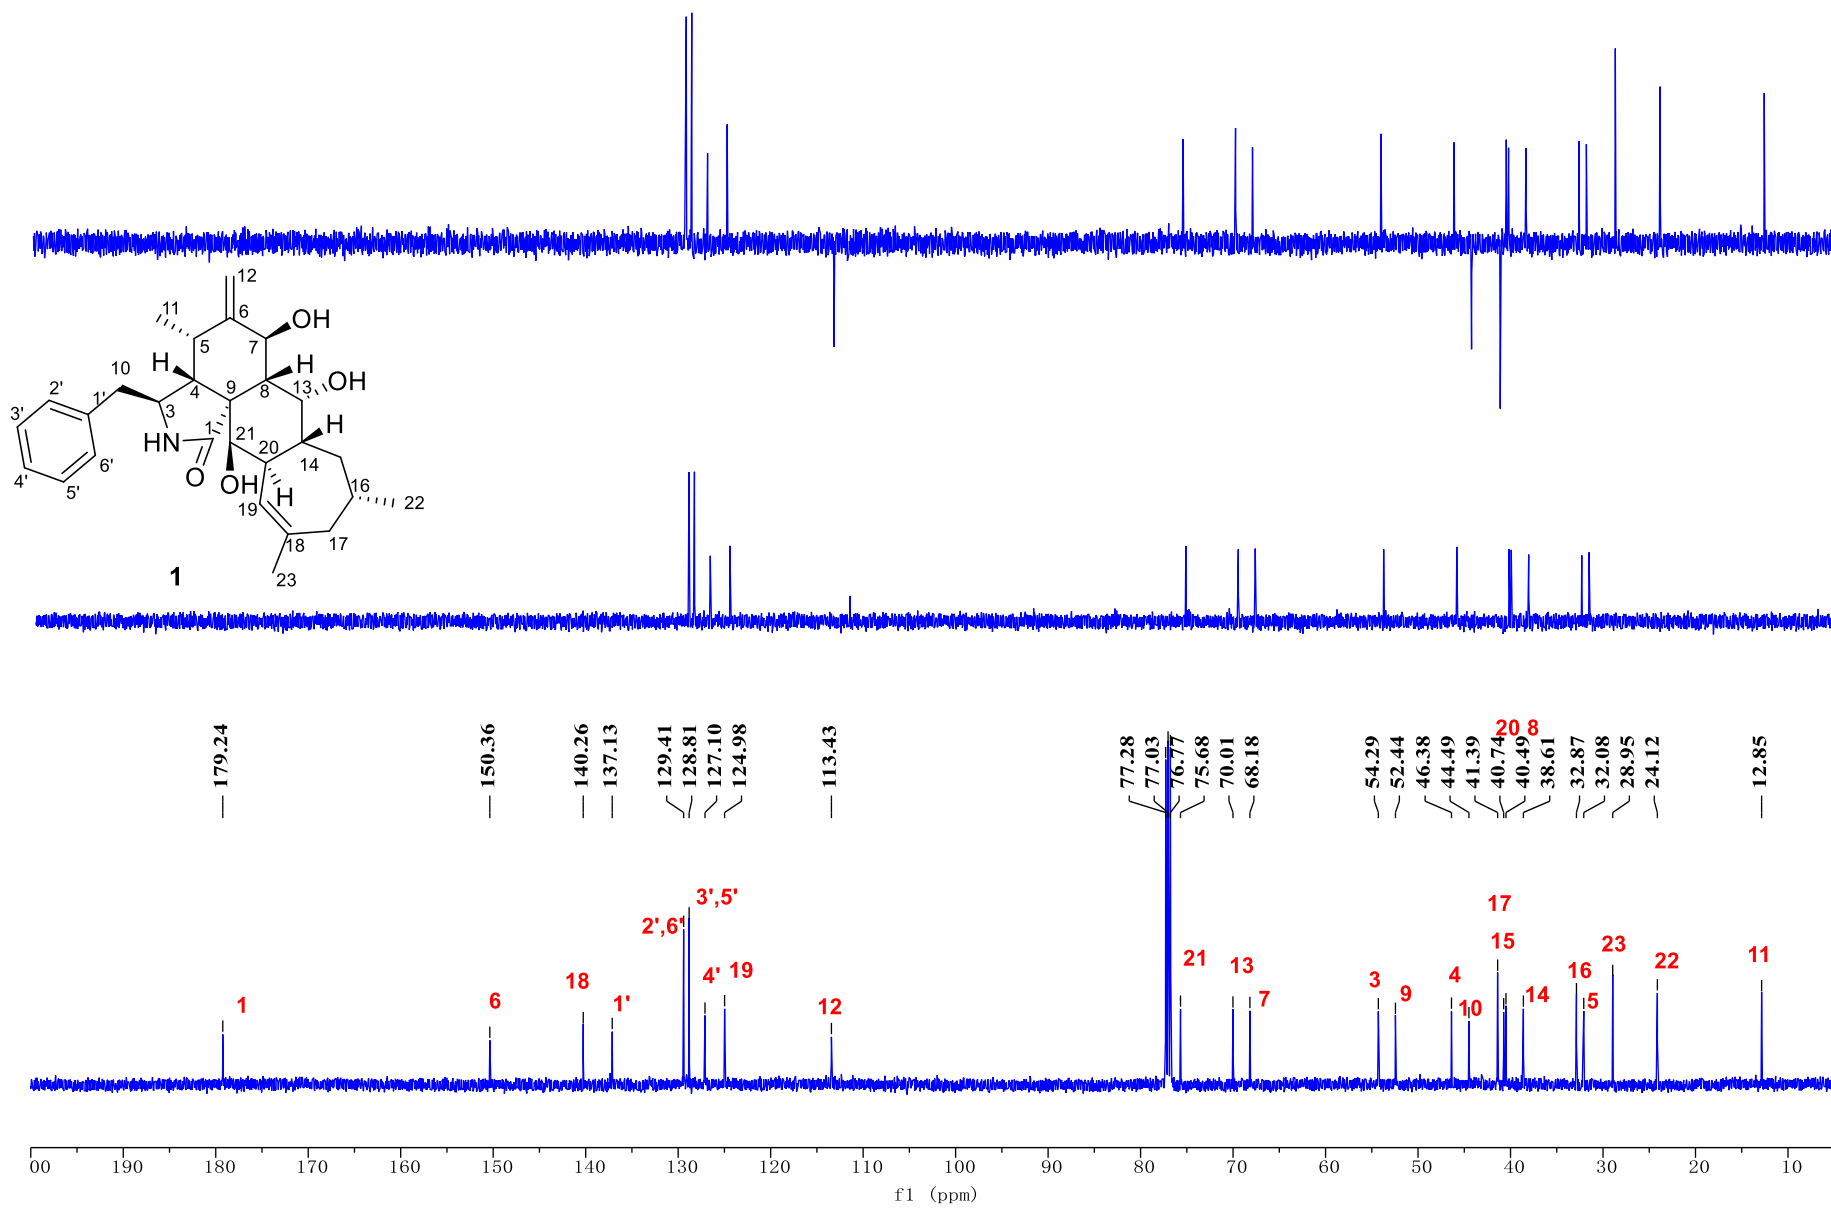

Figure S8.  $^{13}\text{C}$  NMR spectrum of **1** (125 MHz,  $\text{CDCl}_3$ ).

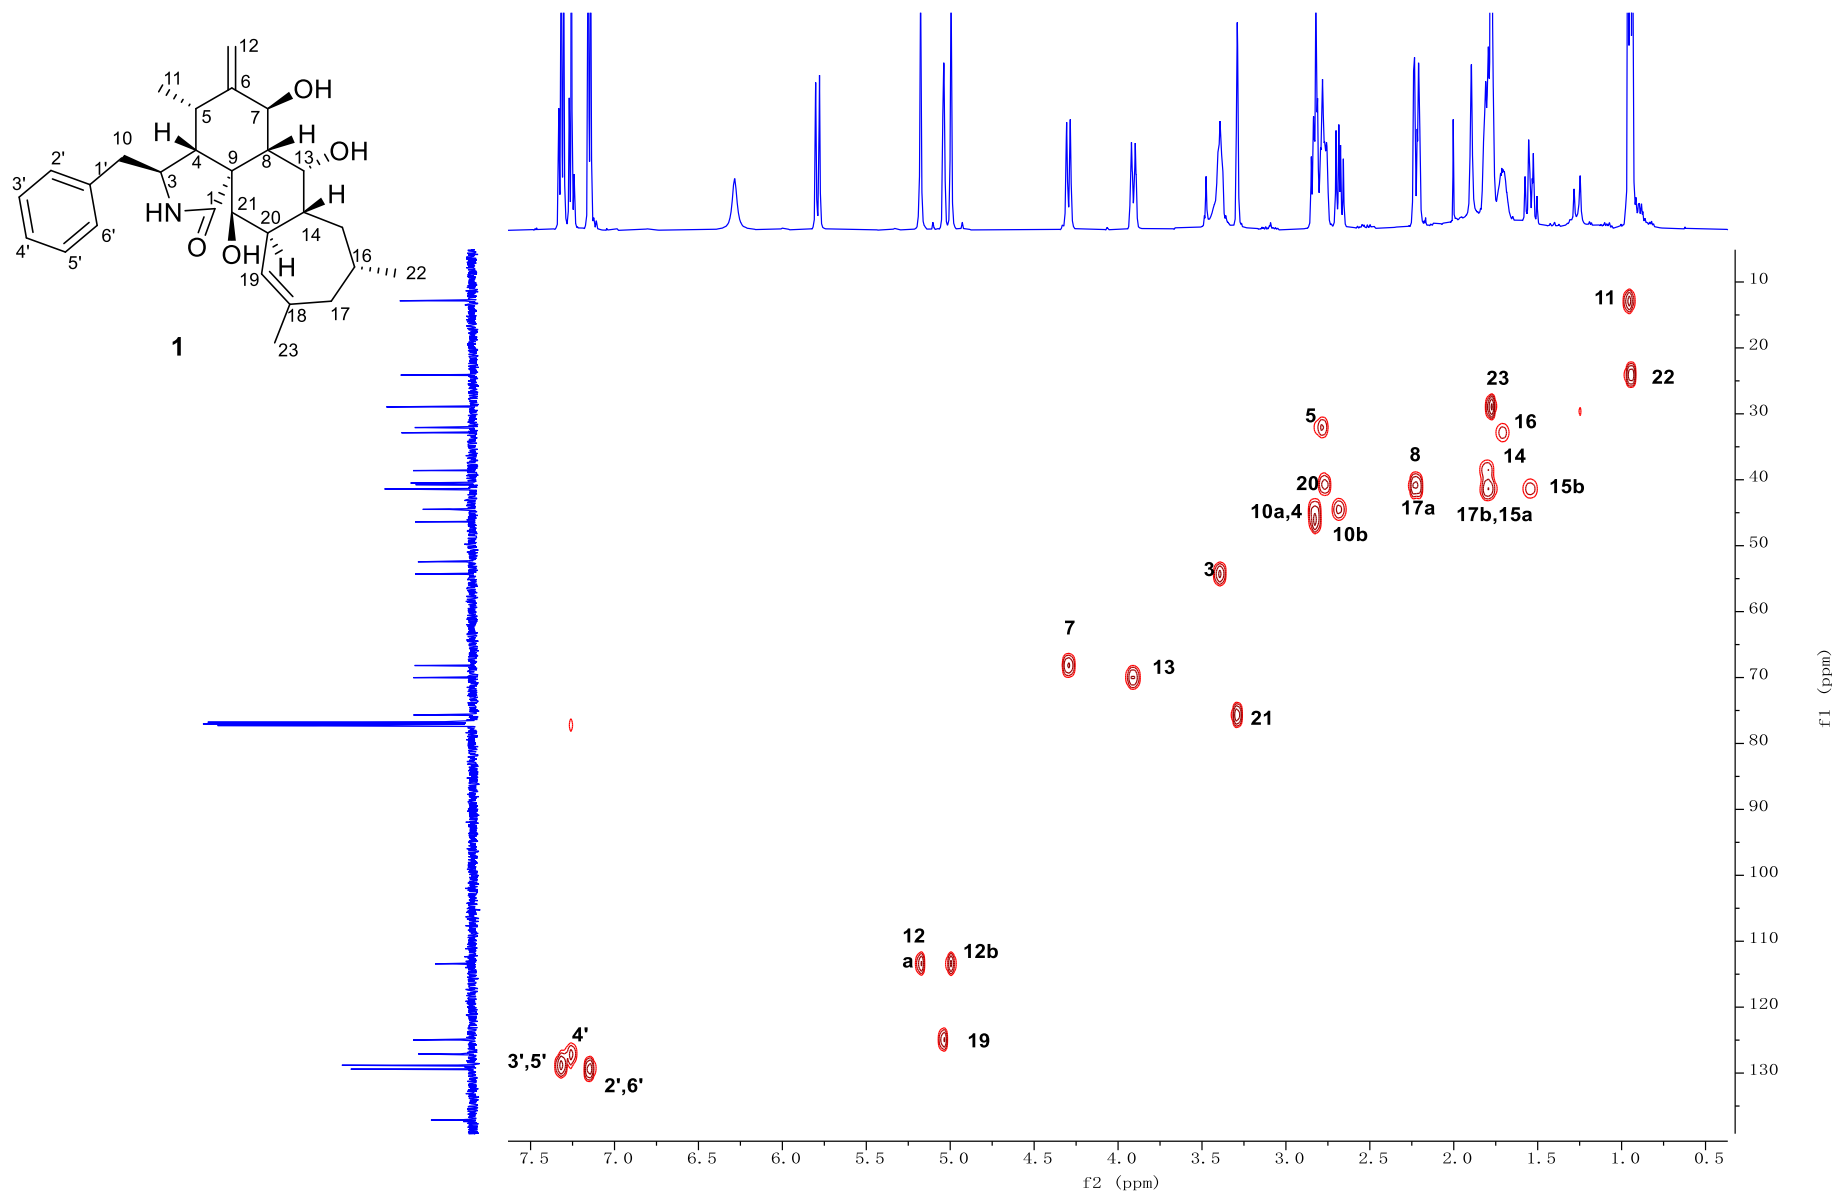

**Figure S9.** HSQC spectrum of **1** (CDCl<sub>3</sub>).

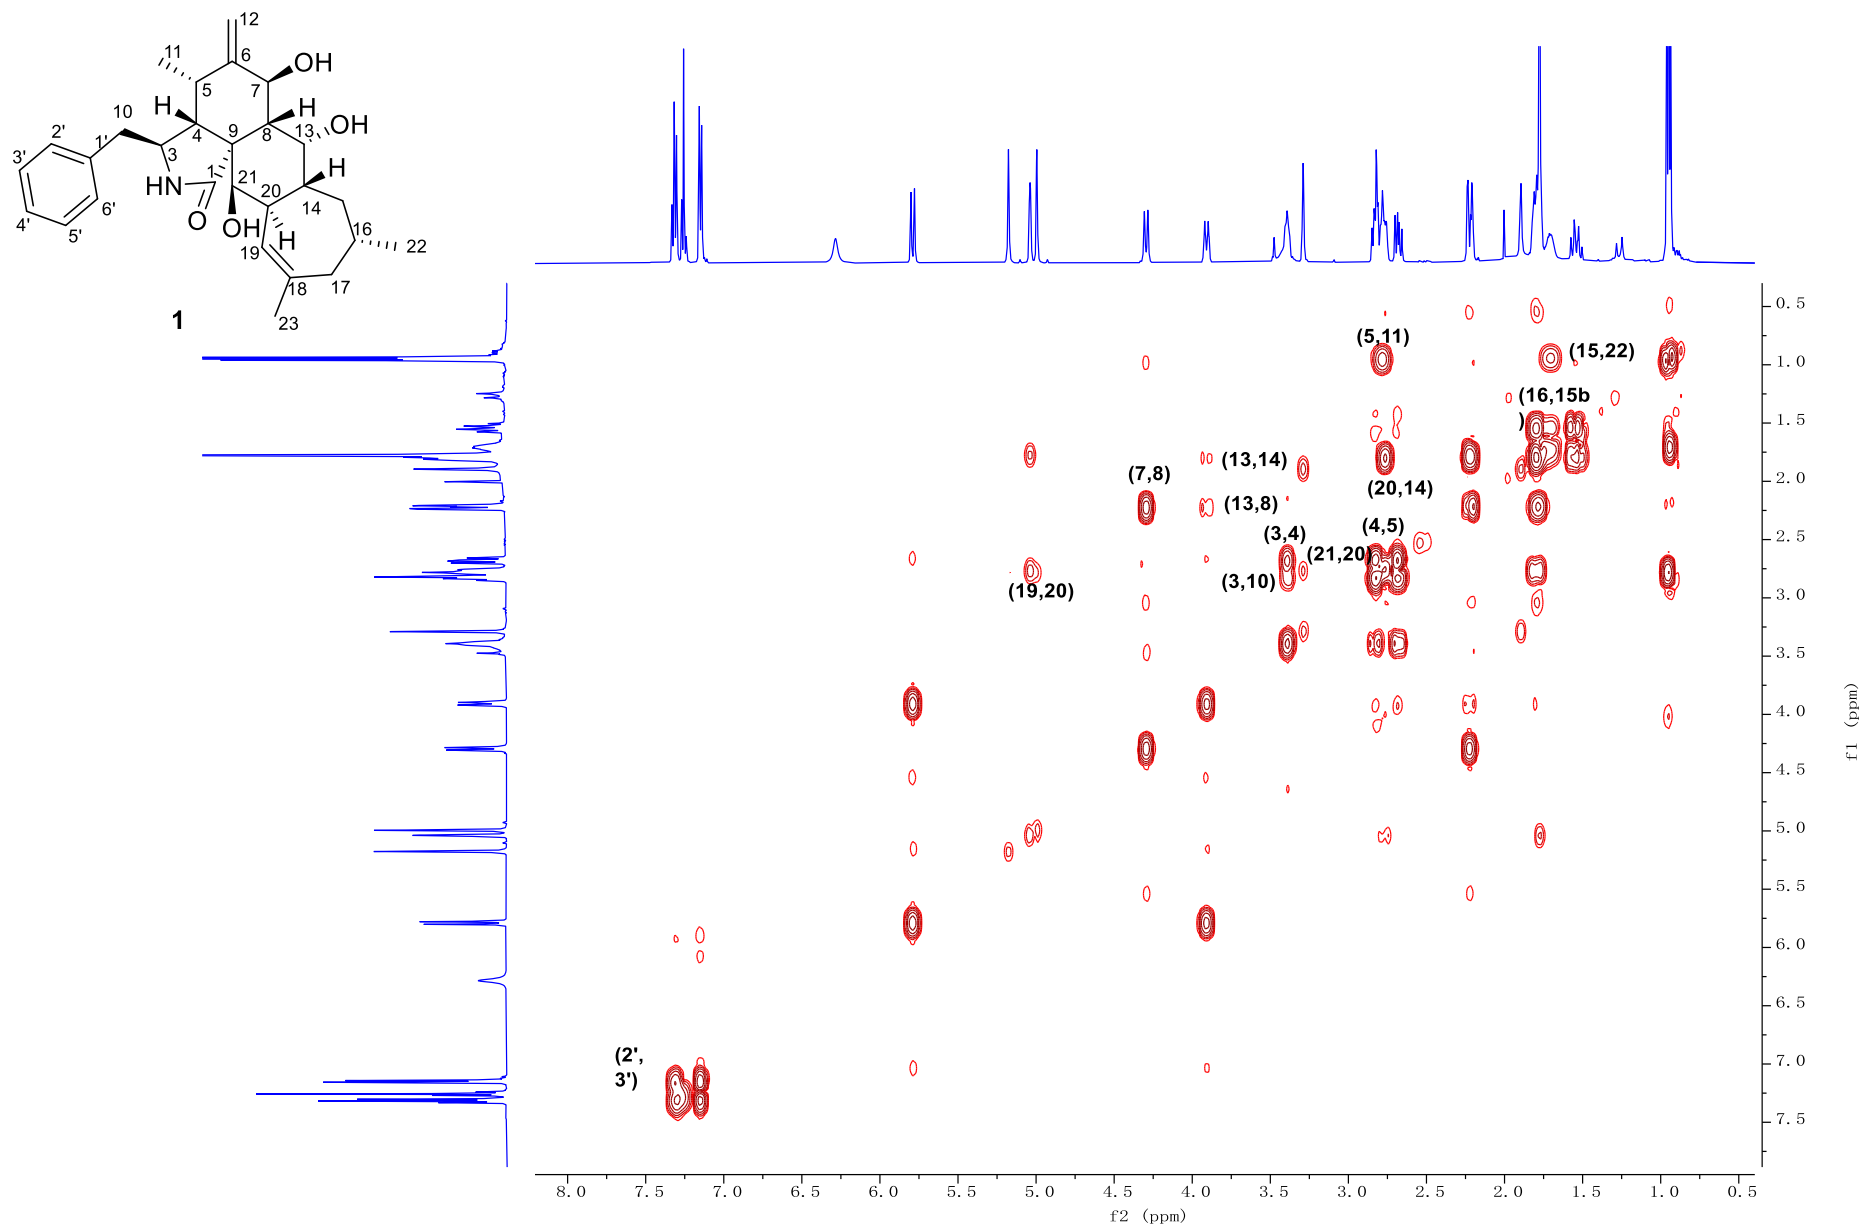

**Figure S10.**  $^1\text{H}$ - $^1\text{H}$  COSY spectrum of **1** ( $\text{CDCl}_3$ ).

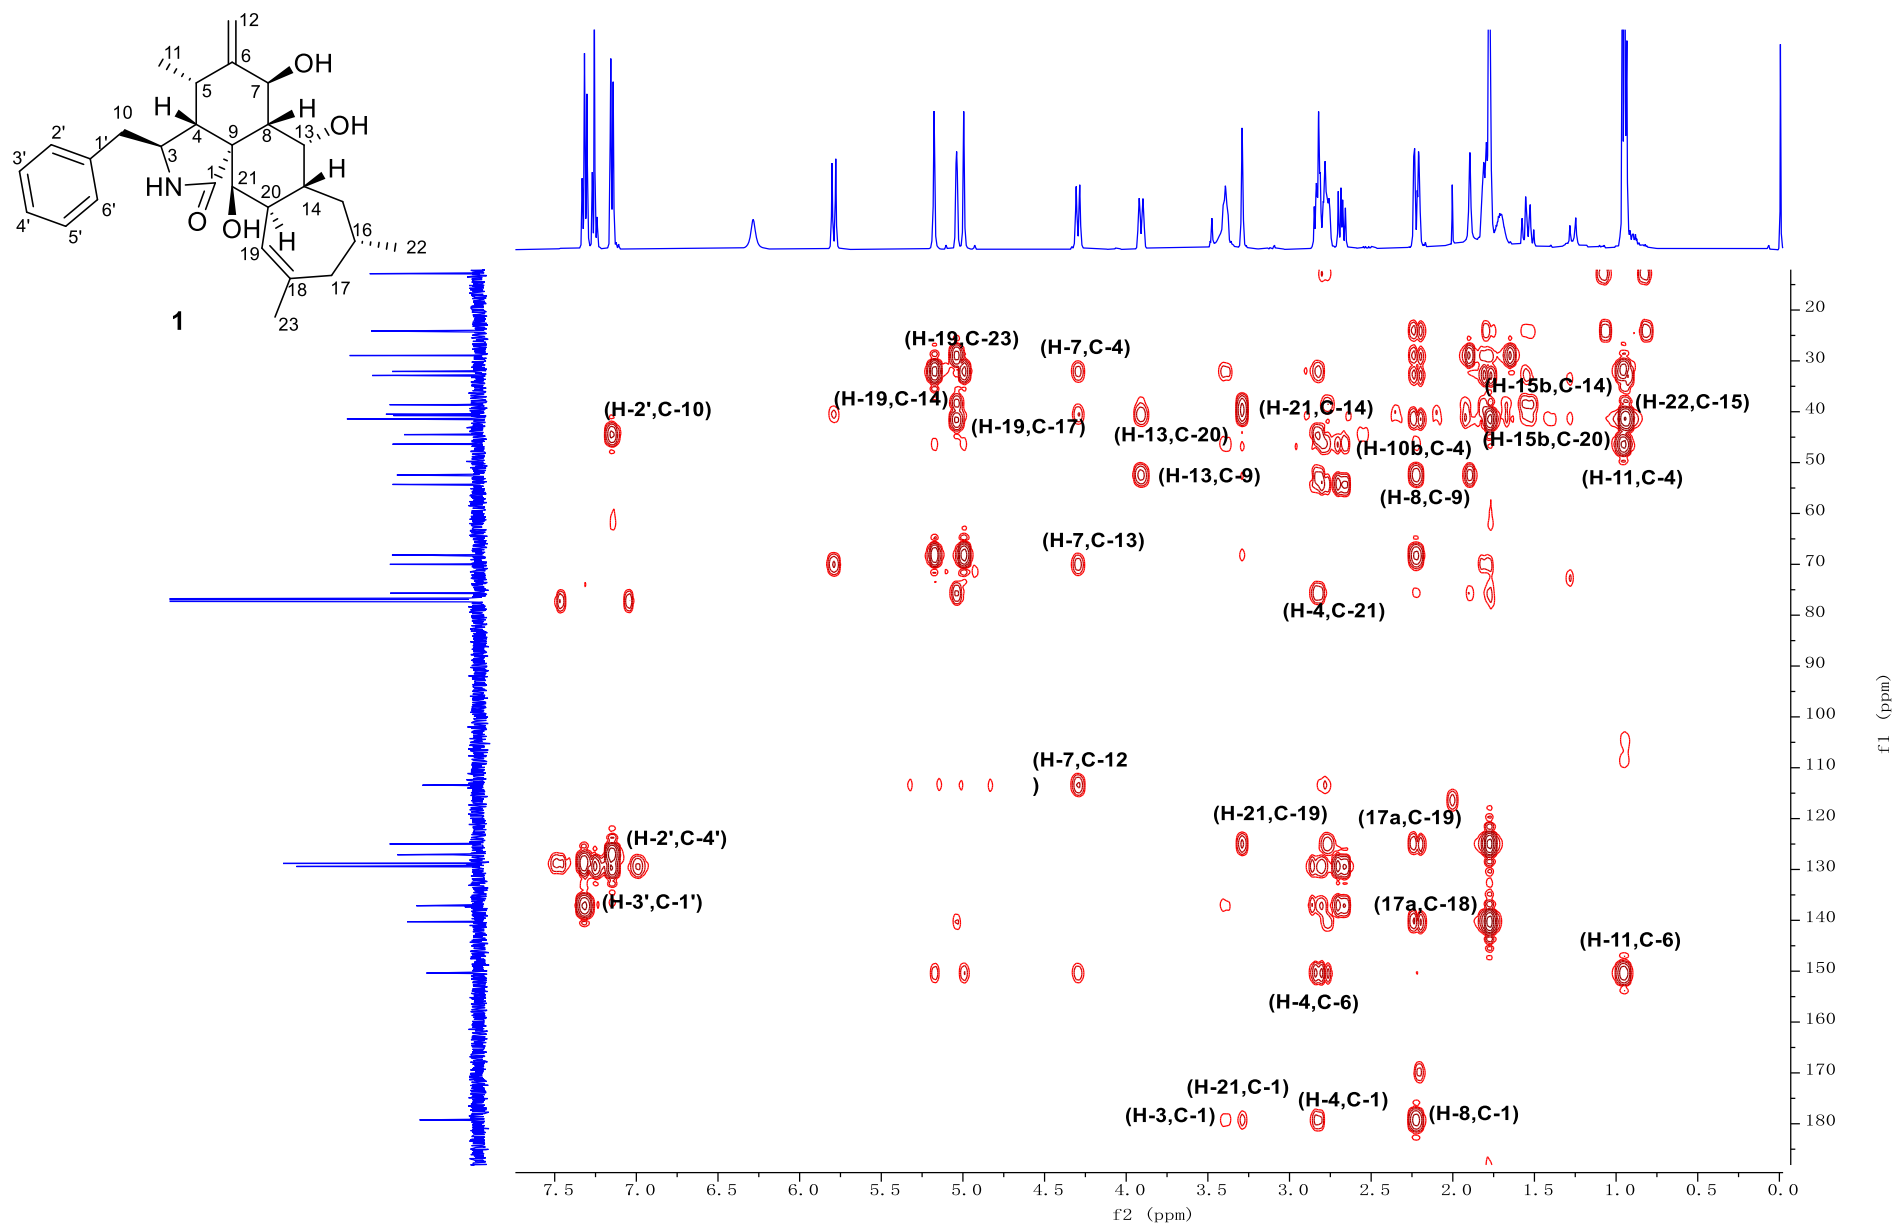

Figure S11. HMBC spectrum of **1** (CDCl<sub>3</sub>).

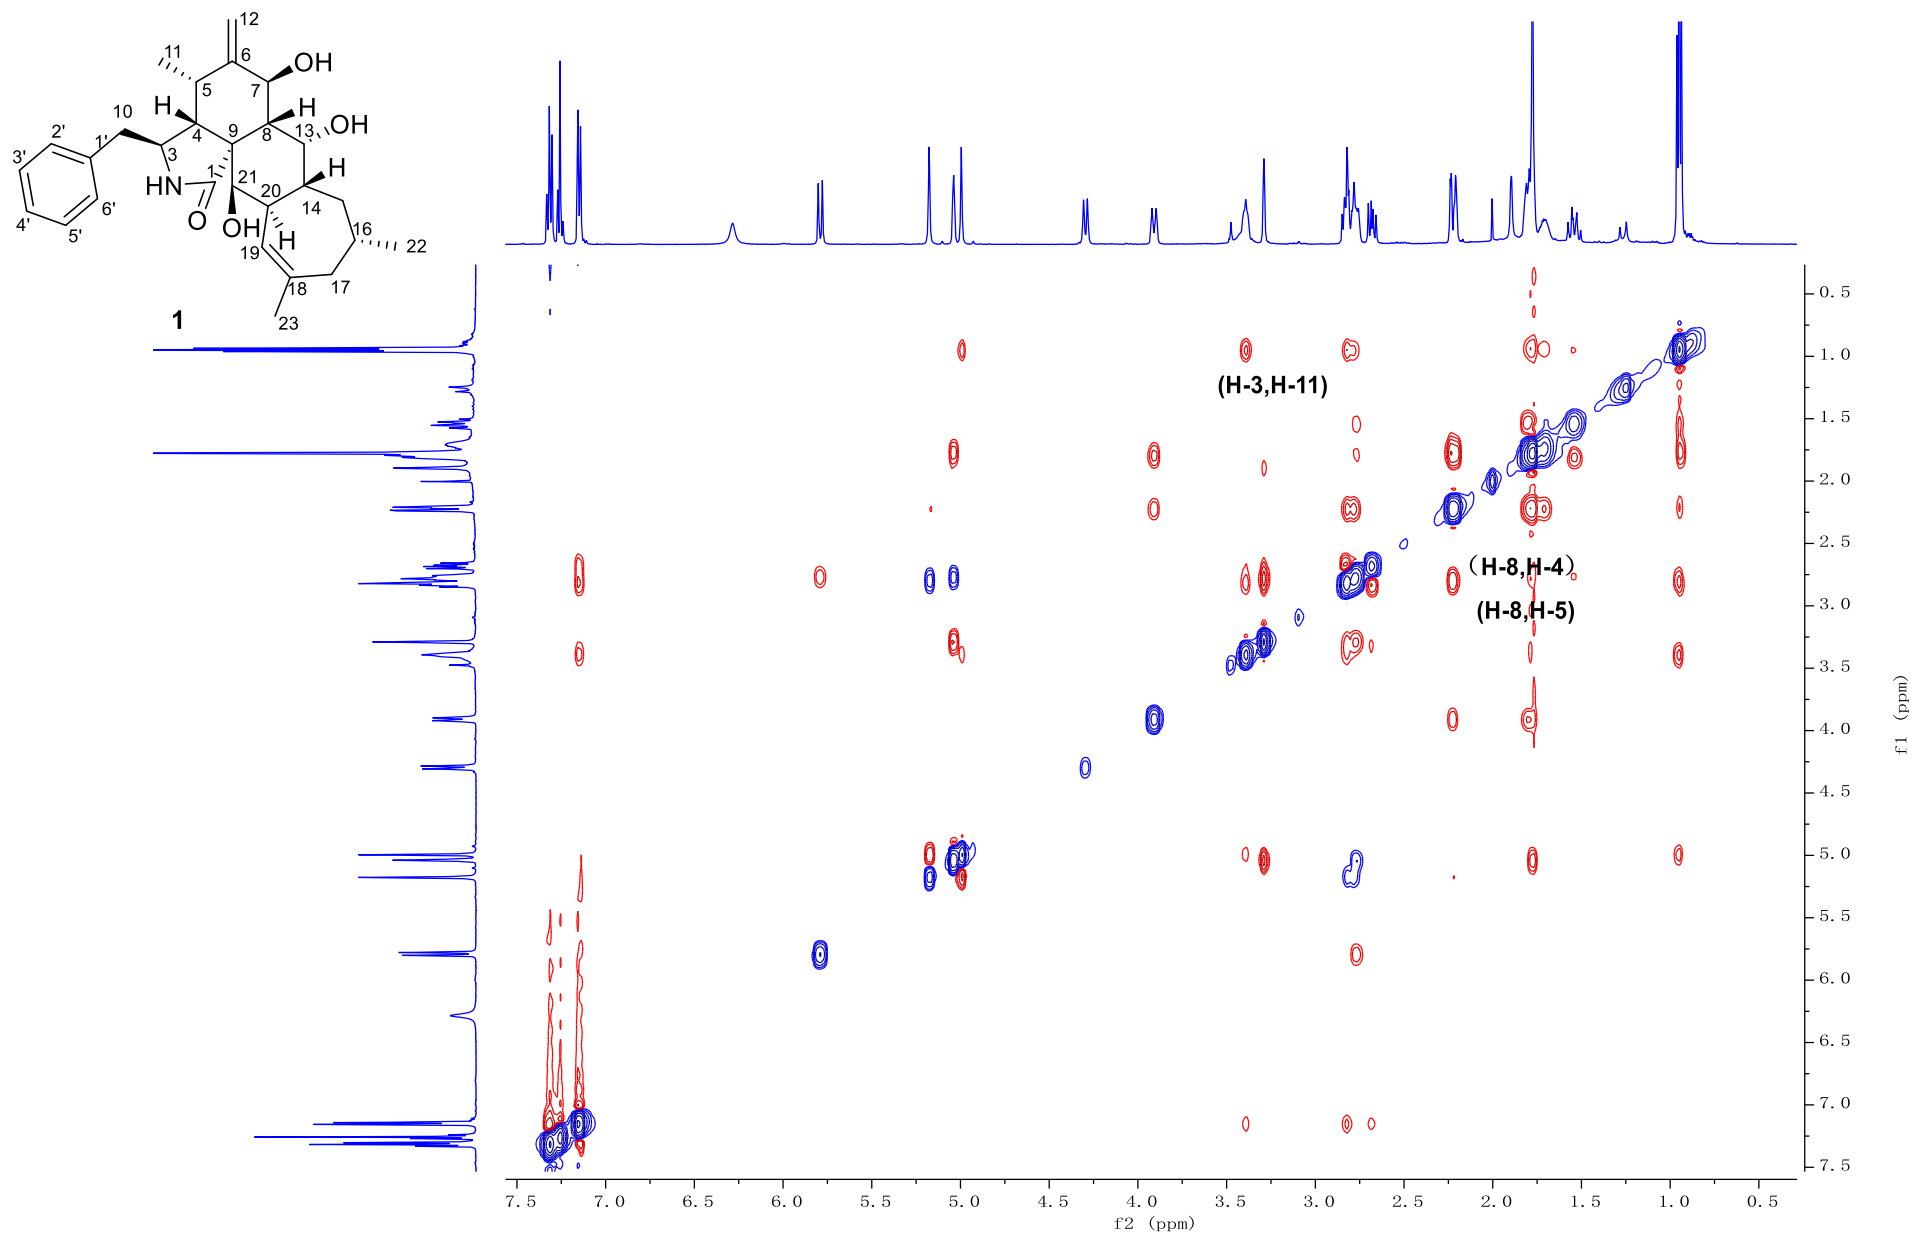

**Figure S12.** ROESY spectrum of **1** ( $\text{CDCl}_3$ ).

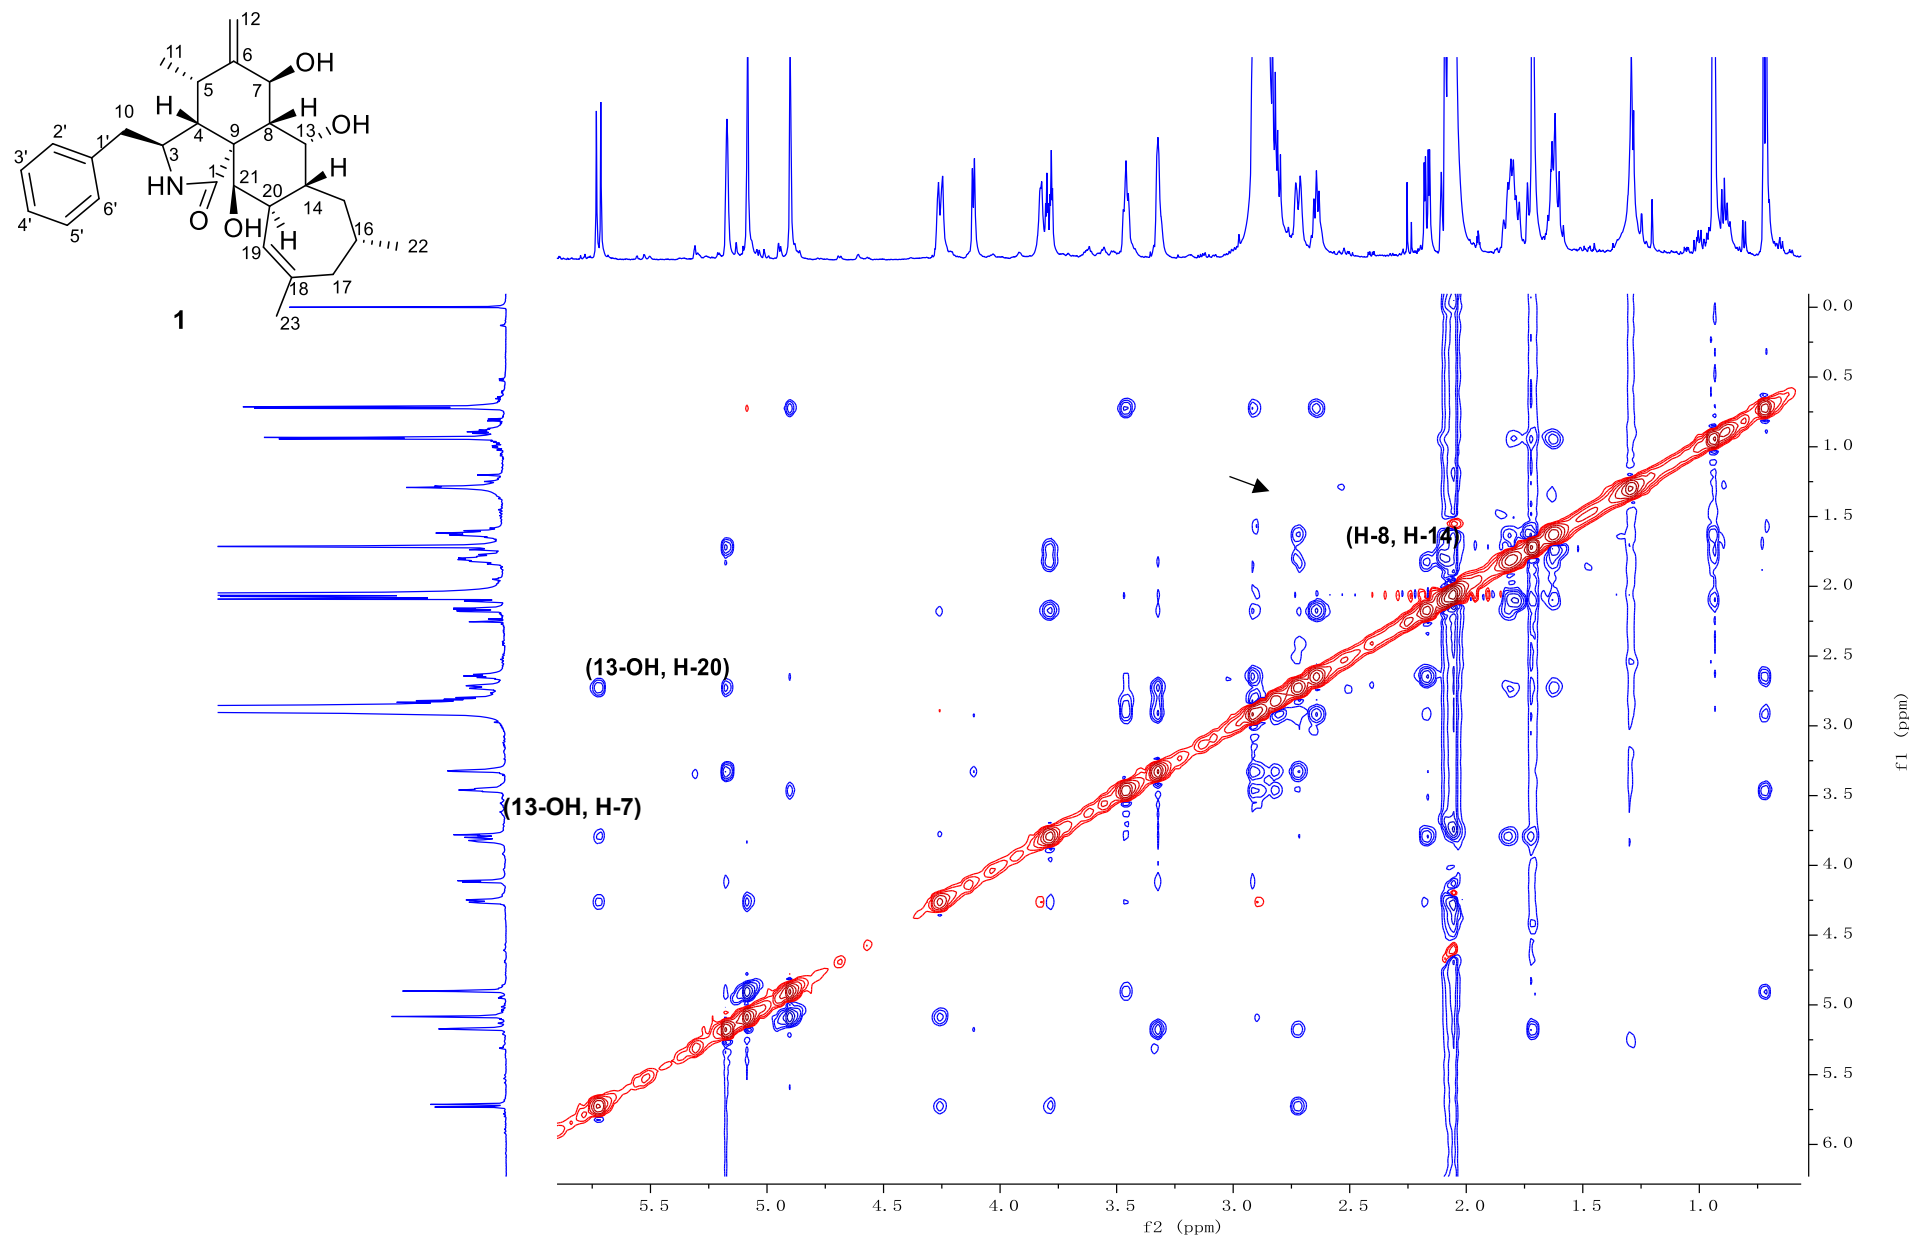

Figure S13. ROESY spectrum of **1** ( $\text{Acetone-}d_6$ ).

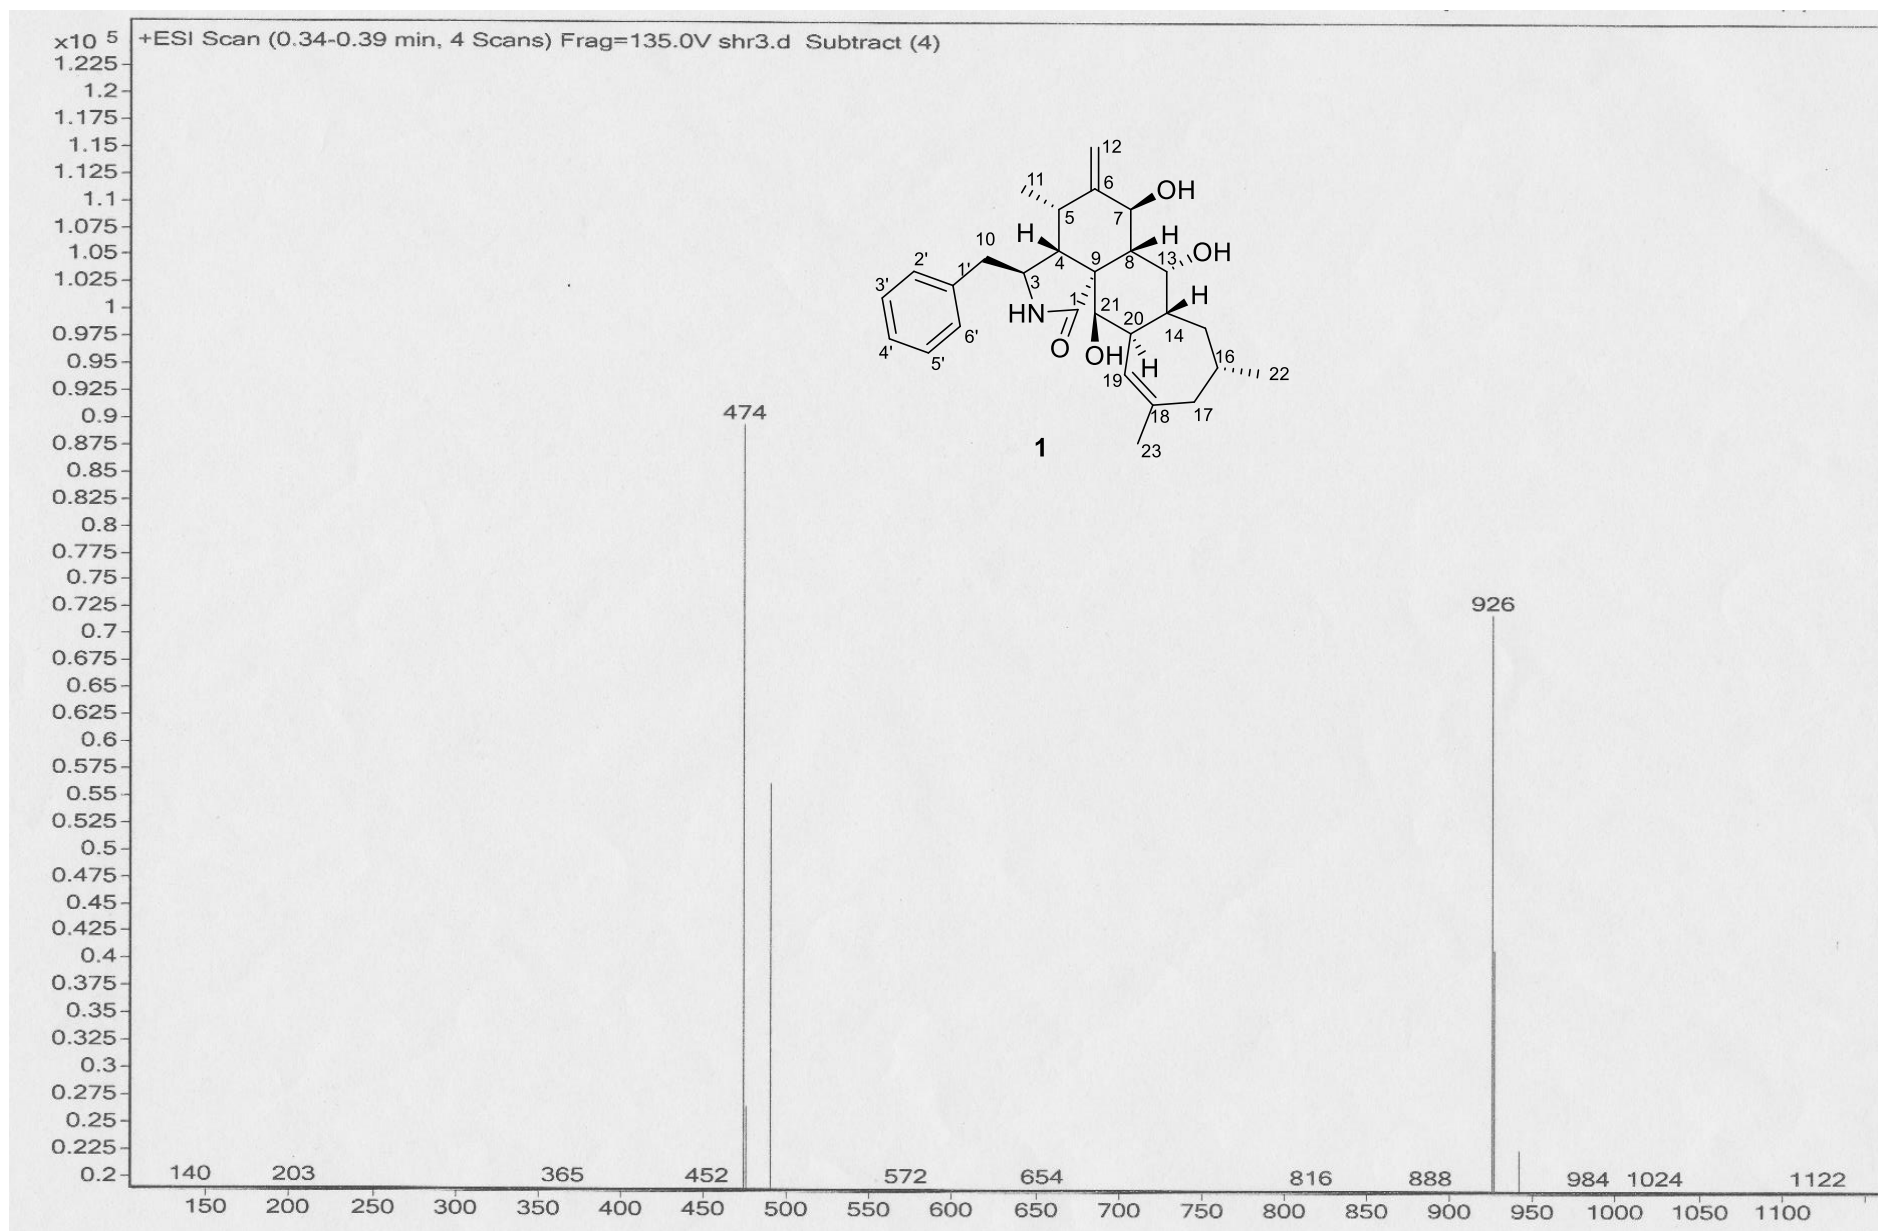

Figure S14. ESIMS spectrum of 1.

Sample Group  
Acquisition SW  
Version

6200 series TOF/6500 series  
Q-TOF B.05.01 (B5125.2)

Info.

# User Spectra

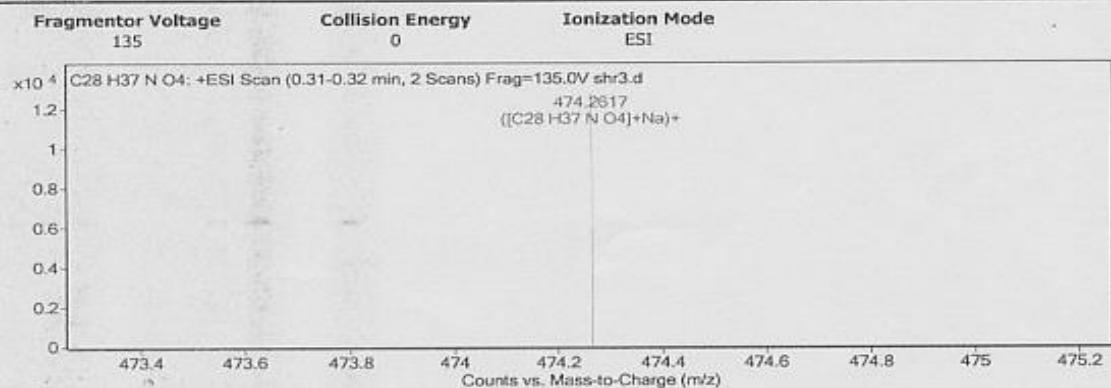

## Peak List

| m/z      | z | Abund    | Formula      | Ion     |
|----------|---|----------|--------------|---------|
| 128.9537 |   | 2753.73  |              |         |
| 239.1614 | 1 | 2514.73  |              |         |
| 245.078  | 1 | 2732.77  |              |         |
| 474.2617 | 1 | 12673.1  | C28 H37 N O4 | (M+Na)+ |
| 475.2648 | 1 | 3789.87  | C28 H37 N O4 | (M+Na)+ |
| 490.2358 | 1 | 16934.91 |              |         |
| 491.2399 | 1 | 5061.51  |              |         |
| 922.0098 | 1 | 3916.07  |              |         |
| 925.5339 | 1 | 4006.89  |              |         |
| 959.9661 | 1 | 6612.91  |              |         |

## Formula Calculator Element Limits

| Element | Min | Max |
|---------|-----|-----|
| C       | 3   | 60  |
| H       | 0   | 120 |
| O       | 0   | 30  |
| N       | 0   | 10  |

## Formula Calculator Results

| Formula      | CalculatedMass | CalculatedMz | Mz       | Diff. (mDa) | Diff. (ppm) | DBE     |
|--------------|----------------|--------------|----------|-------------|-------------|---------|
| C28 H37 N O4 | 451.2723       | 474.2615     | 474.2617 | -0.2        | -0.3        | 11.0000 |

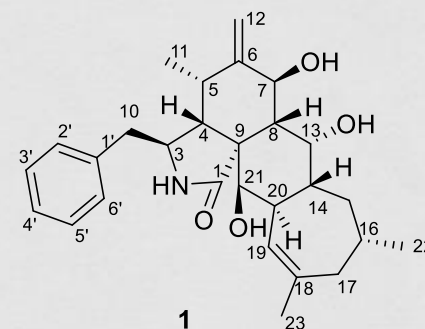

Figure S15. HRESIMS spectrum of 1.

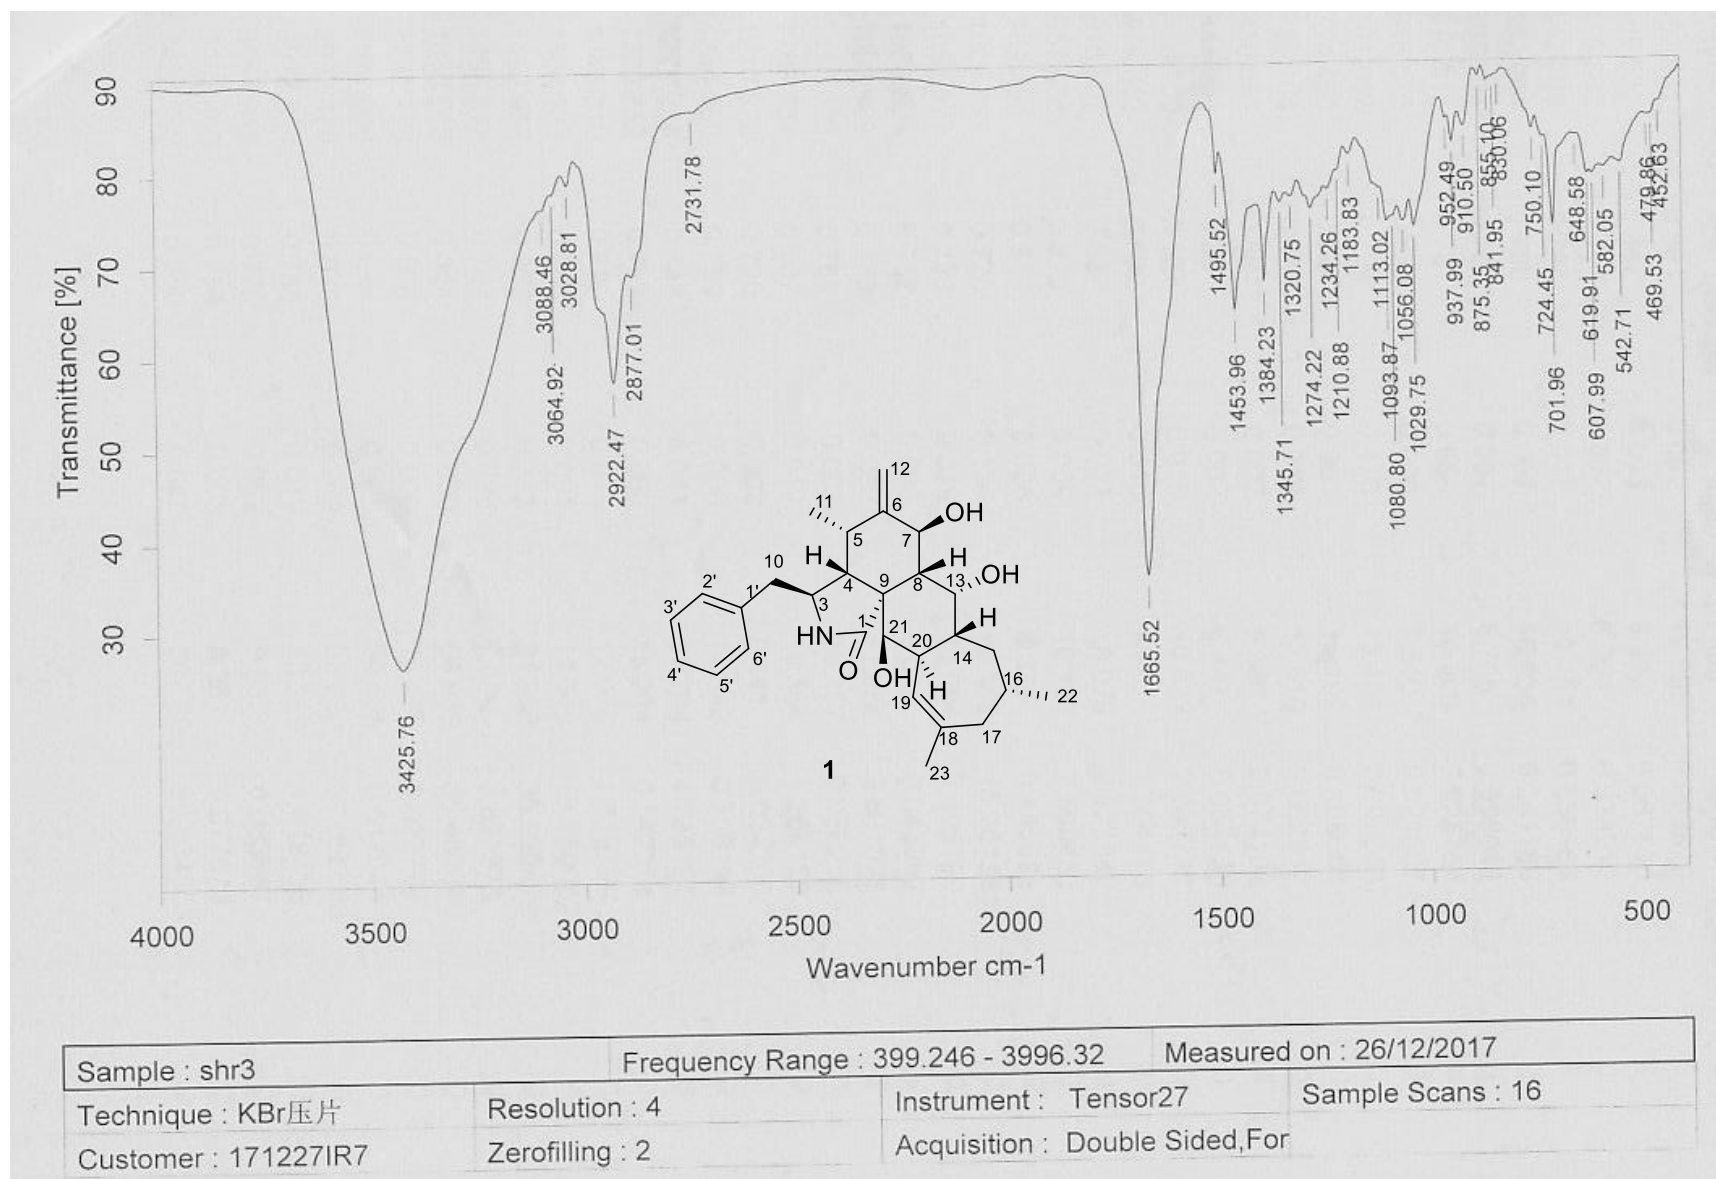

**Figure S16.** IR spectrum of **1**.

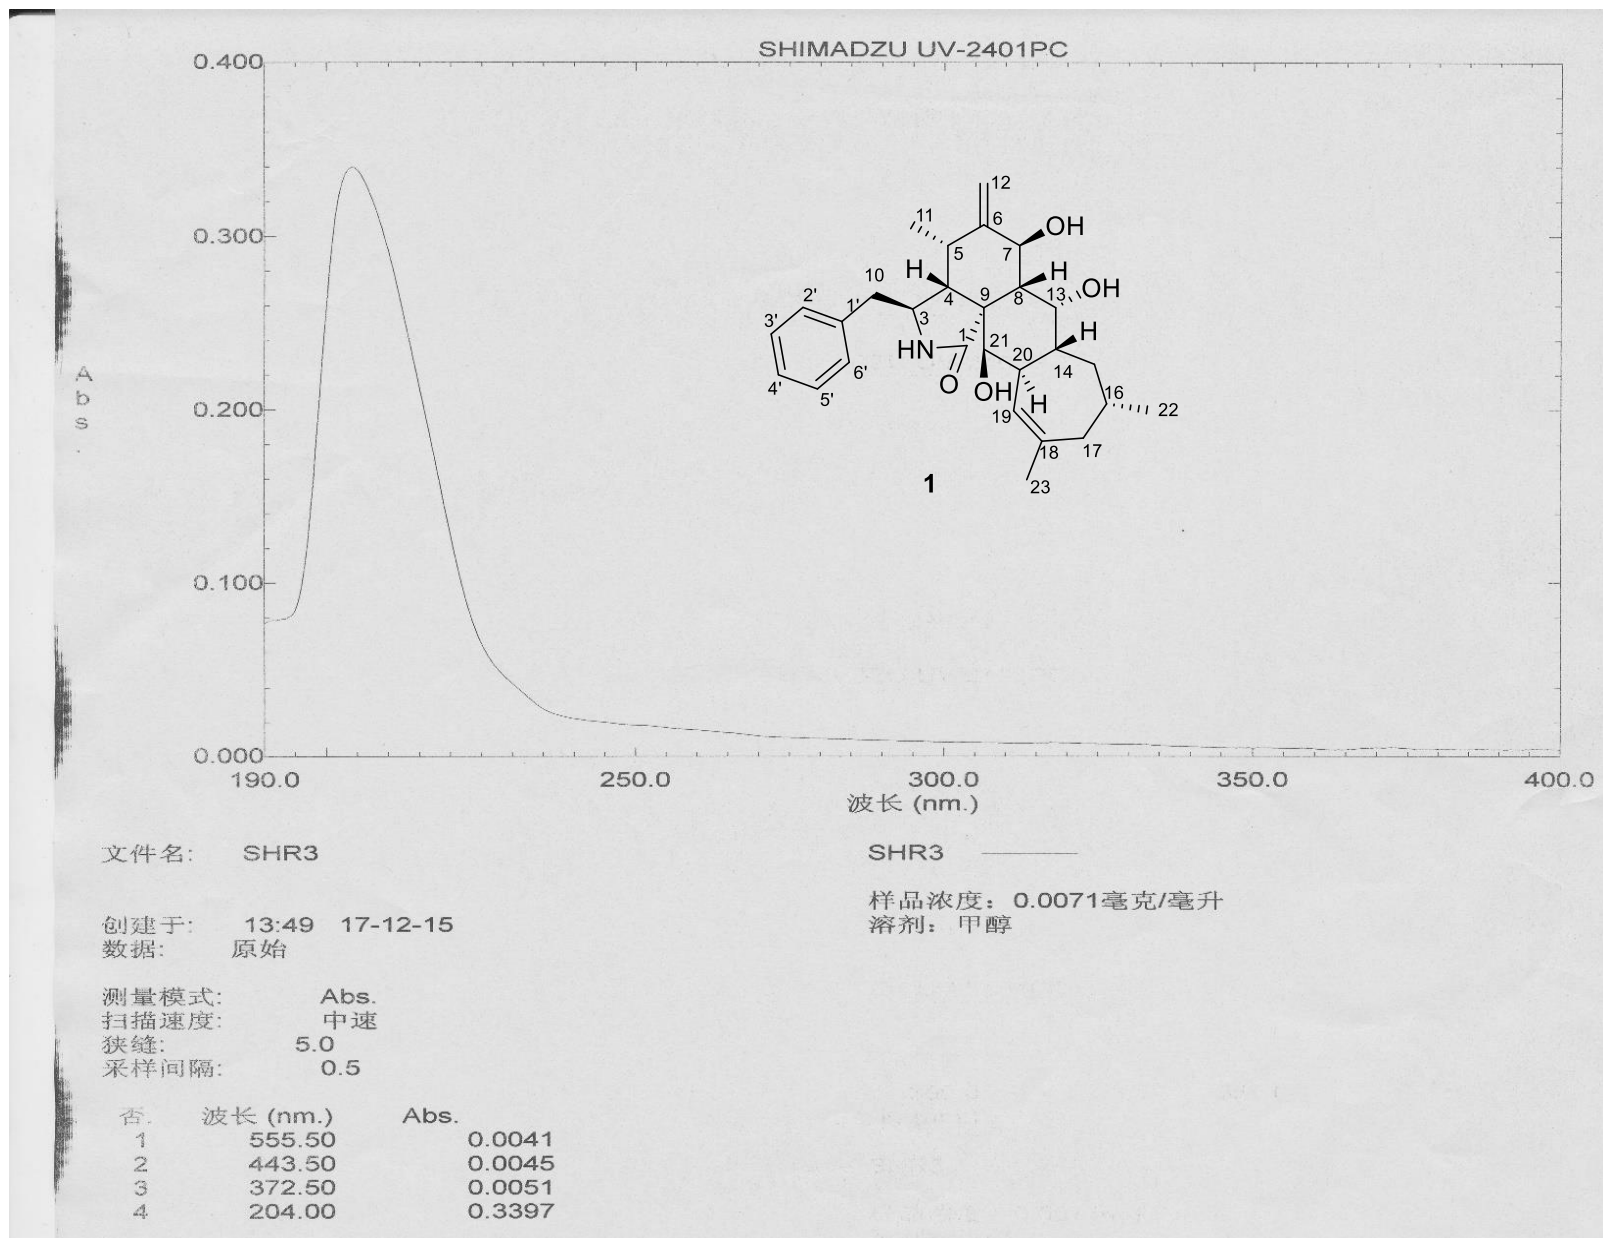

Figure S17. UV spectrum of 1.

Optical rotation measurement

Model : P-1020 (A060460638)

| No.  | Sample   | Mode   | Data    | Monitor<br>Blank | Temp.<br>Cell<br>Temp Point | Date<br>Comment<br>Sample Name                       | Light<br>Filter<br>Operator | Cycle Time<br>Integ Time |
|------|----------|--------|---------|------------------|-----------------------------|------------------------------------------------------|-----------------------------|--------------------------|
| No.1 | 18 (1/3) | Sp.Rot | 57.3170 | 0.0235<br>0.0000 | 20.7<br>50.00<br>Cell       | Thu Nov 23 03:19:47 2017<br>0.00082g/mL MeOH<br>SHR3 | Na<br>589nm                 | 2 sec<br>2 sec           |
| No.2 | 18 (2/3) | Sp.Rot | 54.3900 | 0.0223<br>0.0000 | 20.7<br>50.00<br>Cell       | Thu Nov 23 03:19:52 2017<br>0.00082g/mL MeOH<br>SHR3 | Na<br>589nm                 | 2 sec<br>2 sec           |
| No.3 | 18 (3/3) | Sp.Rot | 52.9270 | 0.0217<br>0.0000 | 20.7<br>50.00<br>Cell       | Thu Nov 23 03:19:57 2017<br>0.00082g/mL MeOH<br>SHR3 | Na<br>589nm                 | 2 sec<br>2 sec           |

+4.8780°

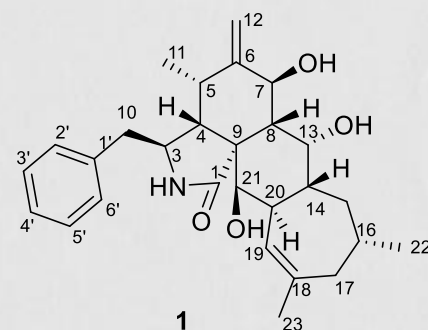

Figure S18. ORD spectrum of 1.

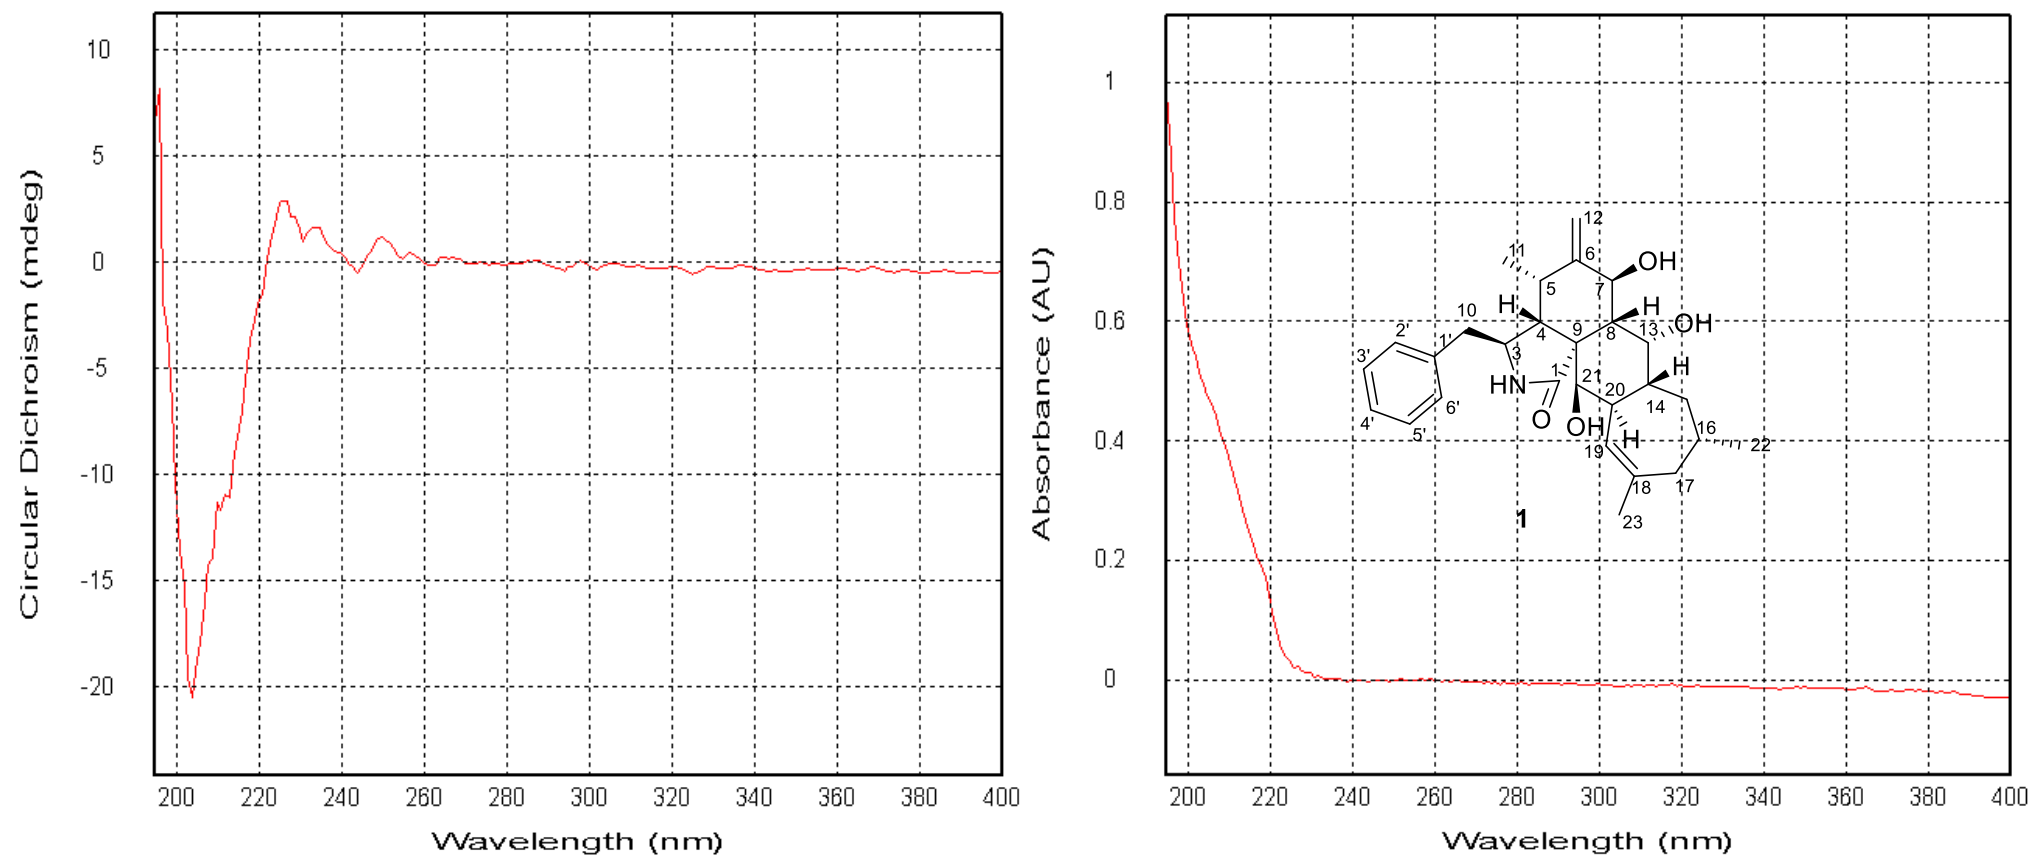

**Figure S19.** CD spectrum of **1**.

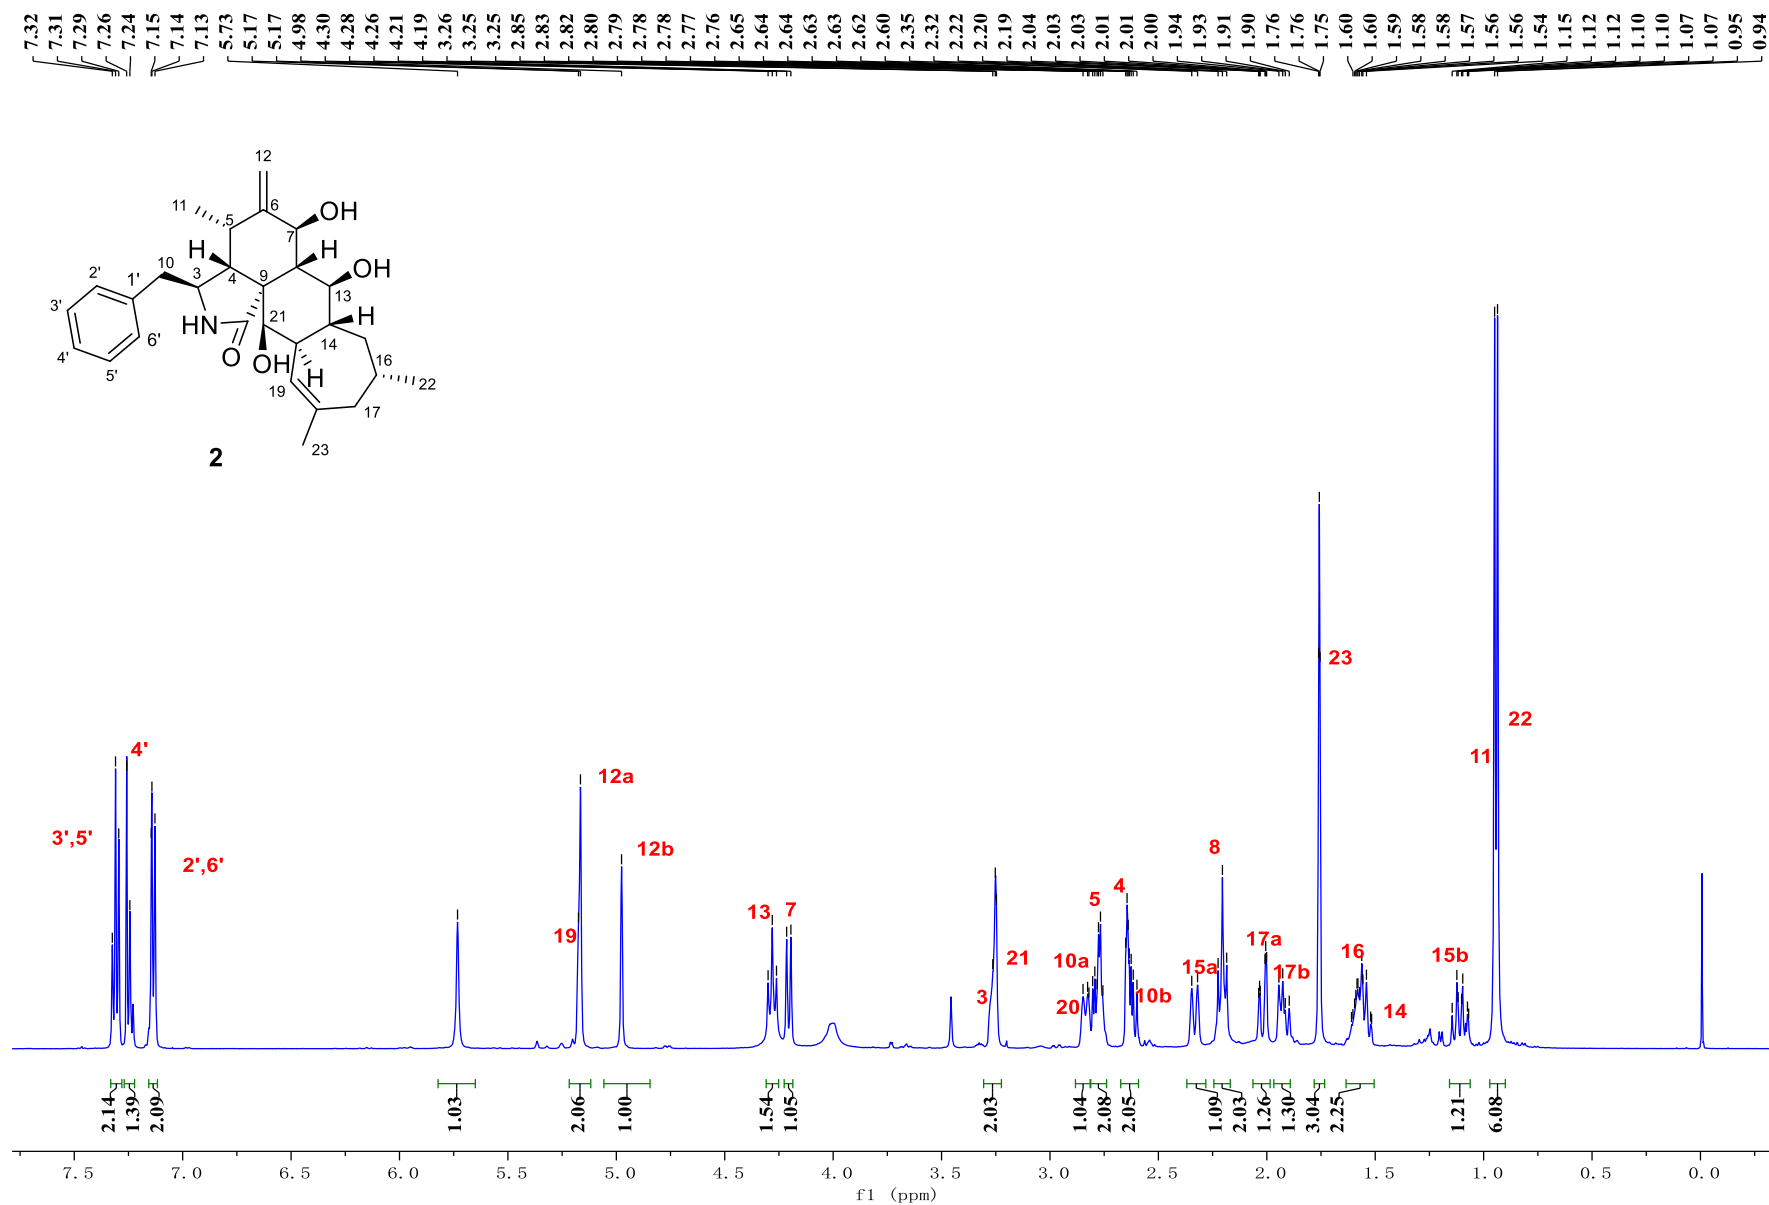

Figure S20.  $^1\text{H}$  NMR spectrum of **2** (500 MHz,  $\text{CDCl}_3$ ).

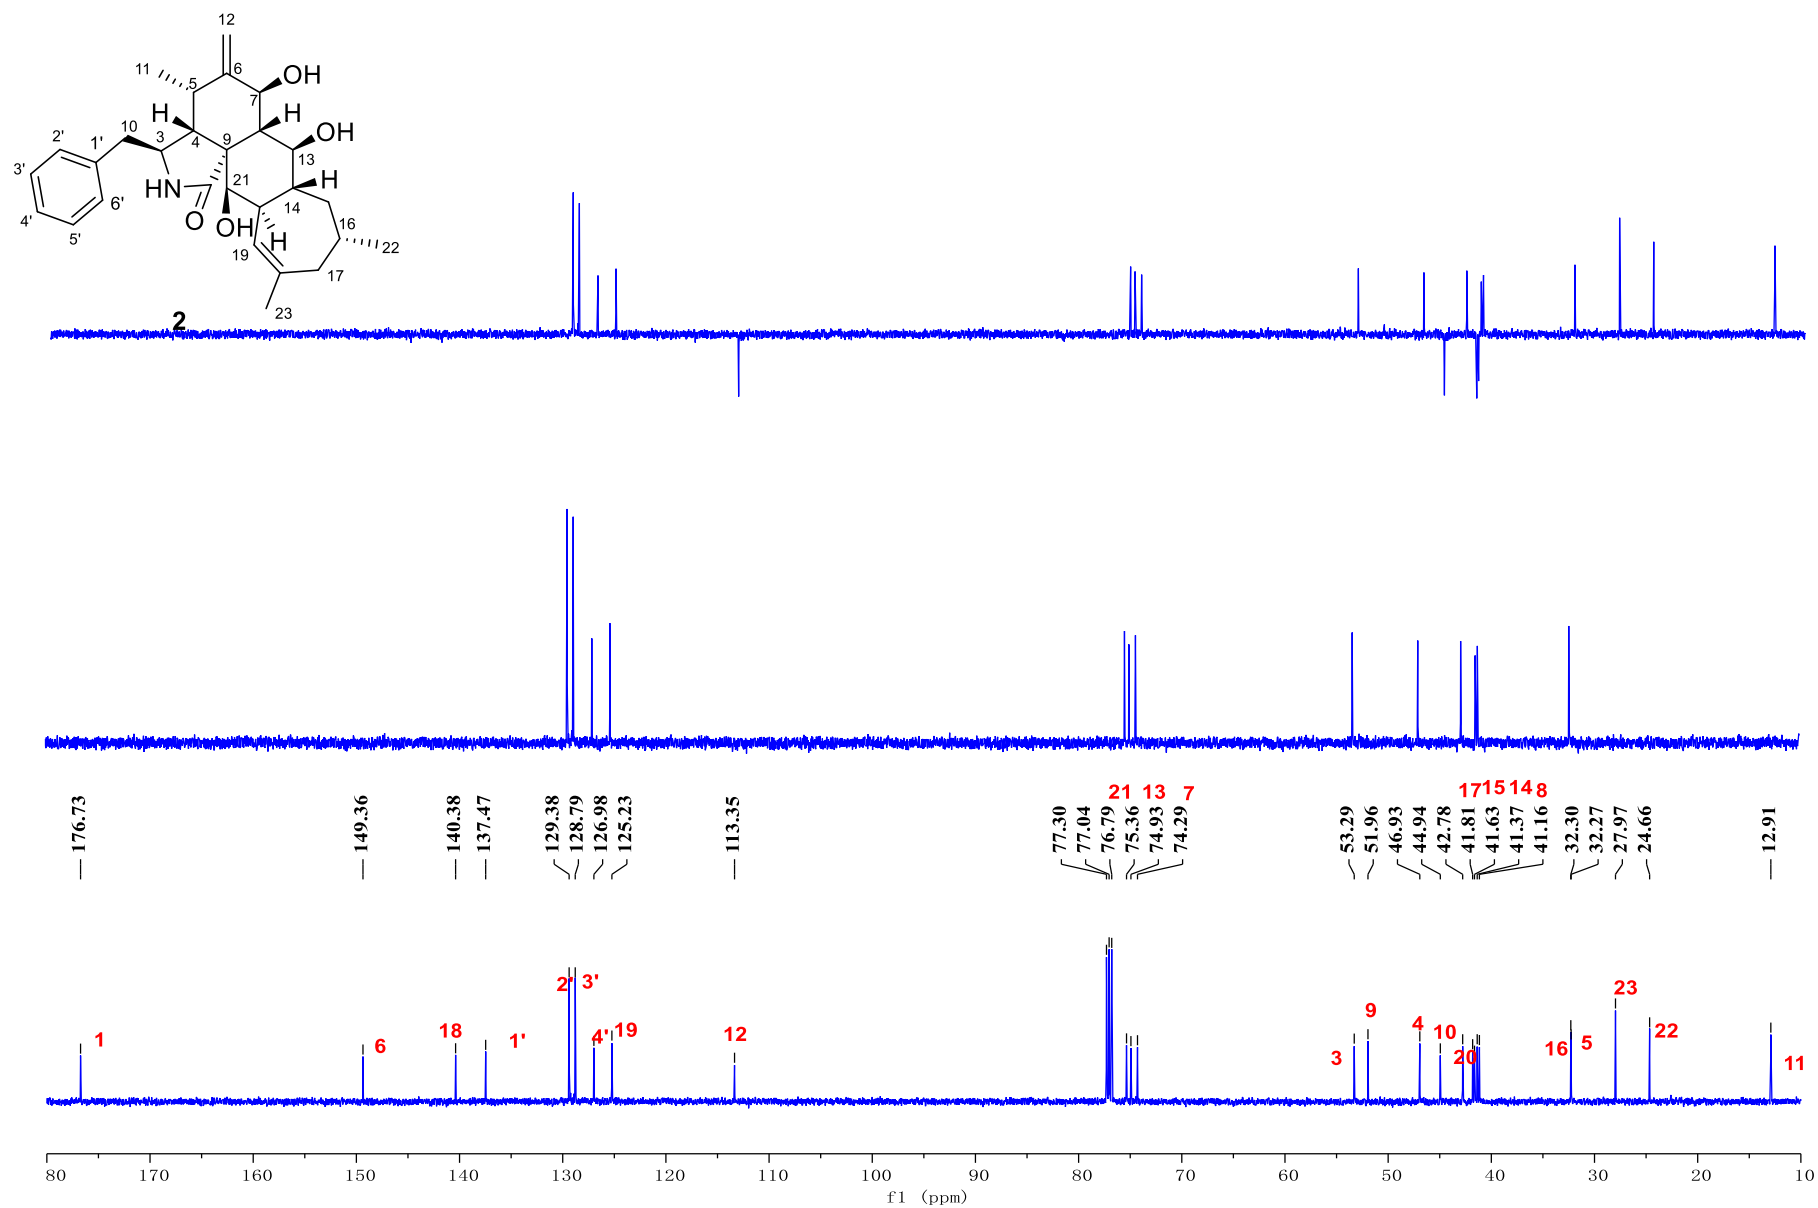

Figure S21.  $^{13}\text{C}$  NMR spectrum of **2** (125 MHz,  $\text{CDCl}_3$ ).

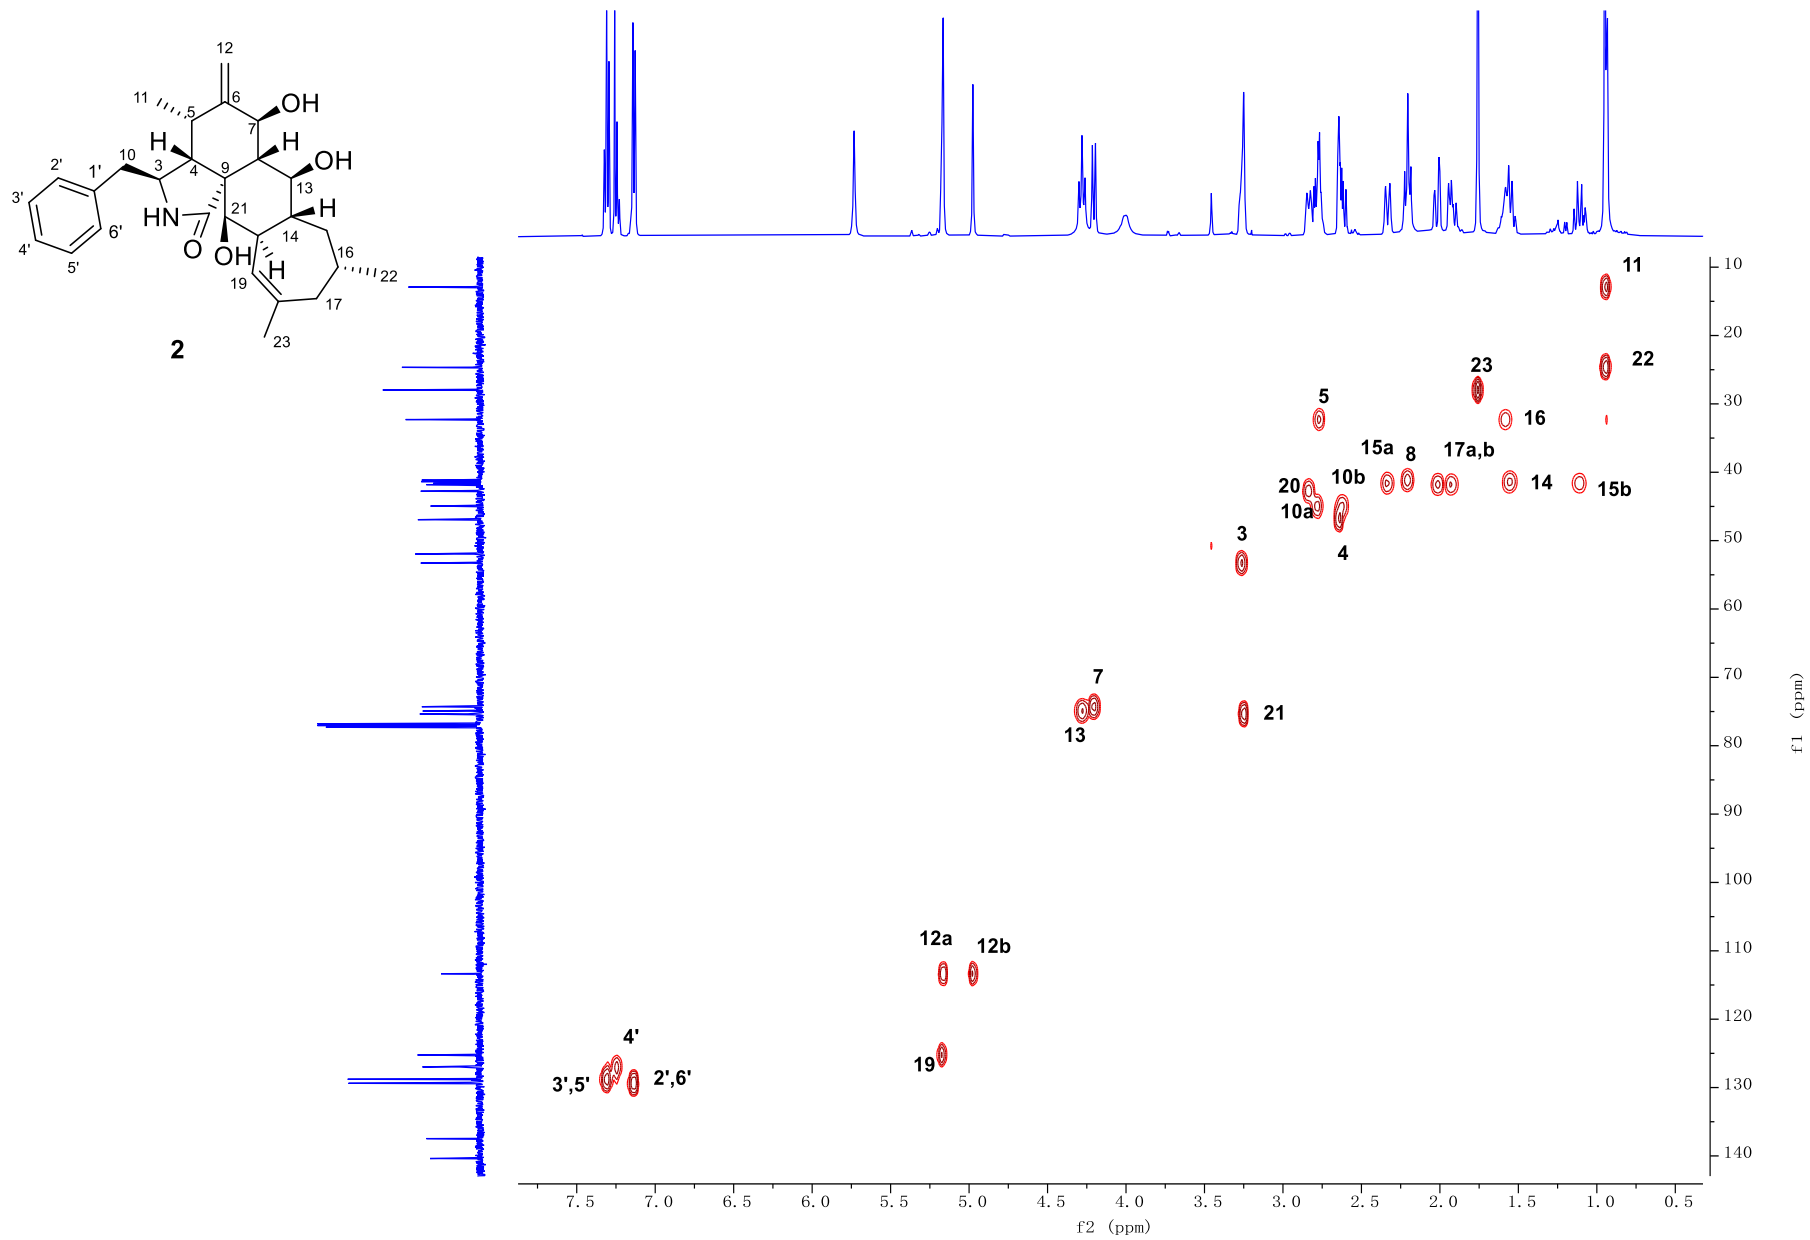

**Figure S21.** HSQC spectrum of **2** (CDCl<sub>3</sub>).

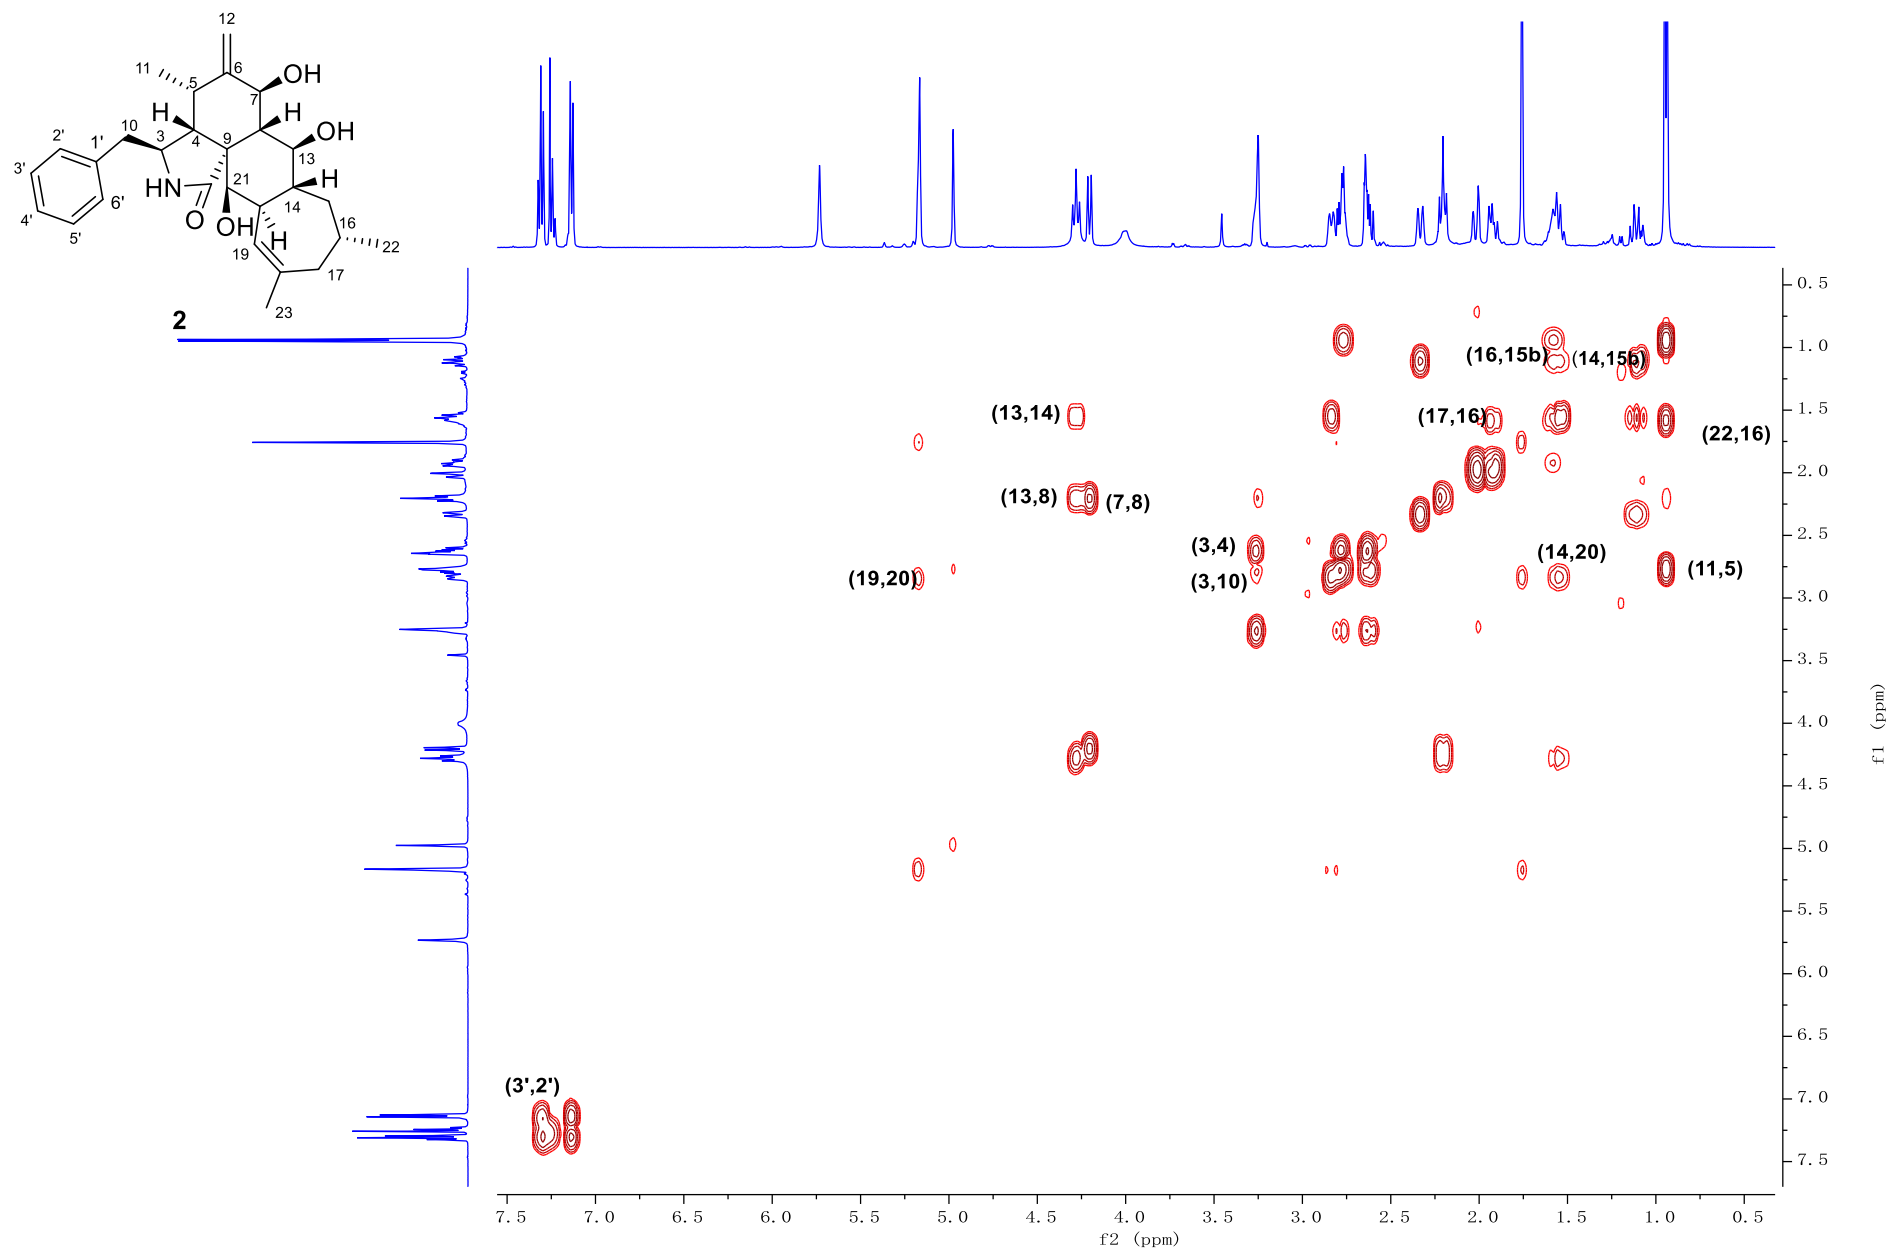

Figure S22.  $^1\text{H}$ - $^1\text{H}$  COSY spectrum of **2** ( $\text{CDCl}_3$ ).

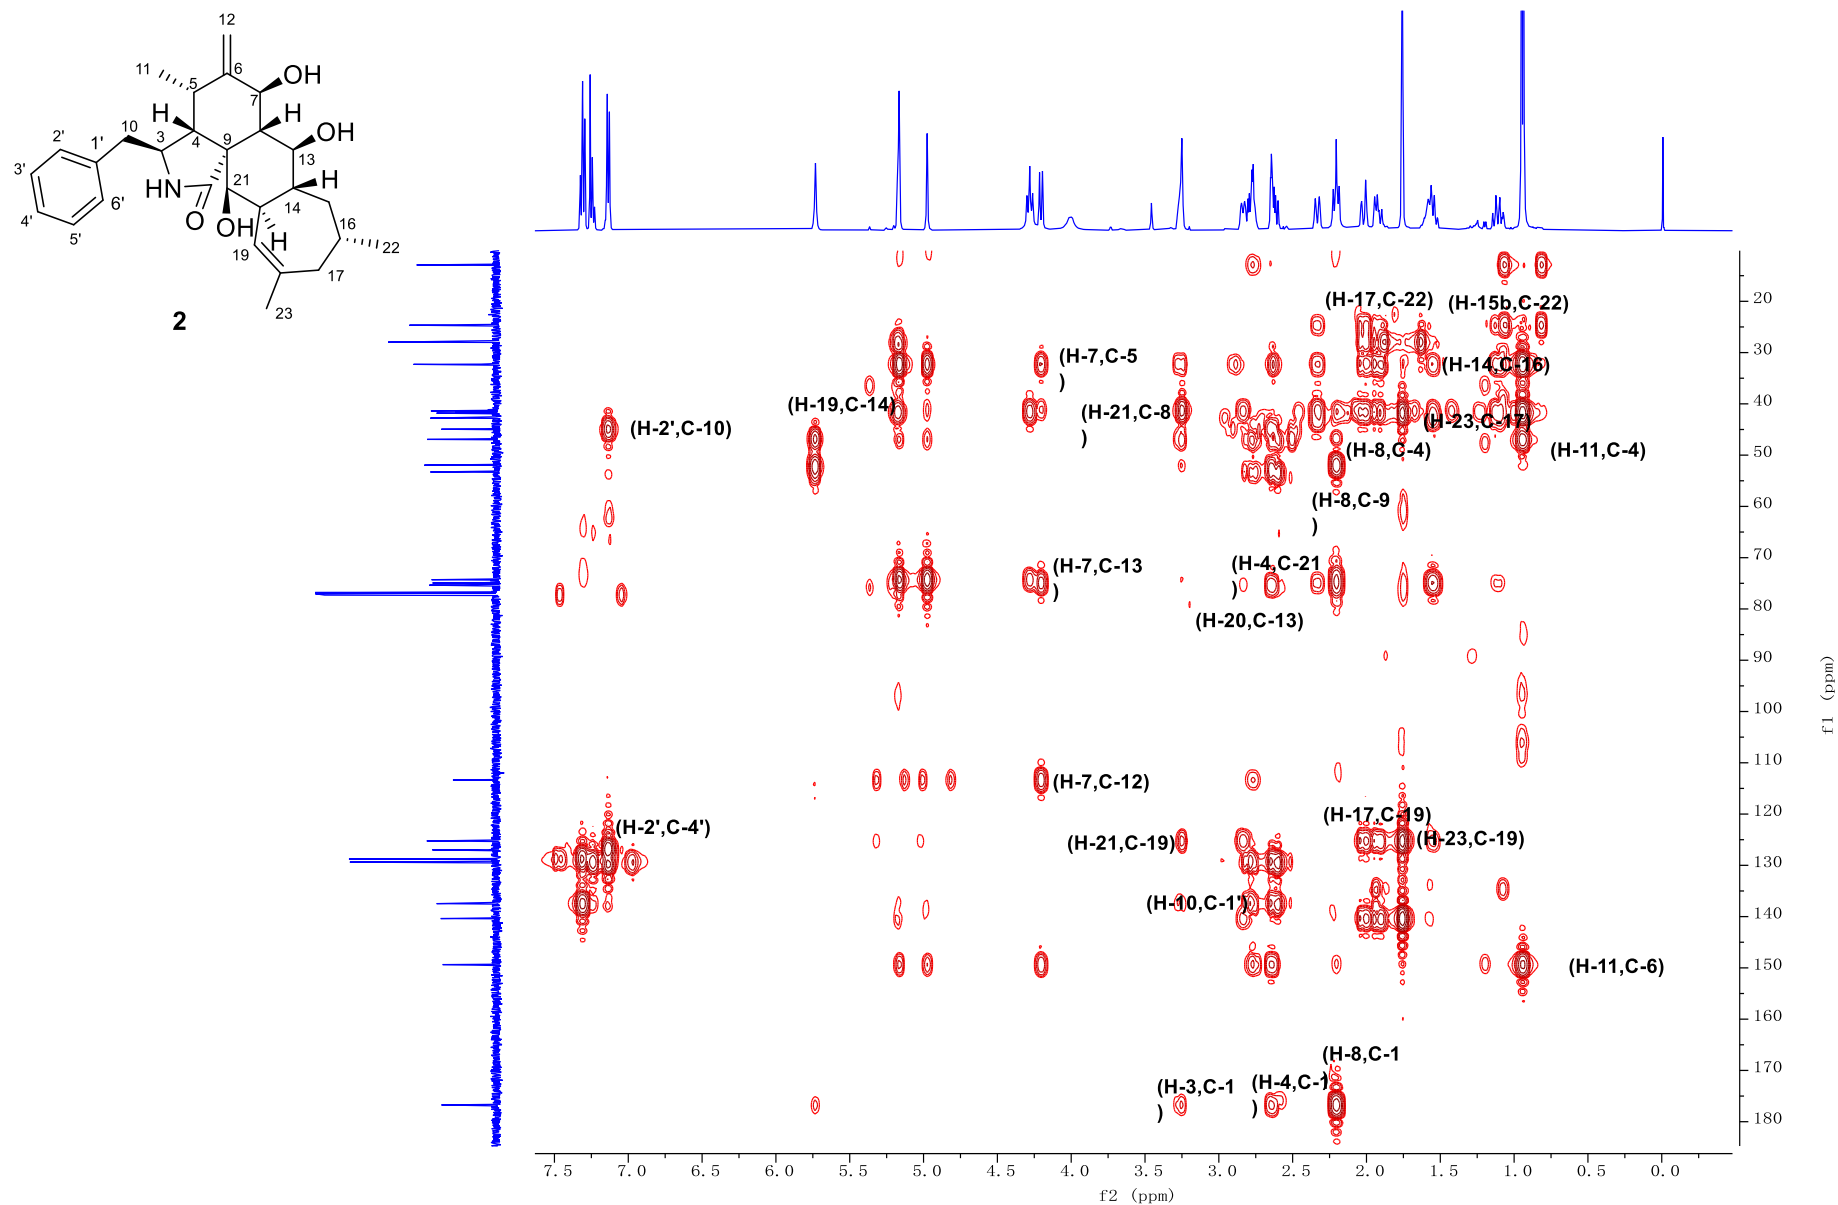

Figure S23. HMBC spectrum of **2** ( $\text{CDCl}_3$ ).

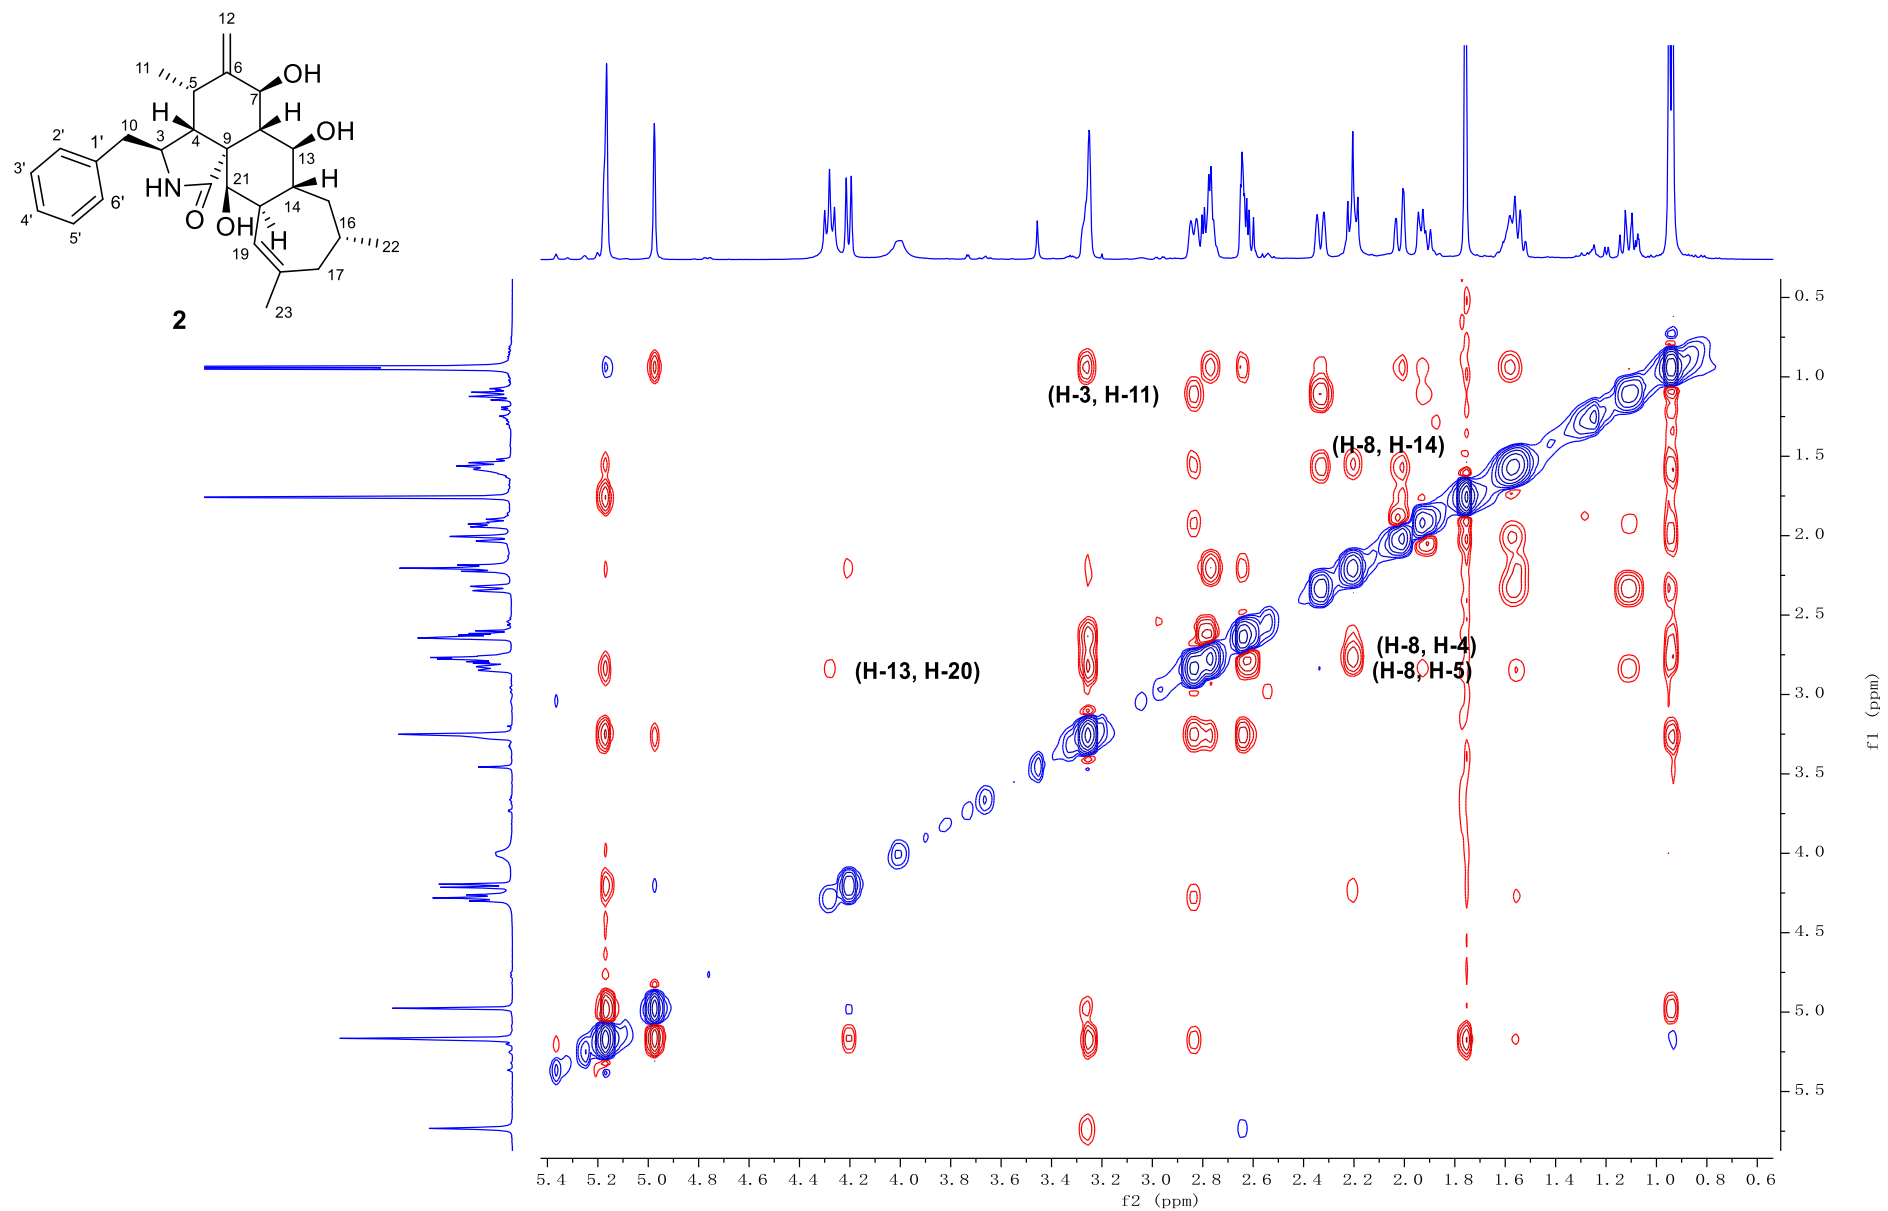

**Figure S24.** ROESY spectrum of **2** ( $\text{CDCl}_3$ ).

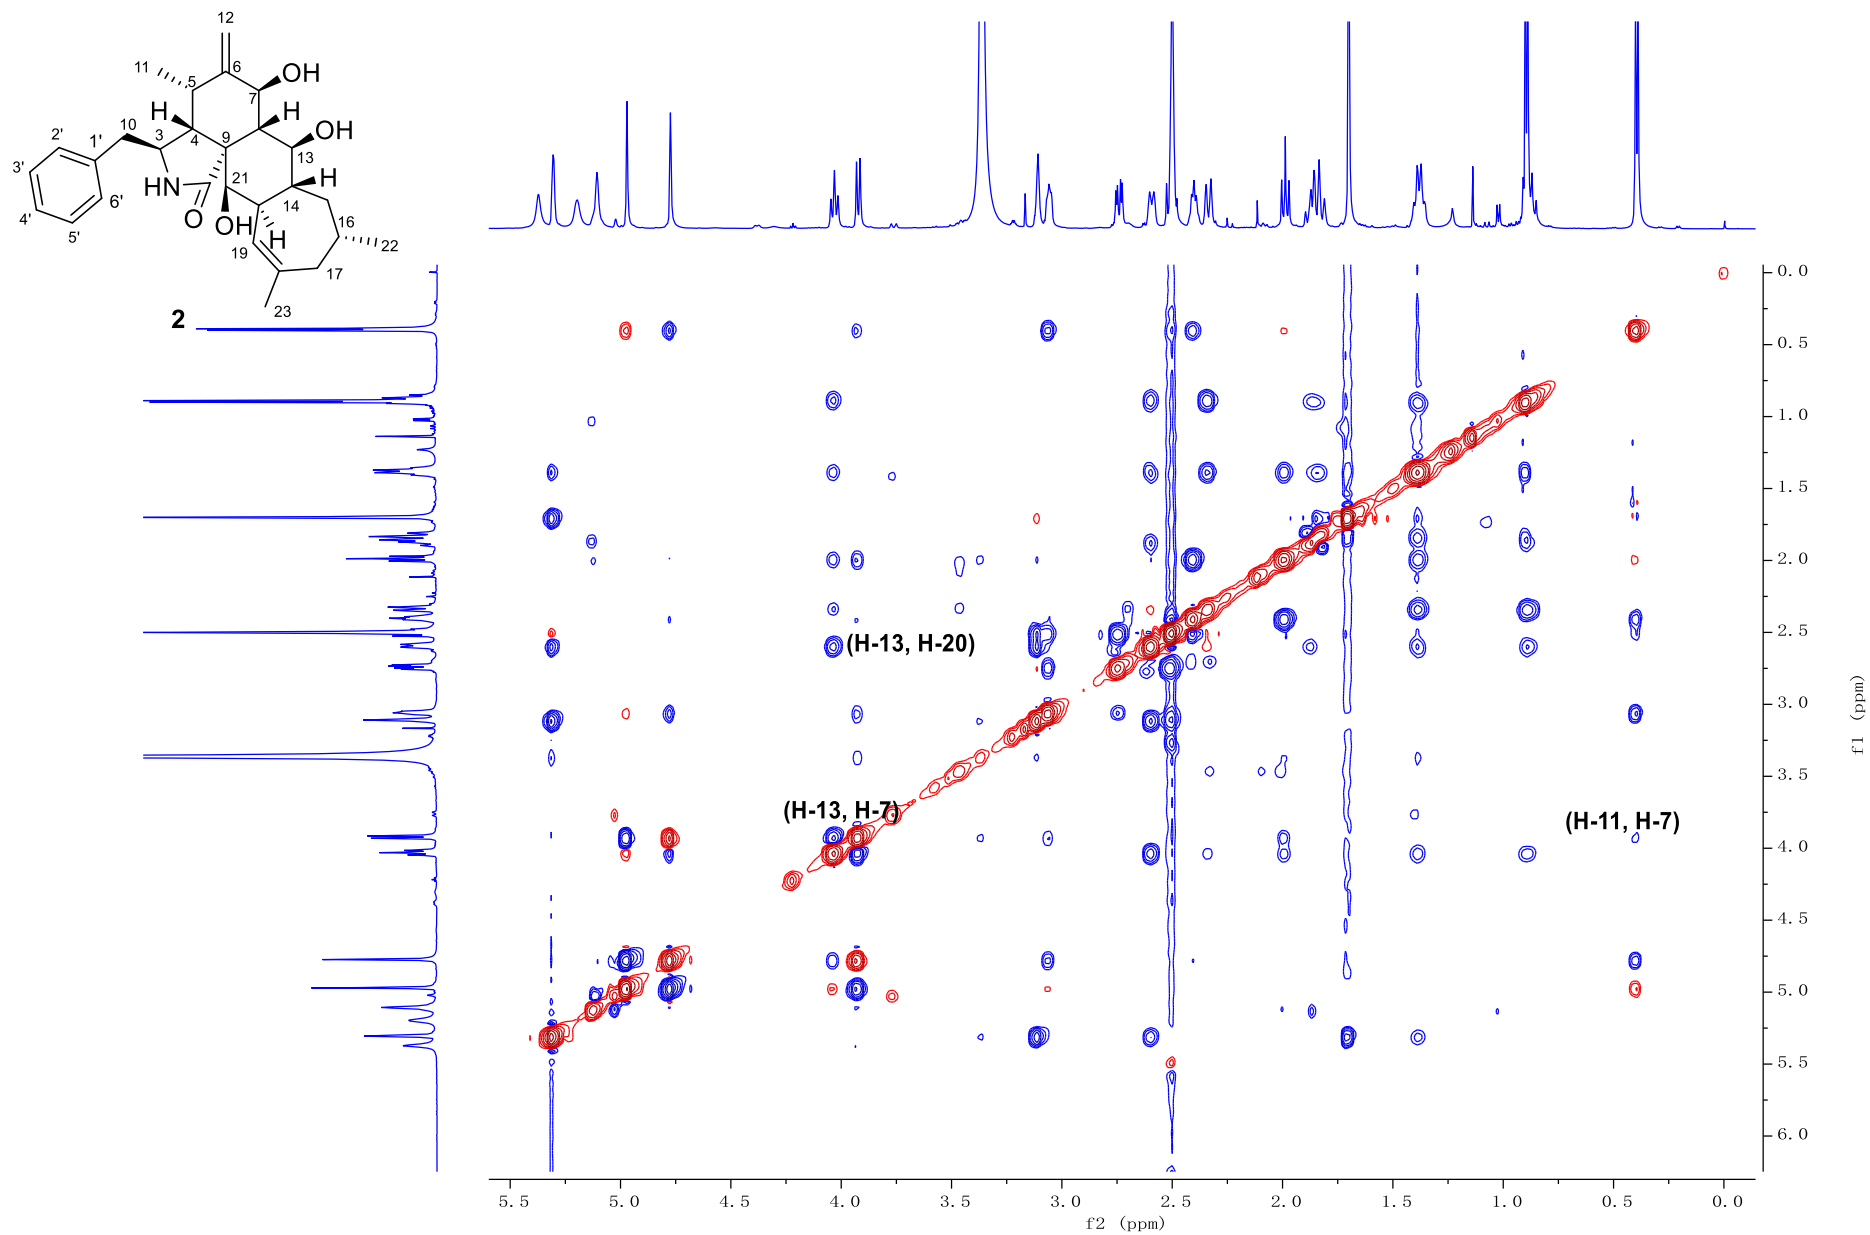

Figure S25. ROESY spectrum of **2** (DMSO-*d*<sub>6</sub>).

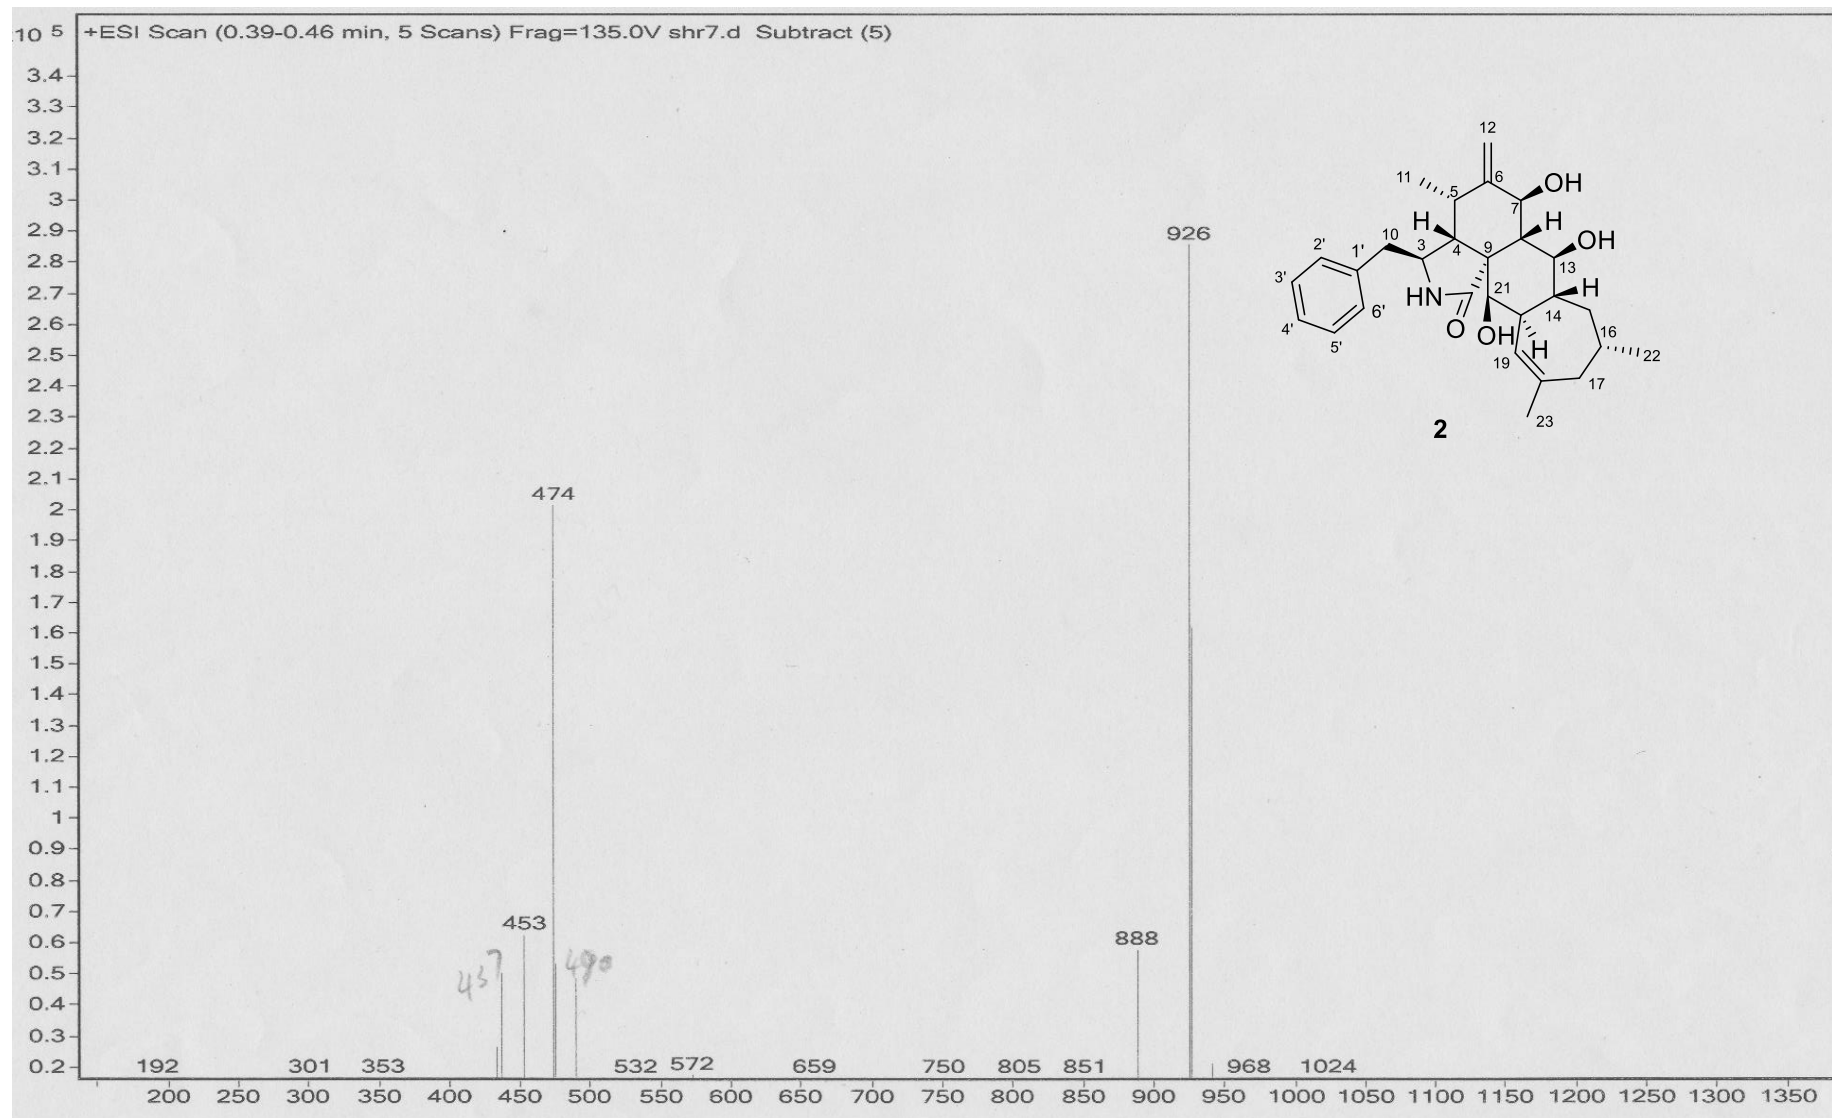

**Figure S26.** ESIMS spectrum of **2**.

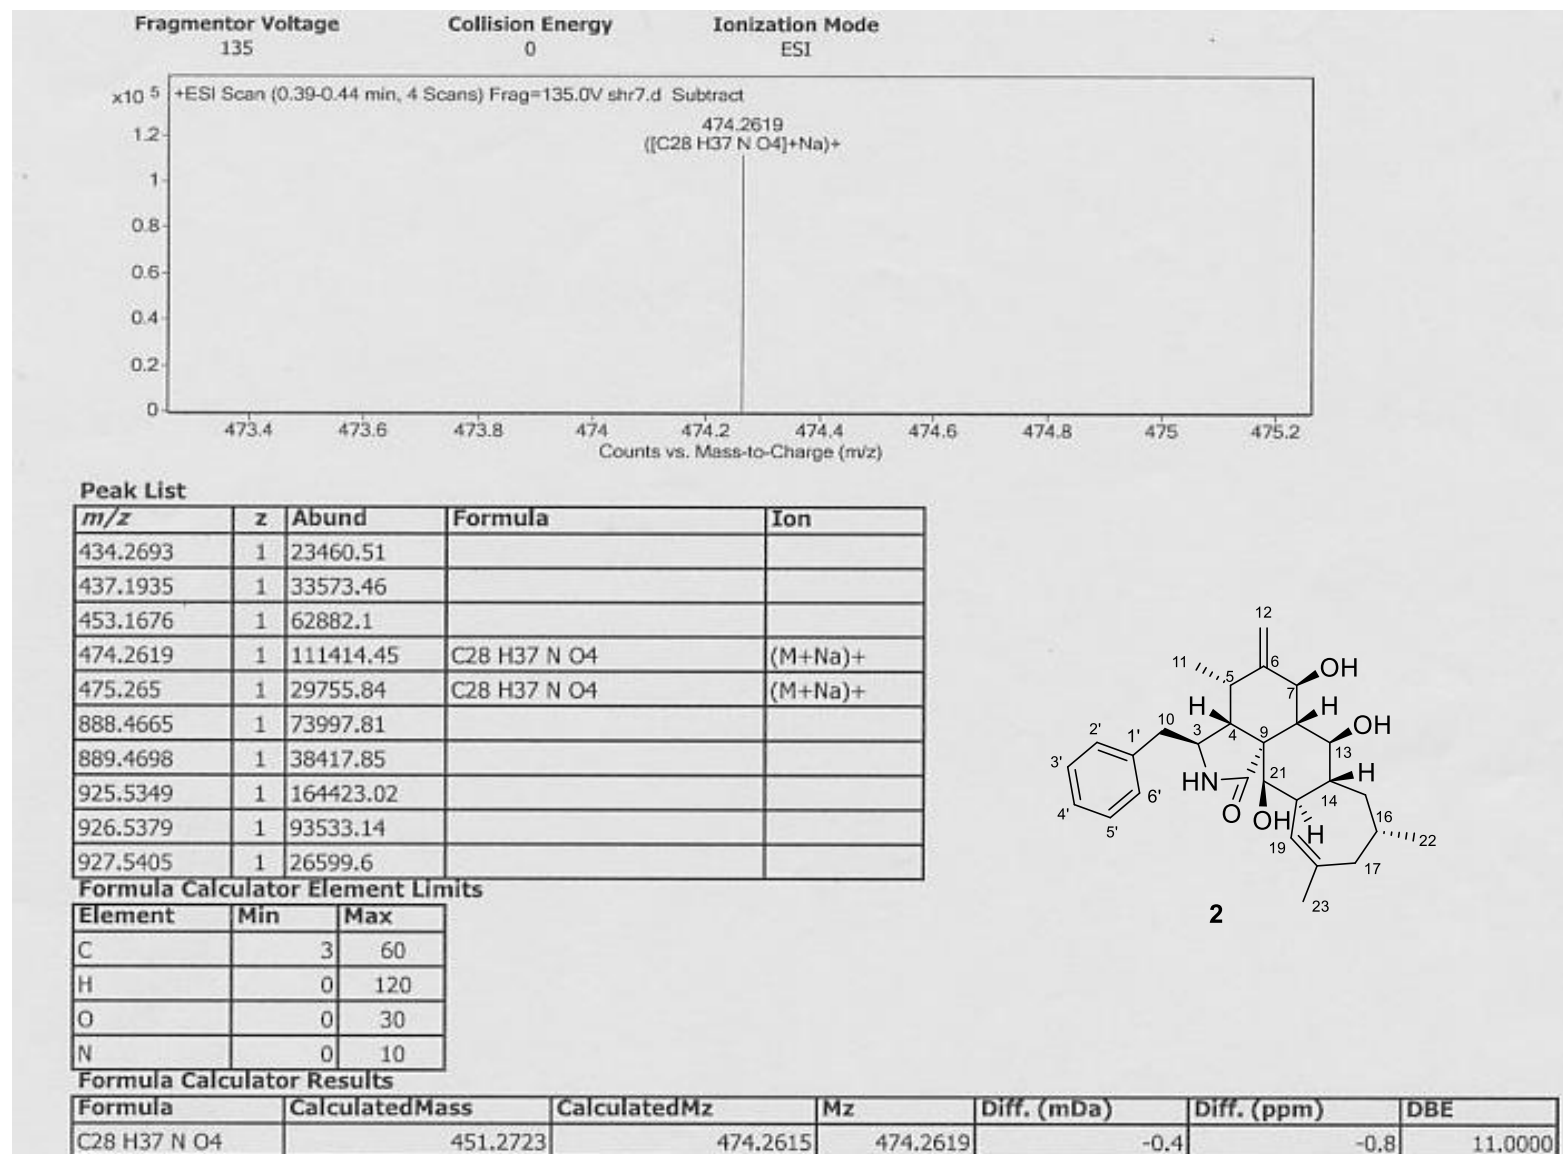

Figure S27. HRESIMS spectrum of **2**.

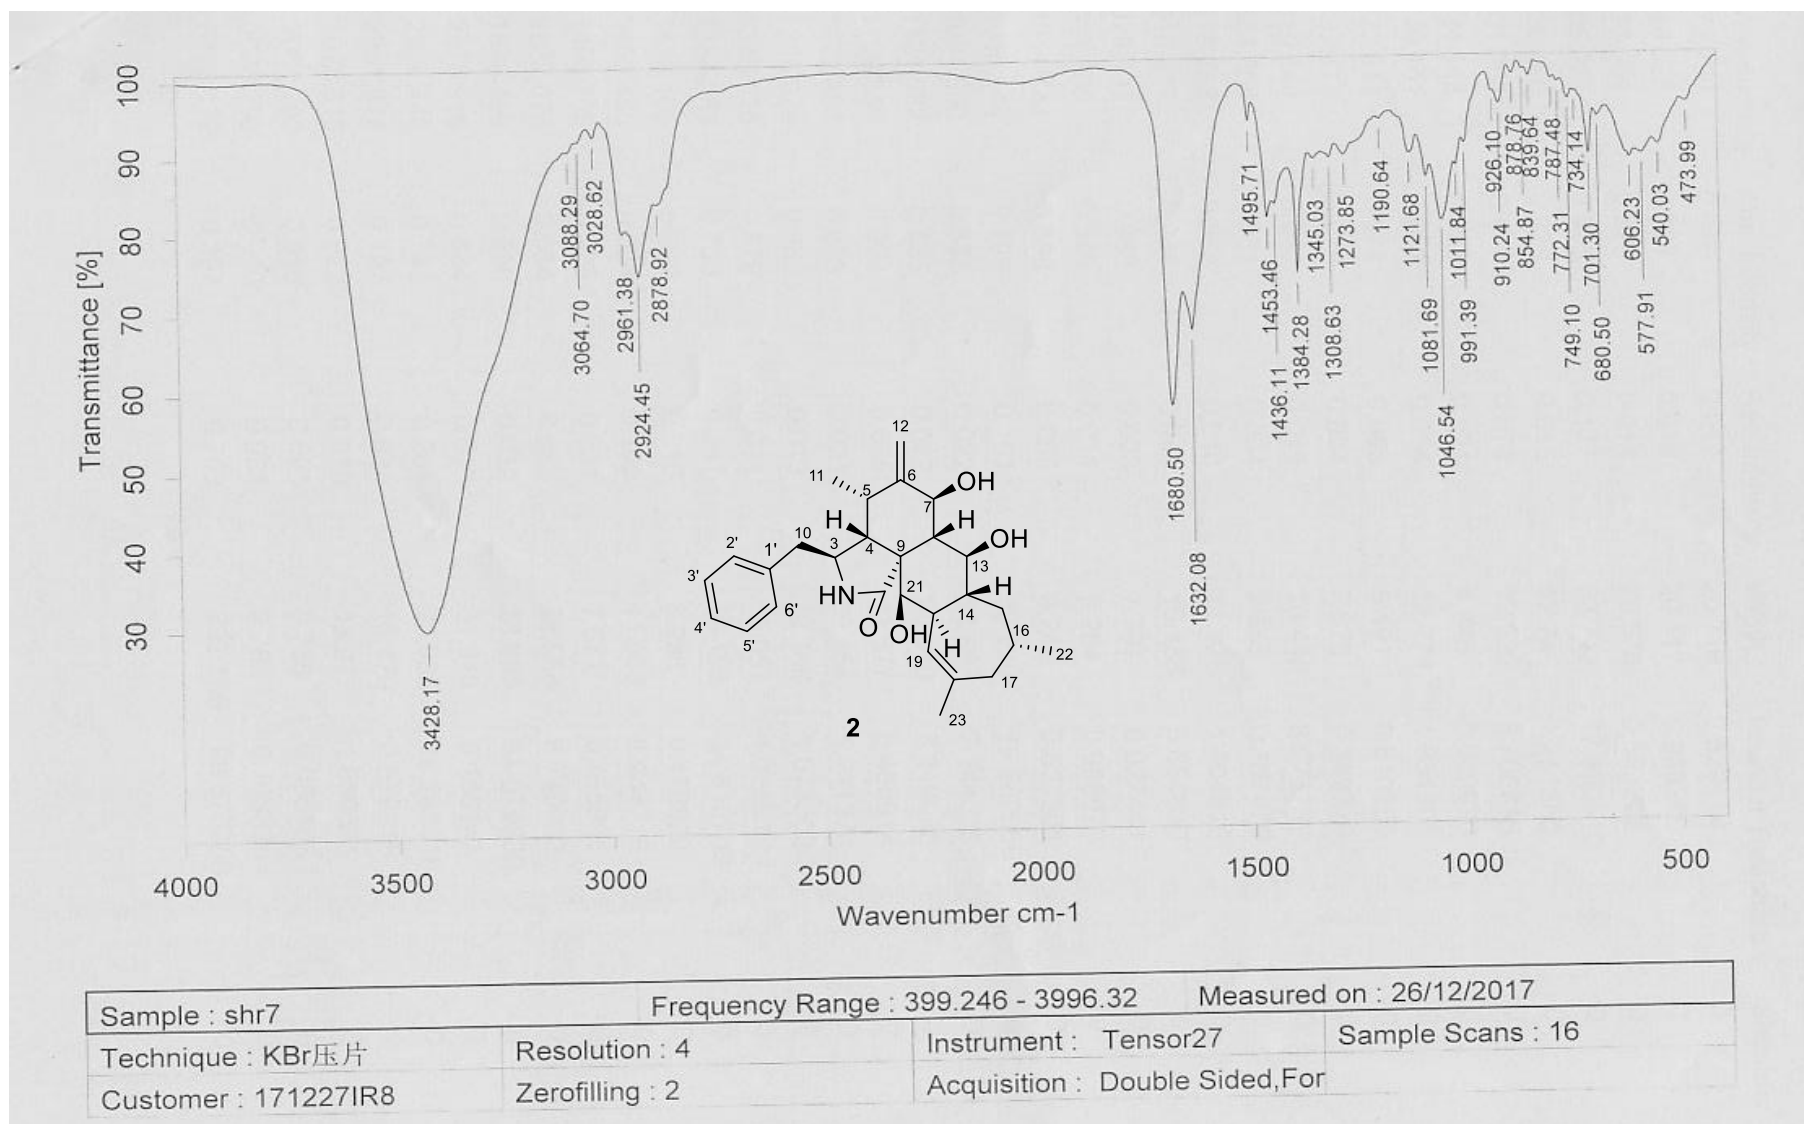

**Figure S28.** IR spectrum of **2**.

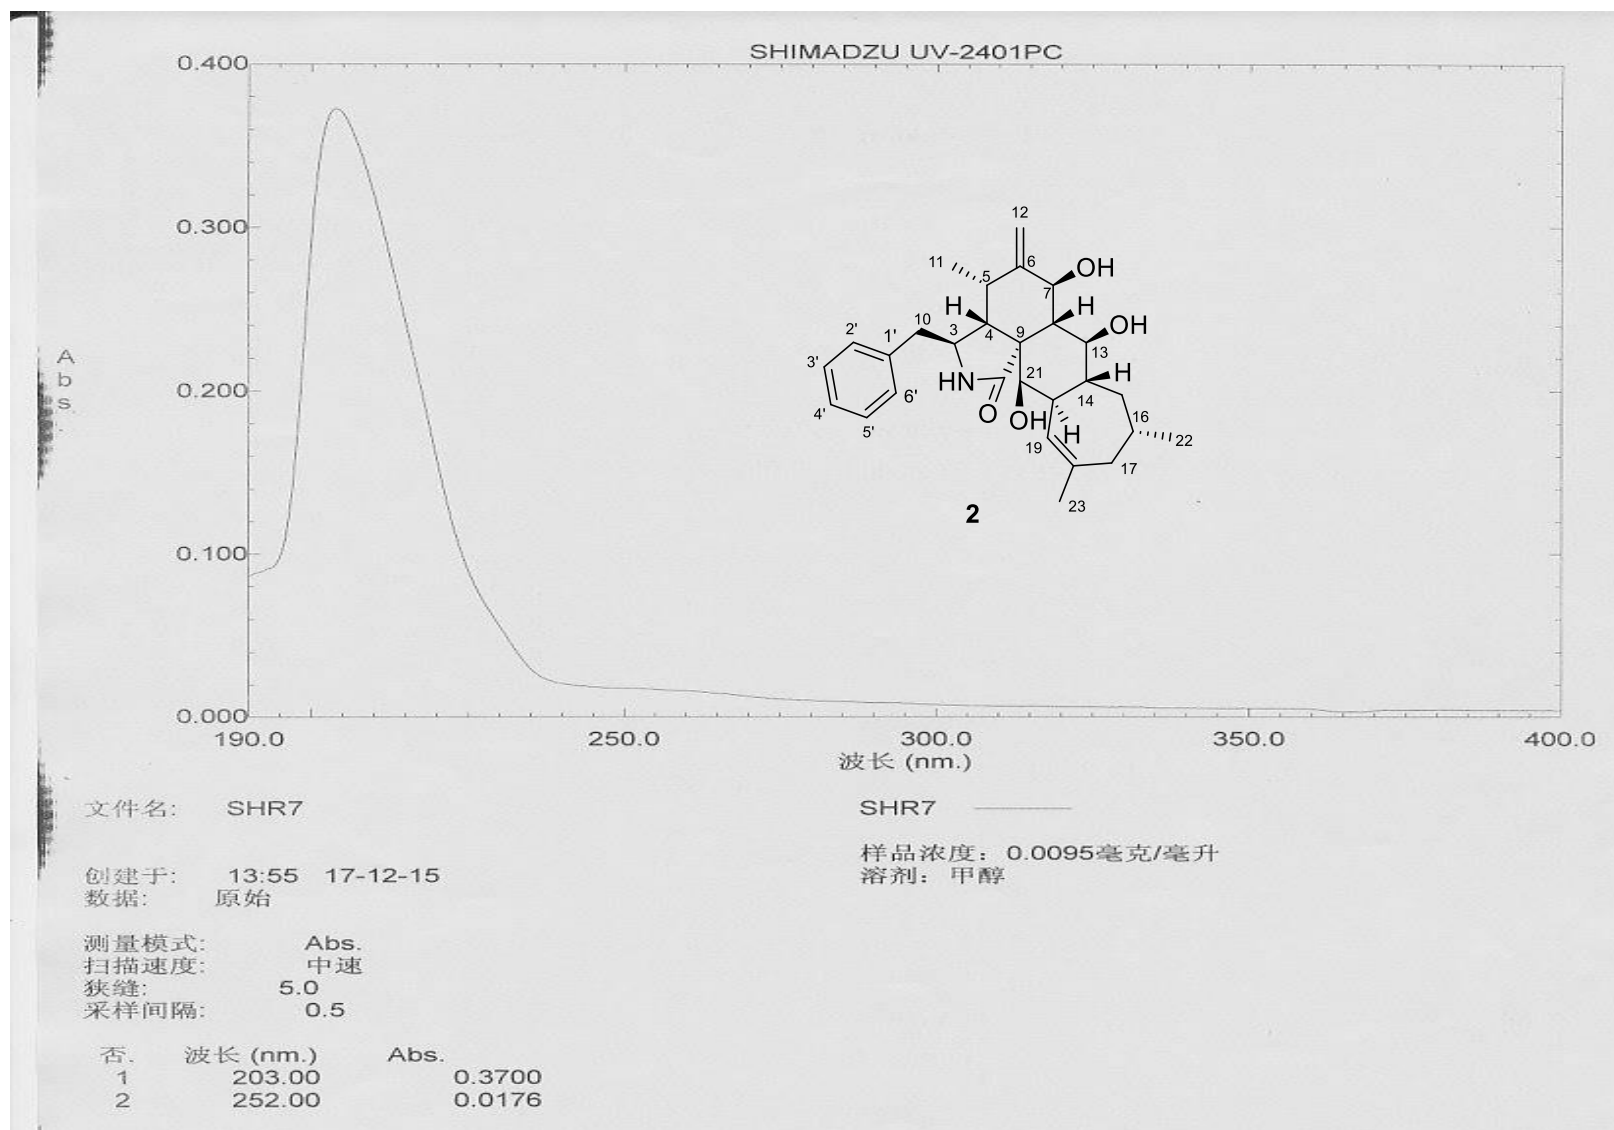

Figure S29. UV spectrum of 2.

Optical rotation measurement

Model : P-1020 (A060460638)

| No.  | Sample   | Mode   | Data    | Monitor<br>Blank | Temp.<br>Cell<br>Temp Point | Date<br>Comment<br>Sample Name                       | Light<br>Filter<br>Operator | Cycle Time<br>Integ Time |
|------|----------|--------|---------|------------------|-----------------------------|------------------------------------------------------|-----------------------------|--------------------------|
| No.1 | 21 (1/3) | Sp.Rot | 30.3330 | 0.0182<br>0.0000 | 18.3<br>50.00<br>Cell       | Fri Nov 24 19:59:50 2017<br>0.00120g/mL MeOH<br>SHR7 | Na<br>589nm                 | 2 sec<br>2 sec           |
| No.2 | 21 (2/3) | Sp.Rot | 33.6670 | 0.0202<br>0.0000 | 18.3<br>50.00<br>Cell       | Fri Nov 24 19:59:56 2017<br>0.00120g/mL MeOH<br>SHR7 | Na<br>589nm                 | 2 sec<br>2 sec           |
| No.3 | 21 (3/3) | Sp.Rot | 29.8330 | 0.0179<br>0.0000 | 18.3<br>50.00<br>Cell       | Fri Nov 24 20:00:01 2017<br>0.00120g/mL MeOH<br>SHR7 | Na<br>589nm                 | 2 sec<br>2 sec           |

+31.2778°

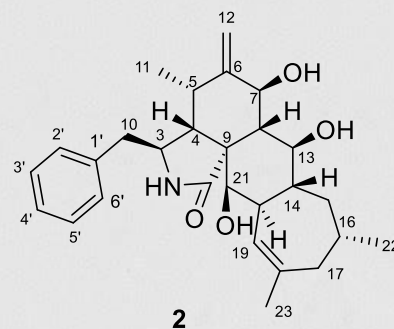

Figure S30. OR spectrum of 2.

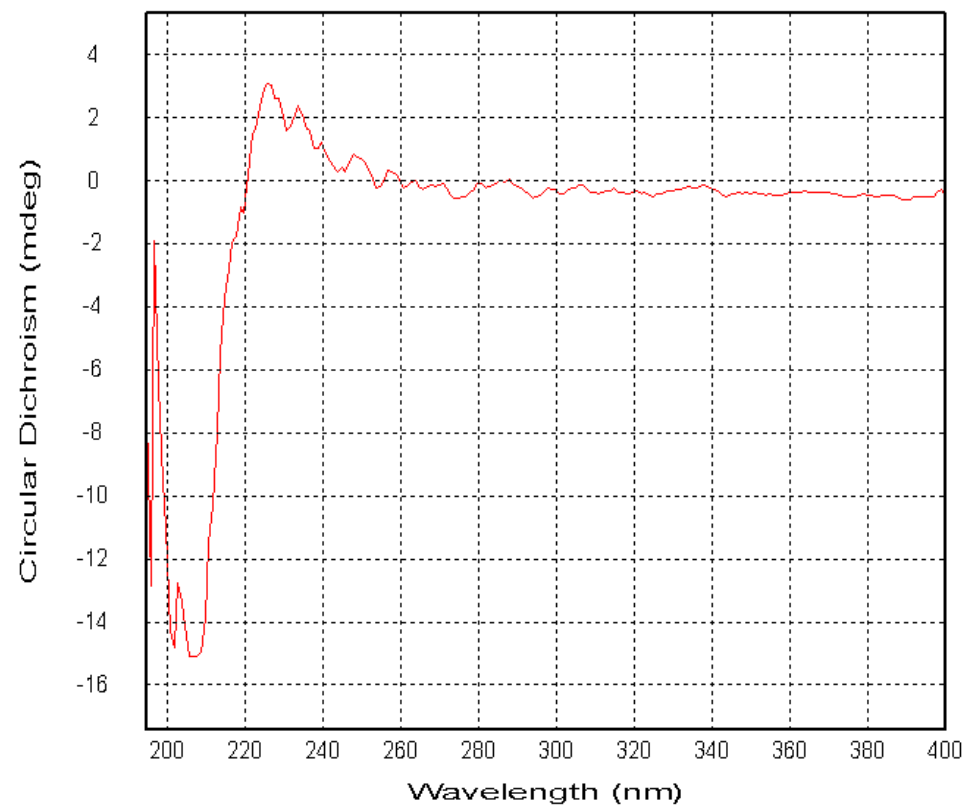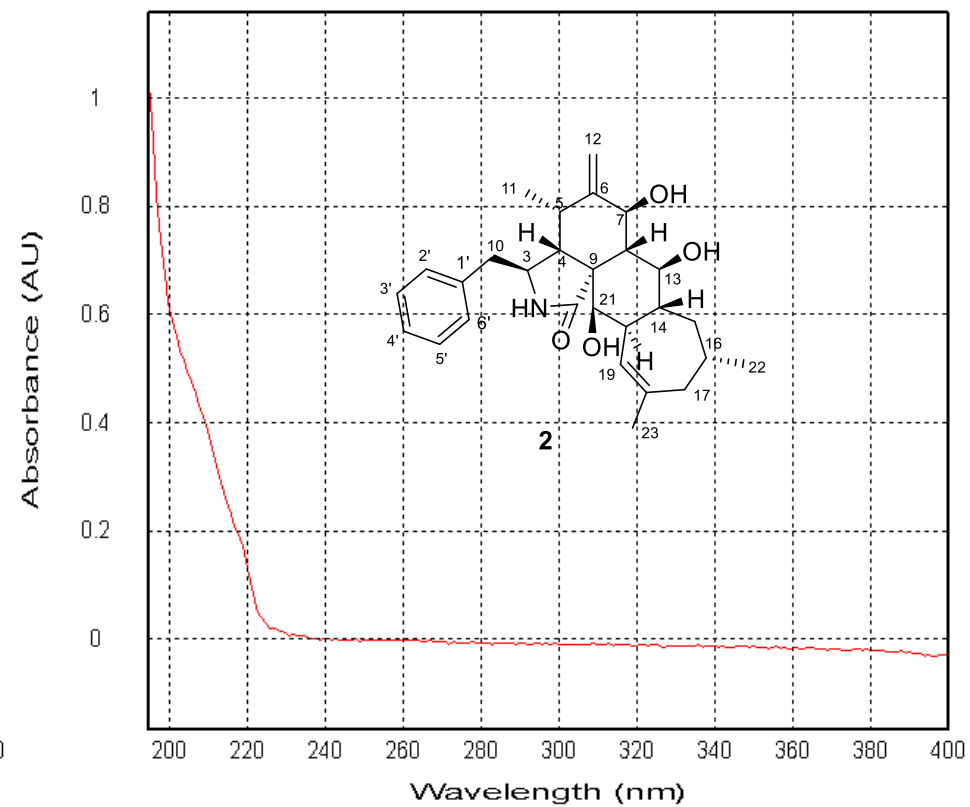

**Figure S31.** CD spectrum of **2**.

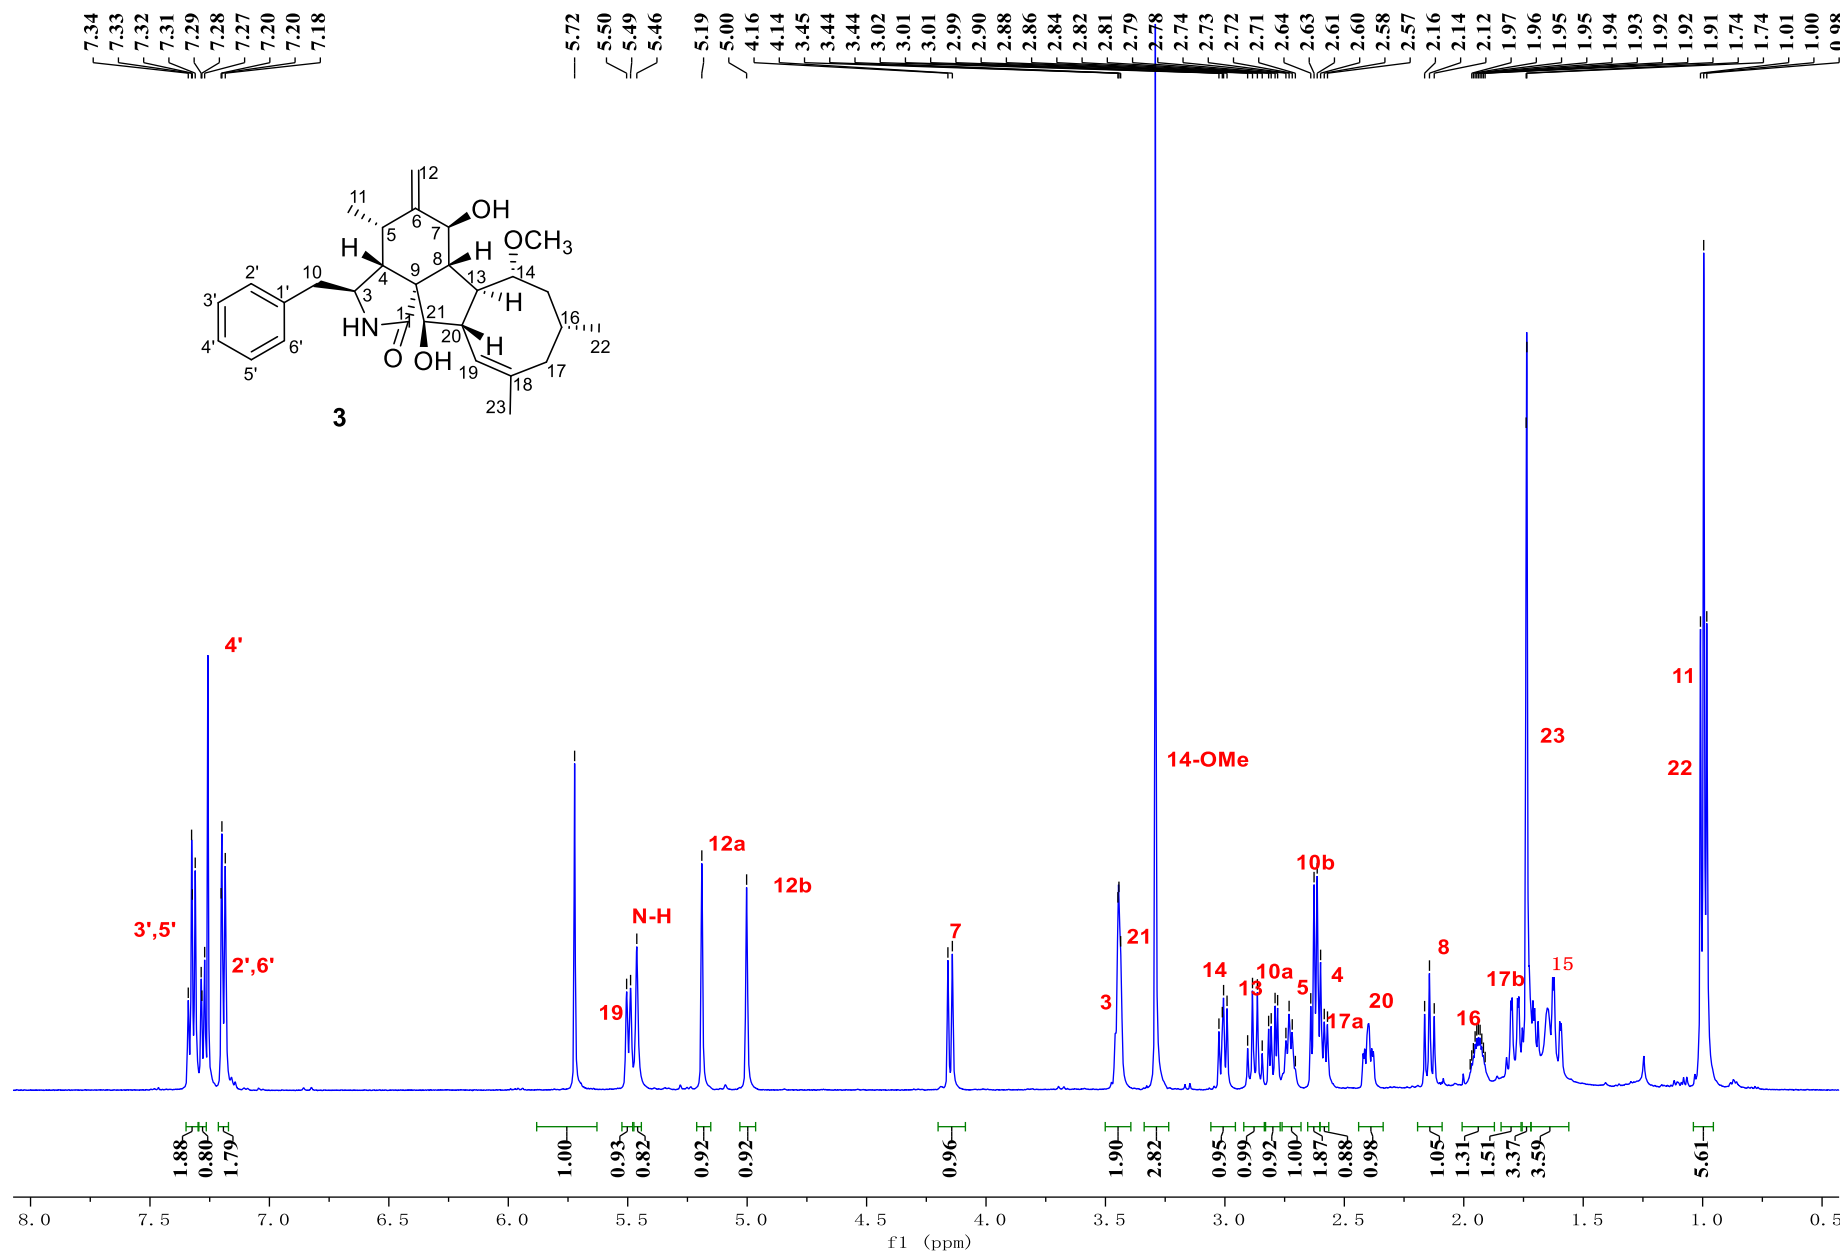

Figure S32. <sup>1</sup>H NMR spectrum of **3** (500 MHz, CDCl<sub>3</sub>).

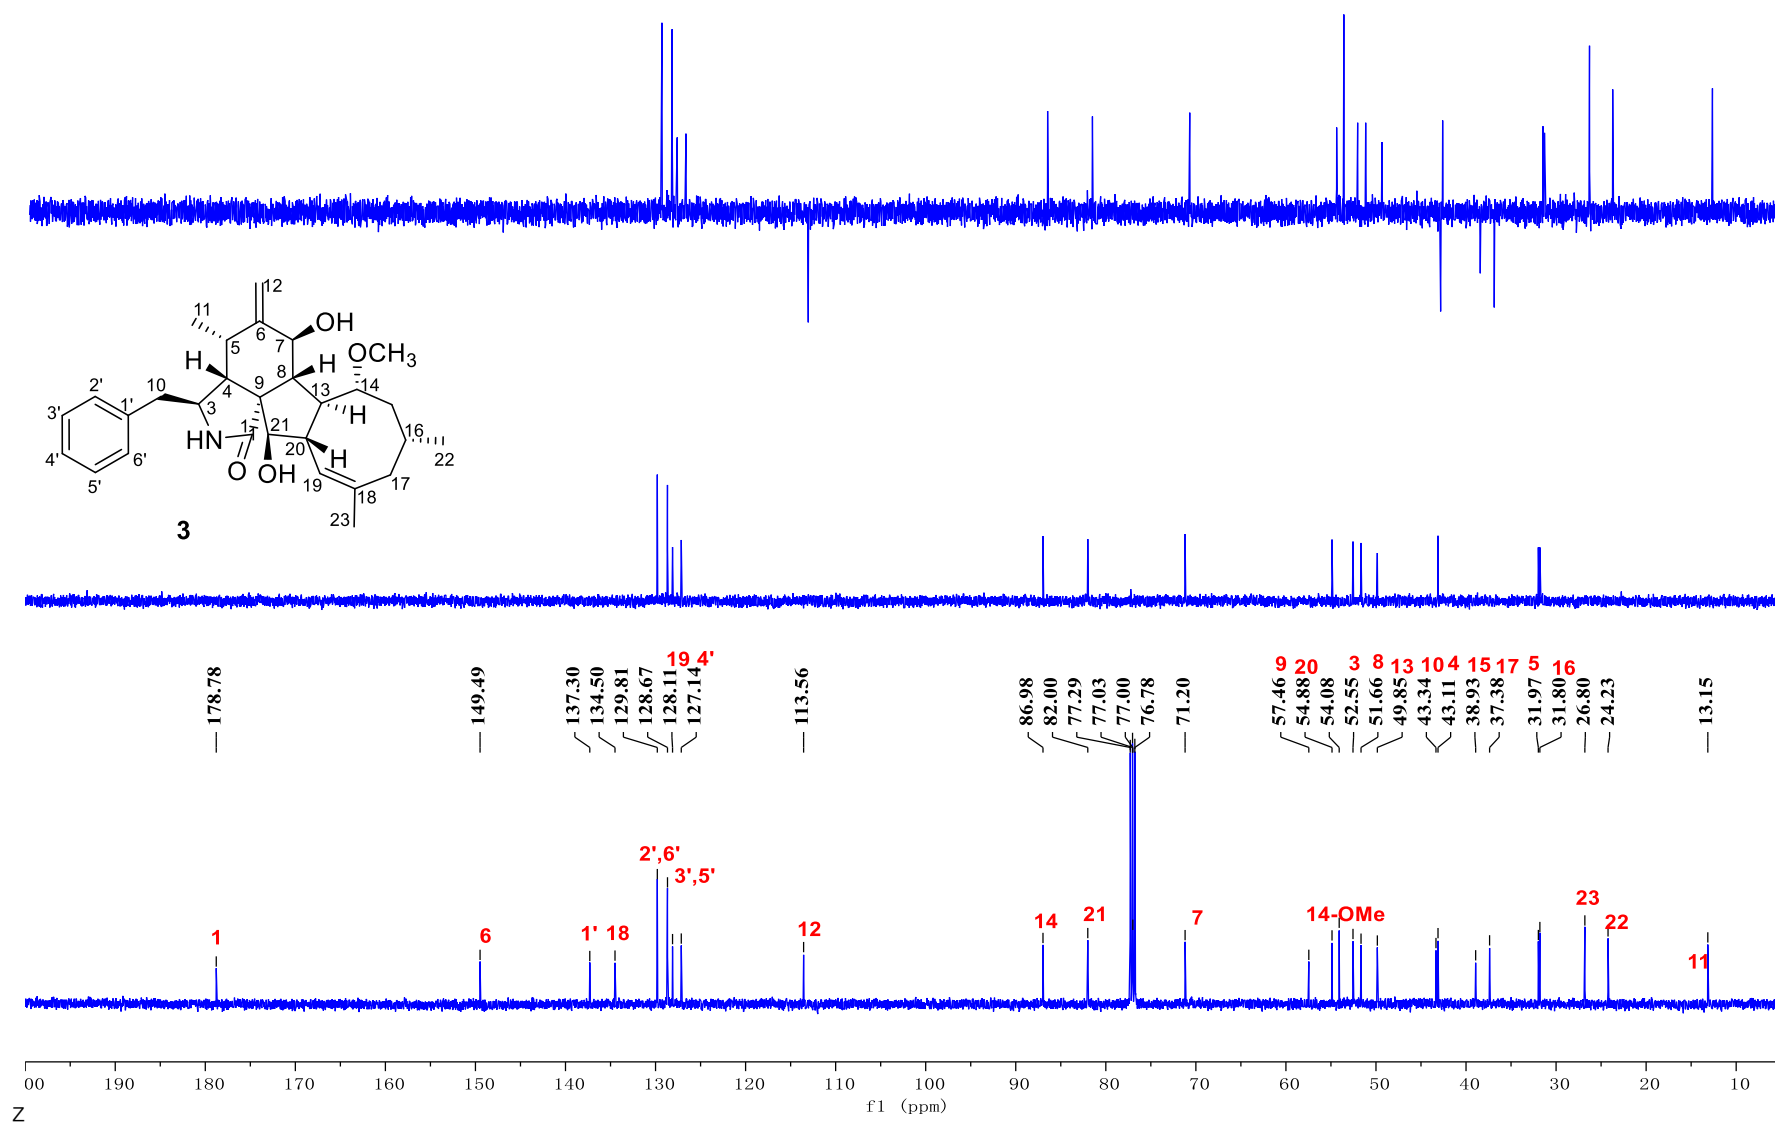

**Figure S33.** <sup>13</sup>C NMR spectrum of **3** (125 MHz, CDCl<sub>3</sub>).

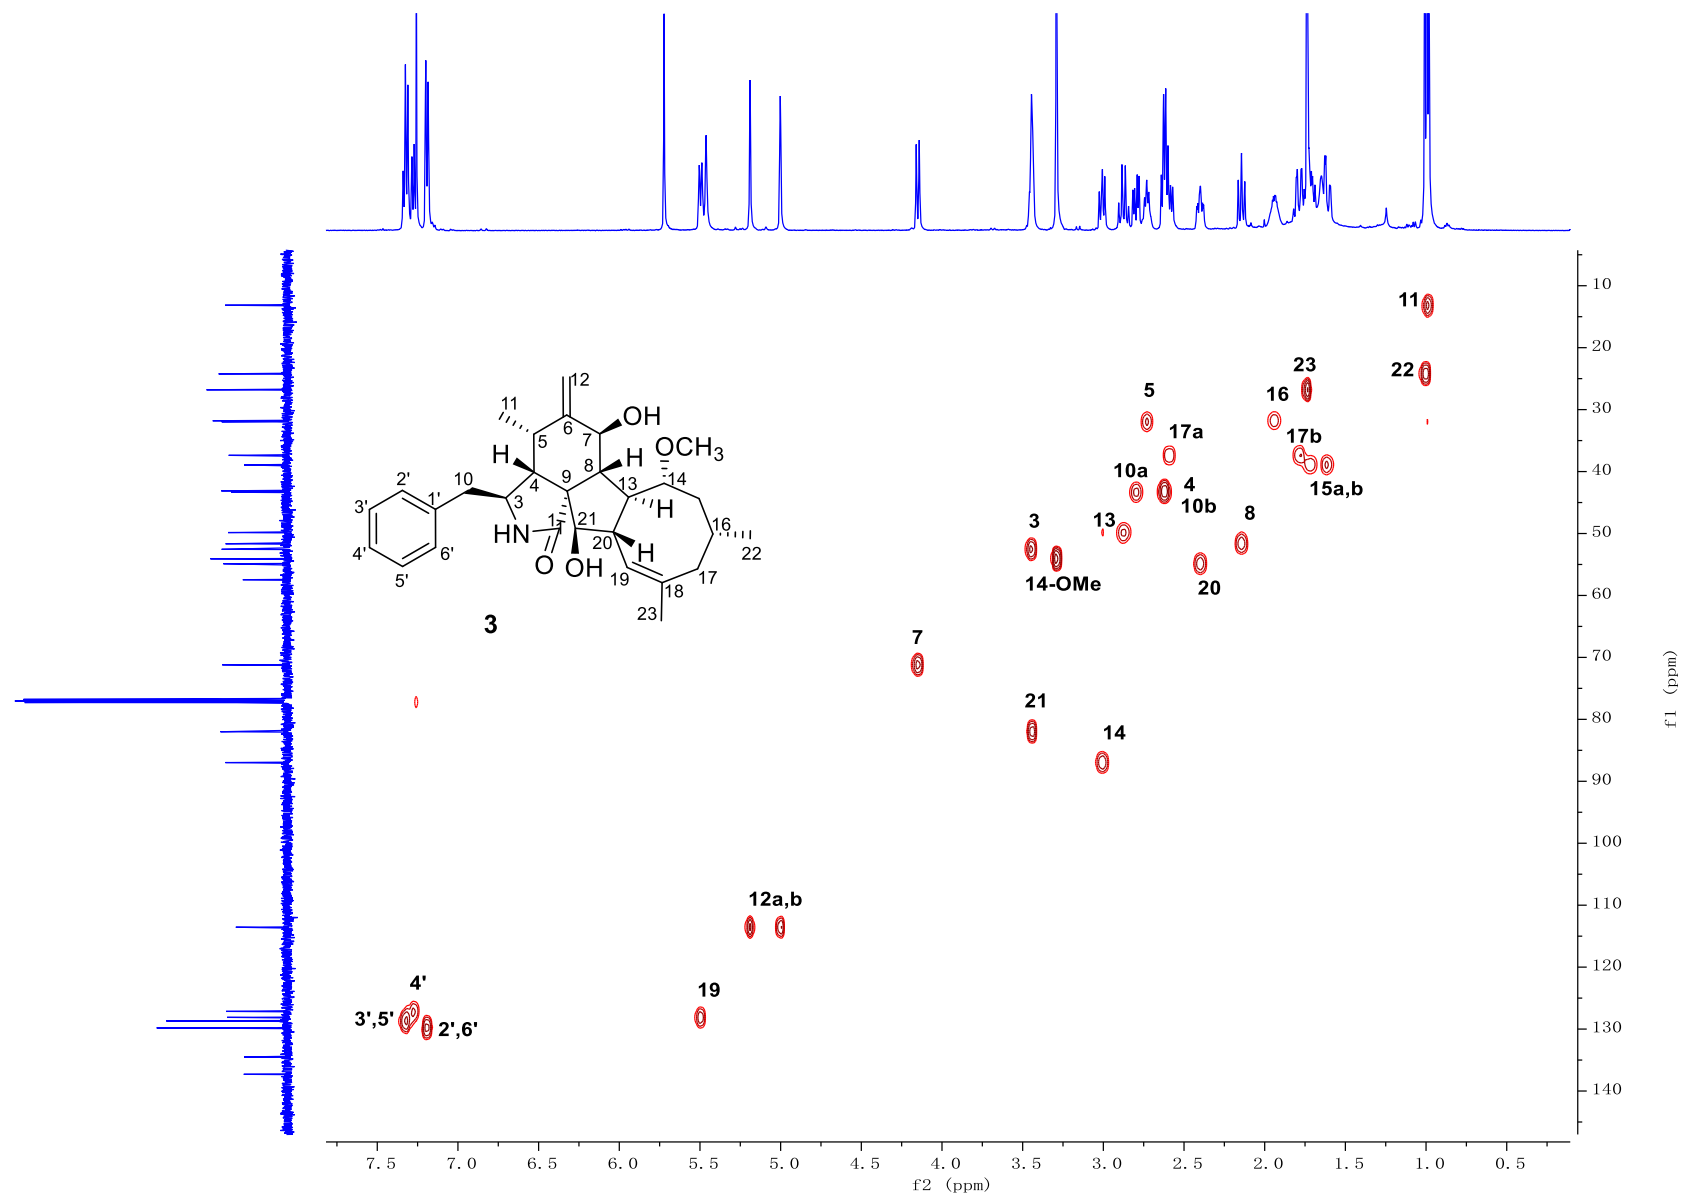

**Figure S34.** HSQC spectrum of **3** ( $\text{CDCl}_3$ ).

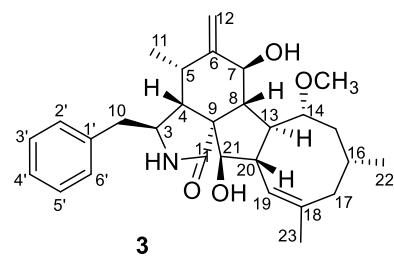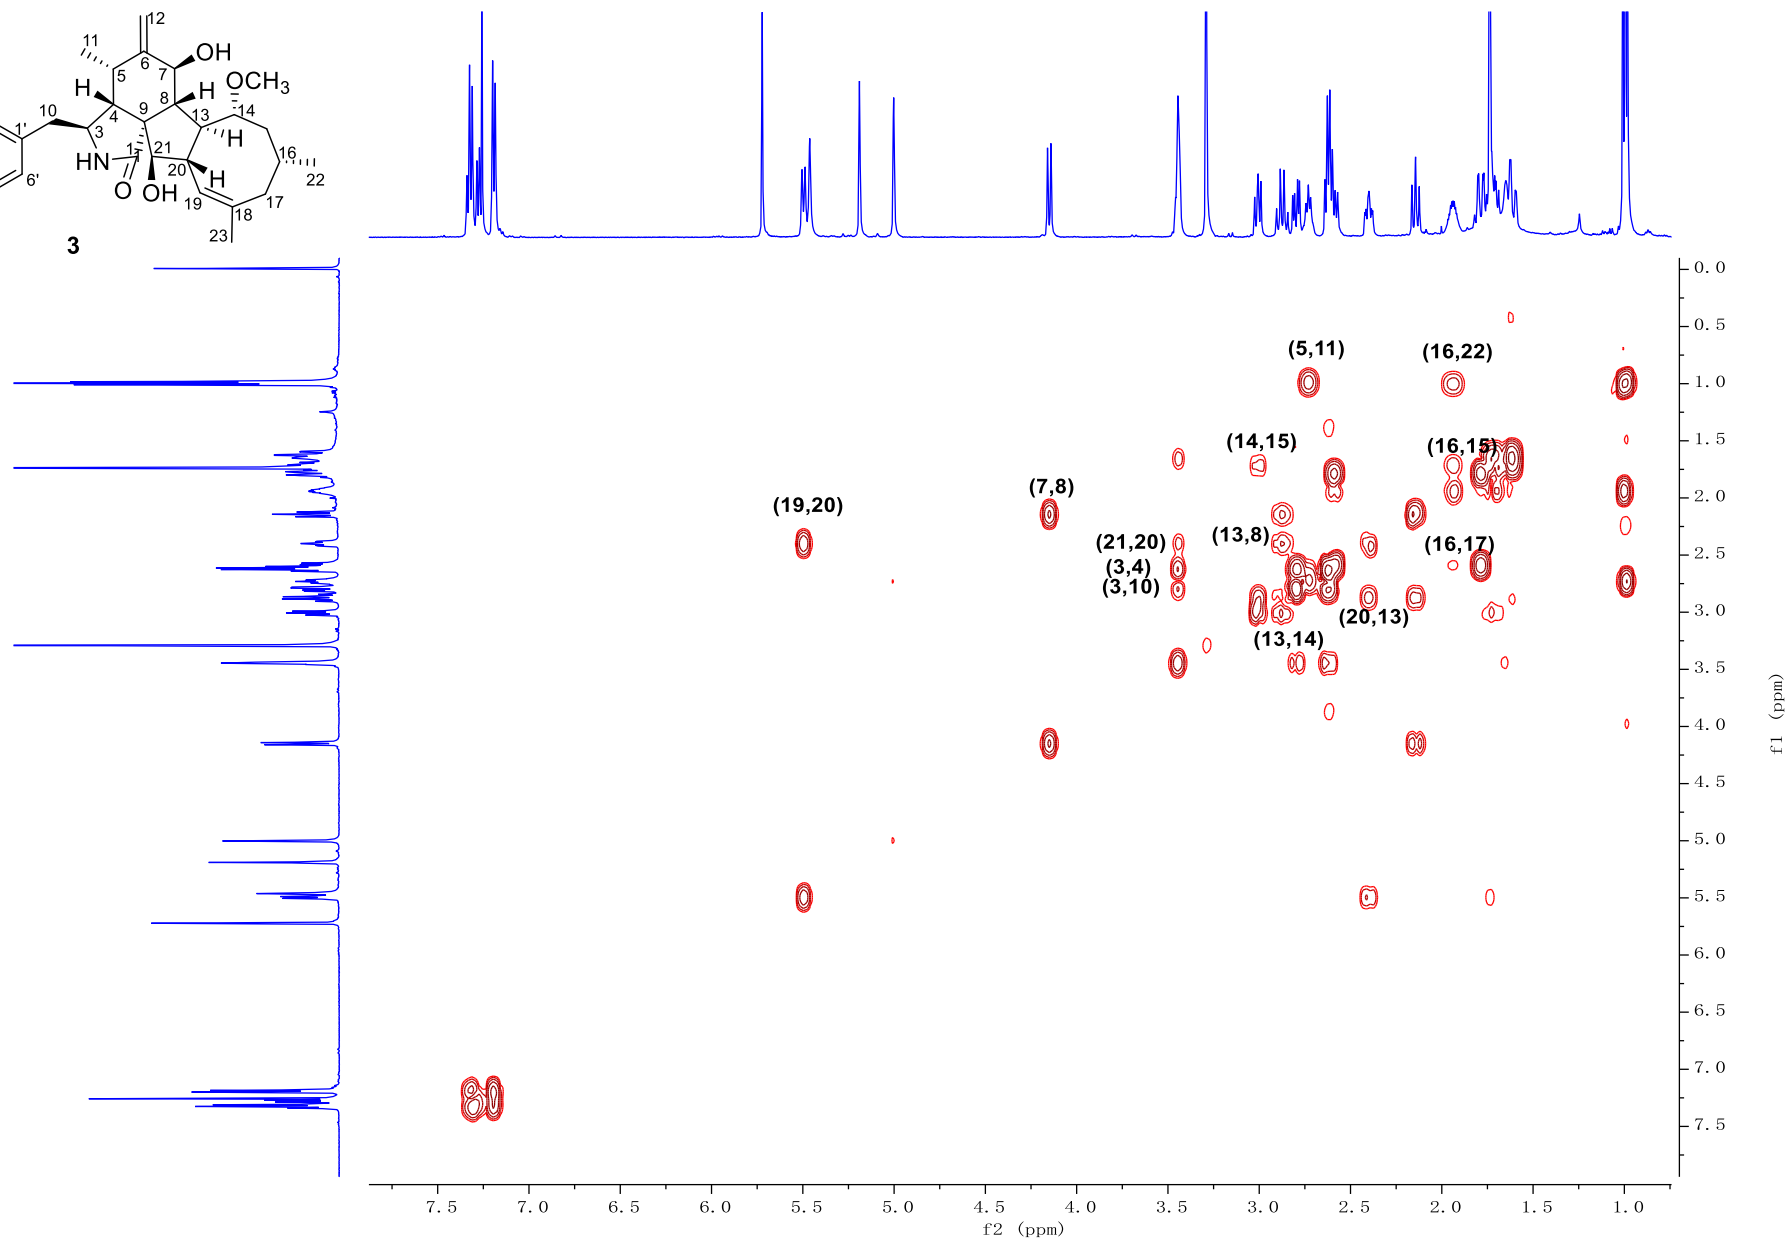

**Figure S35.**  $^1\text{H}$ - $^1\text{H}$  COSY spectrum of **3** ( $\text{CDCl}_3$ ).

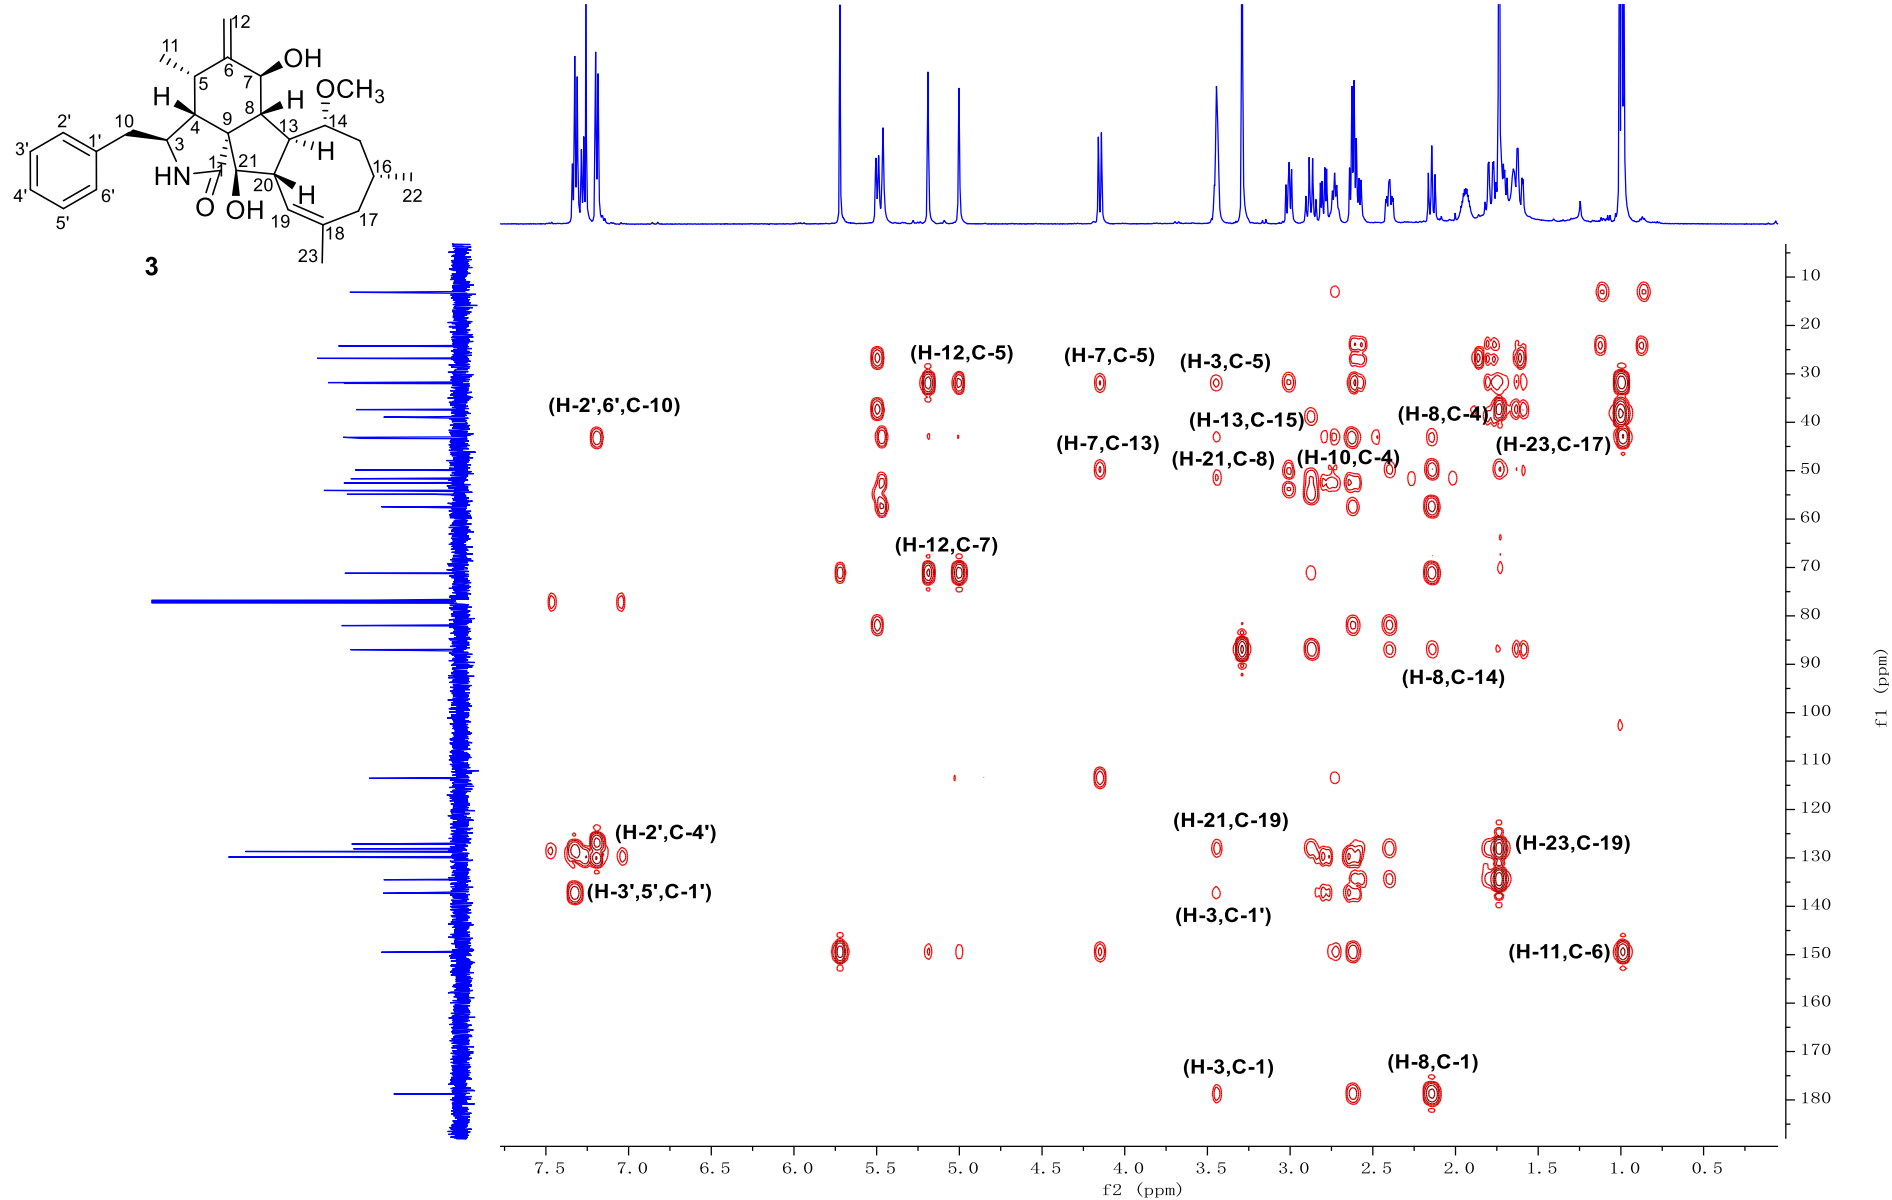

Figure S36. HMBC spectrum of **3** (CDCl<sub>3</sub>).

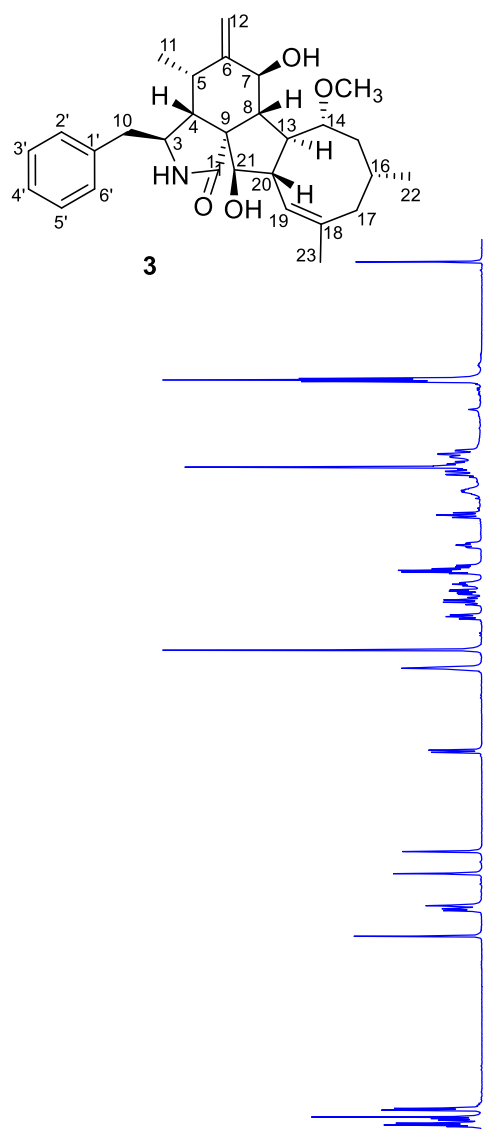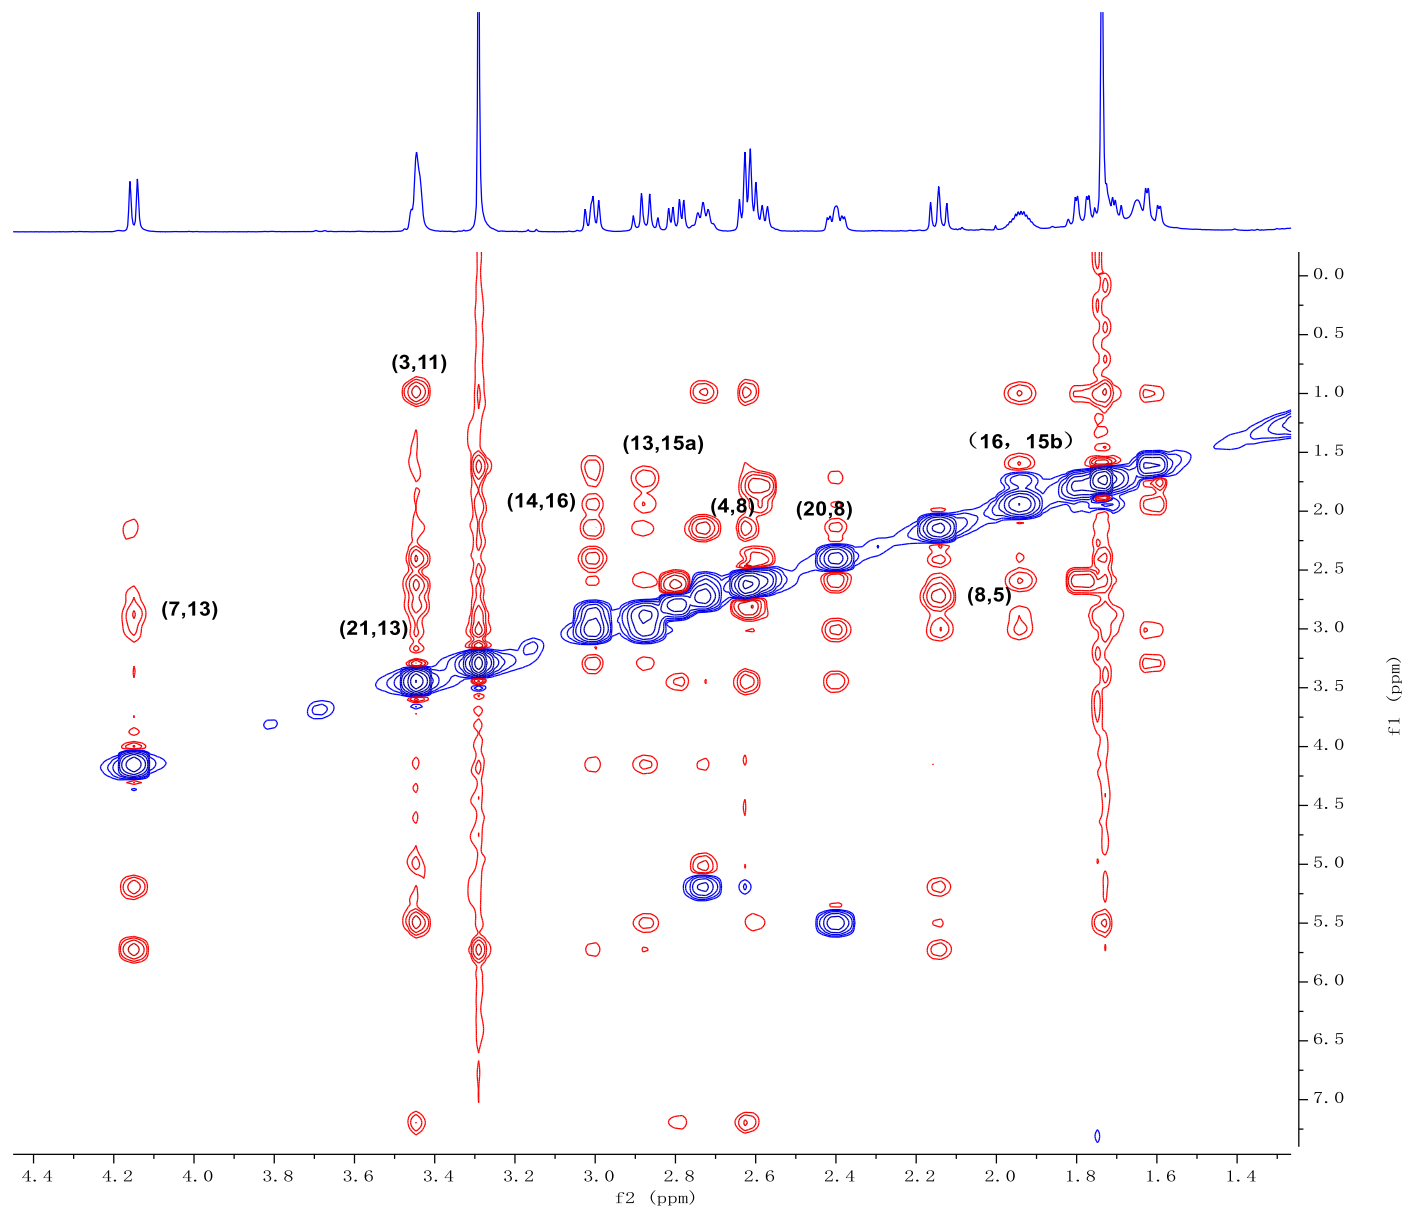

Figure S37. ROESY spectrum of **3** (CDCl<sub>3</sub>).

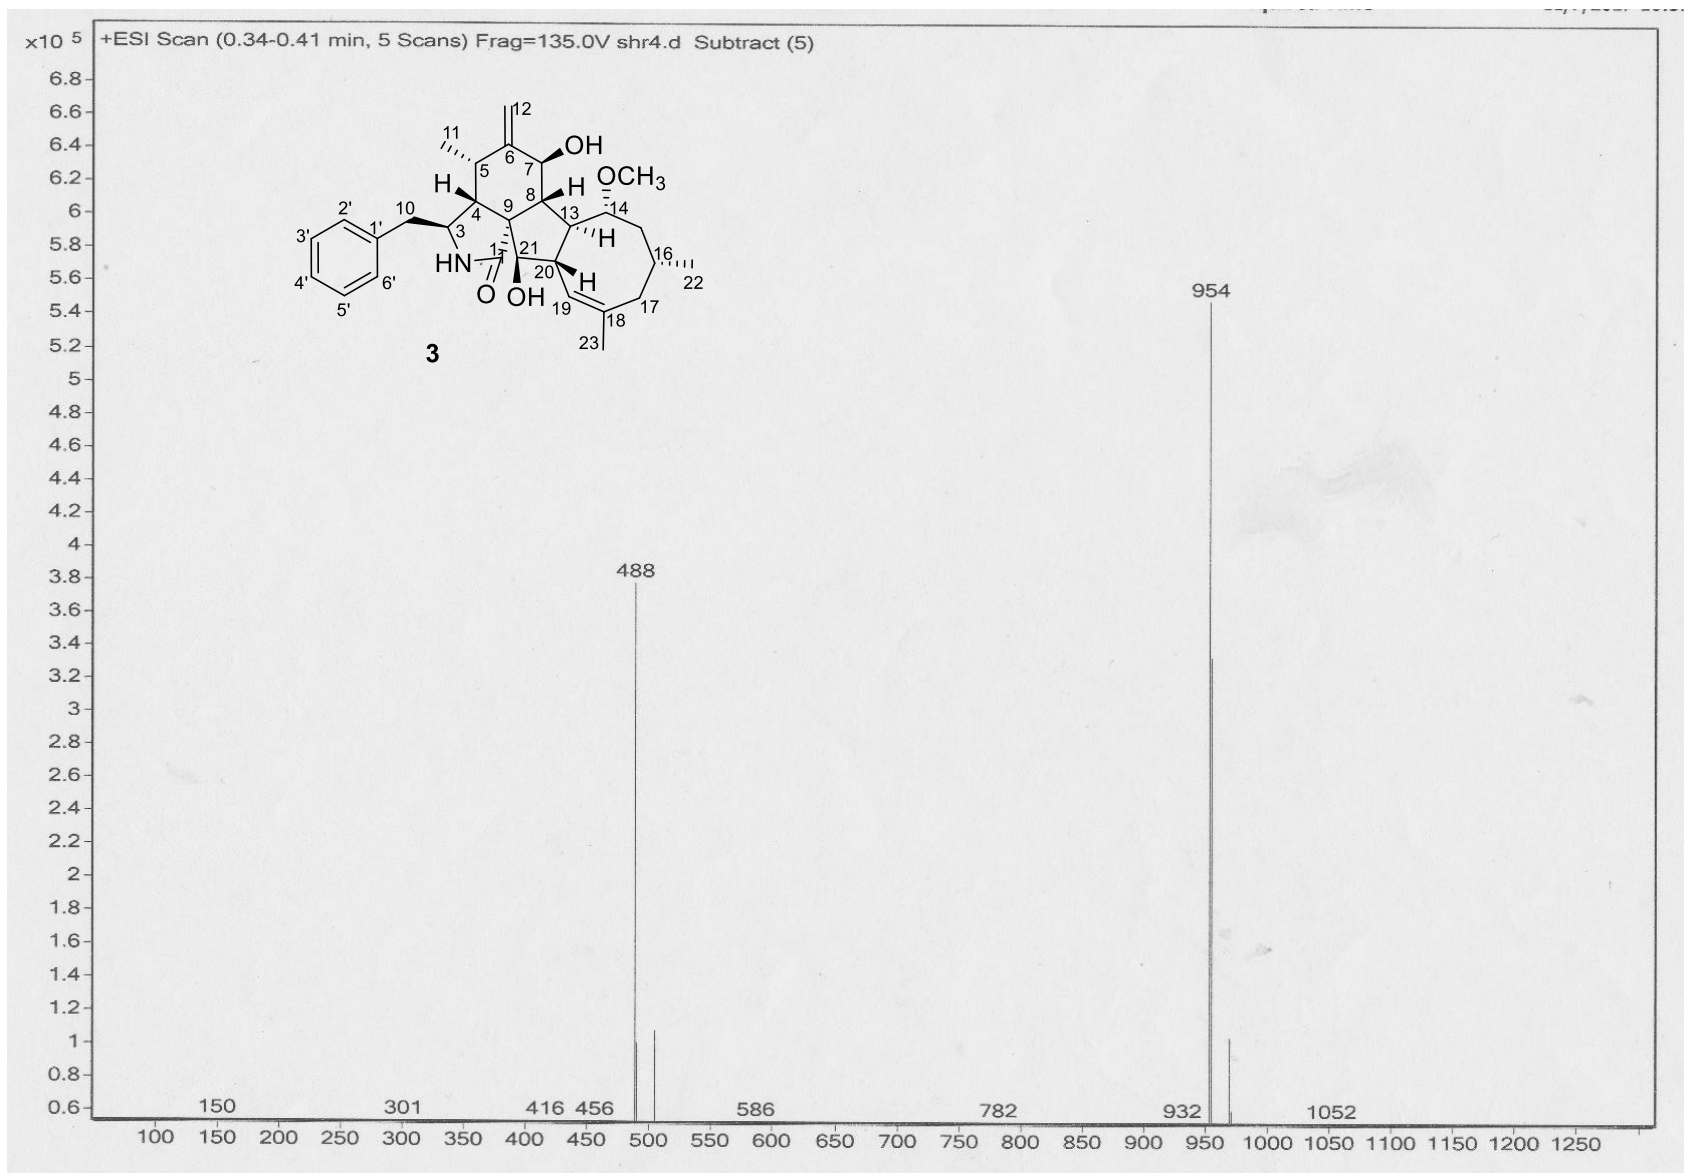

Figure S38. ESIMS spectrum of **3**.

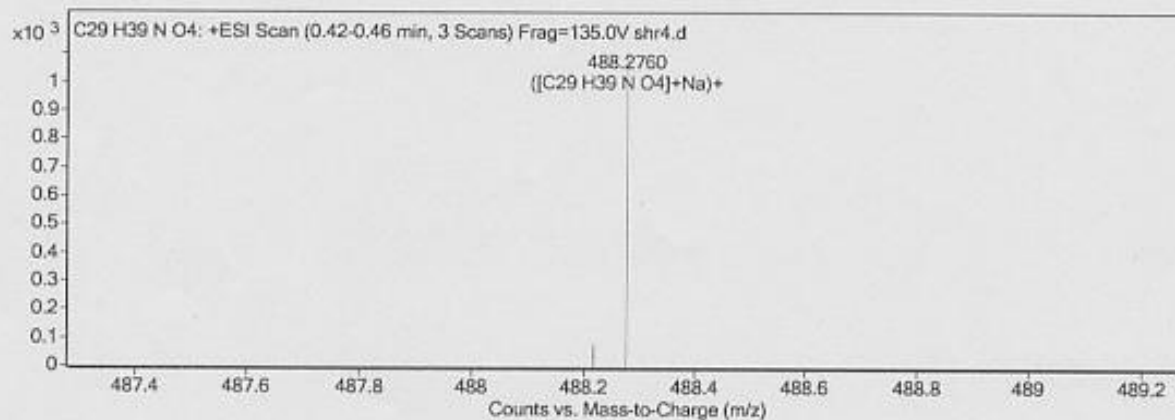

#### Peak List

| m/z      | z | Abund   |
|----------|---|---------|
| 102.1278 |   | 3106.06 |
| 107.041  |   | 3166.07 |
| 121.0509 | 1 | 5591.72 |
| 128.9536 |   | 3024.99 |
| 175.1441 |   | 3056.36 |
| 245.0781 | 1 | 3708.04 |
| 472.2252 | 1 | 2333.29 |
| 548.2403 | 1 | 3488.01 |
| 922.0098 | 1 | 7629.48 |
| 959.9649 | 1 | 4919.65 |

#### Formula Calculator Element Limits

| Element | Min | Max |
|---------|-----|-----|
| C       | 3   | 60  |
| H       | 0   | 120 |
| O       | 0   | 30  |
| N       | 0   | 10  |

#### Formula Calculator Results

| Formula      | CalculatedMass | CalculatedMz | Mz       | Diff. (mDa) | Diff. (ppm) | DBE     |
|--------------|----------------|--------------|----------|-------------|-------------|---------|
| C29 H39 N O4 | 465.2879       | 488.2771     | 488.2760 | 0.3         | 0.7         | 11.0000 |

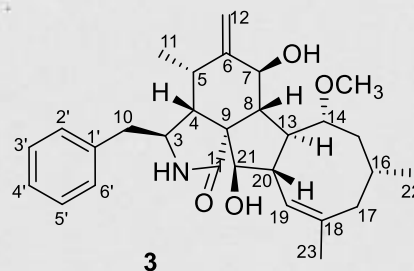

Figure S39. HRESIMS spectrum of 3.

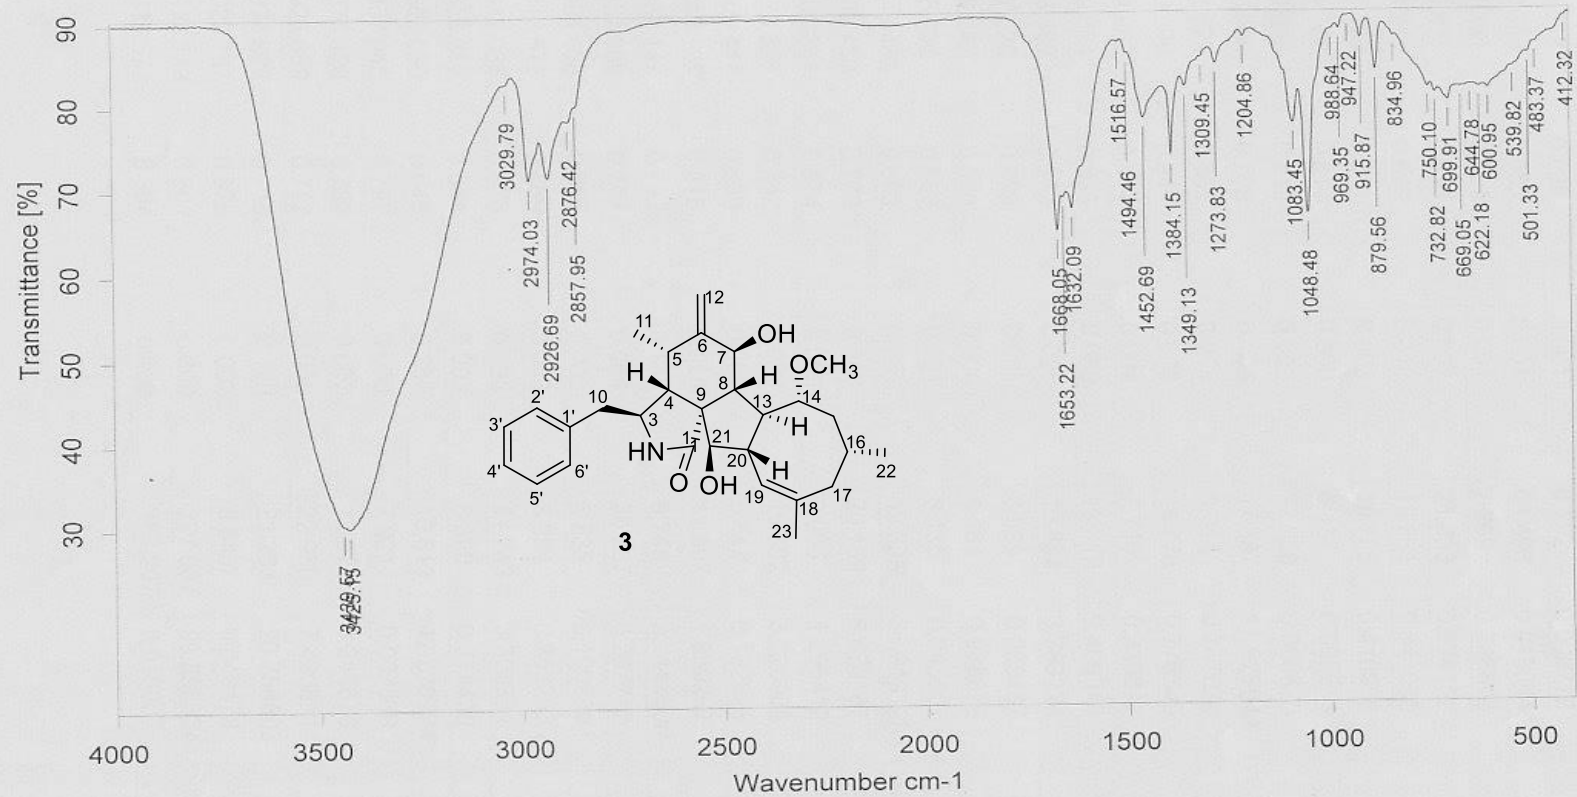

|                       |                 |                                     |  |                          |  |
|-----------------------|-----------------|-------------------------------------|--|--------------------------|--|
| Sample : shr4         |                 | Frequency Range : 399.246 - 3996.32 |  | Measured on : 07/03/2018 |  |
| Technique : KBr       | Resolution : 4  | Instrument : Tensor27               |  | Sample Scans : 16        |  |
| Filename : 180307IR.5 | Zerofilling : 2 | Acquisition : Double Sided, For     |  |                          |  |

Figure S40. IR spectrum of 3.

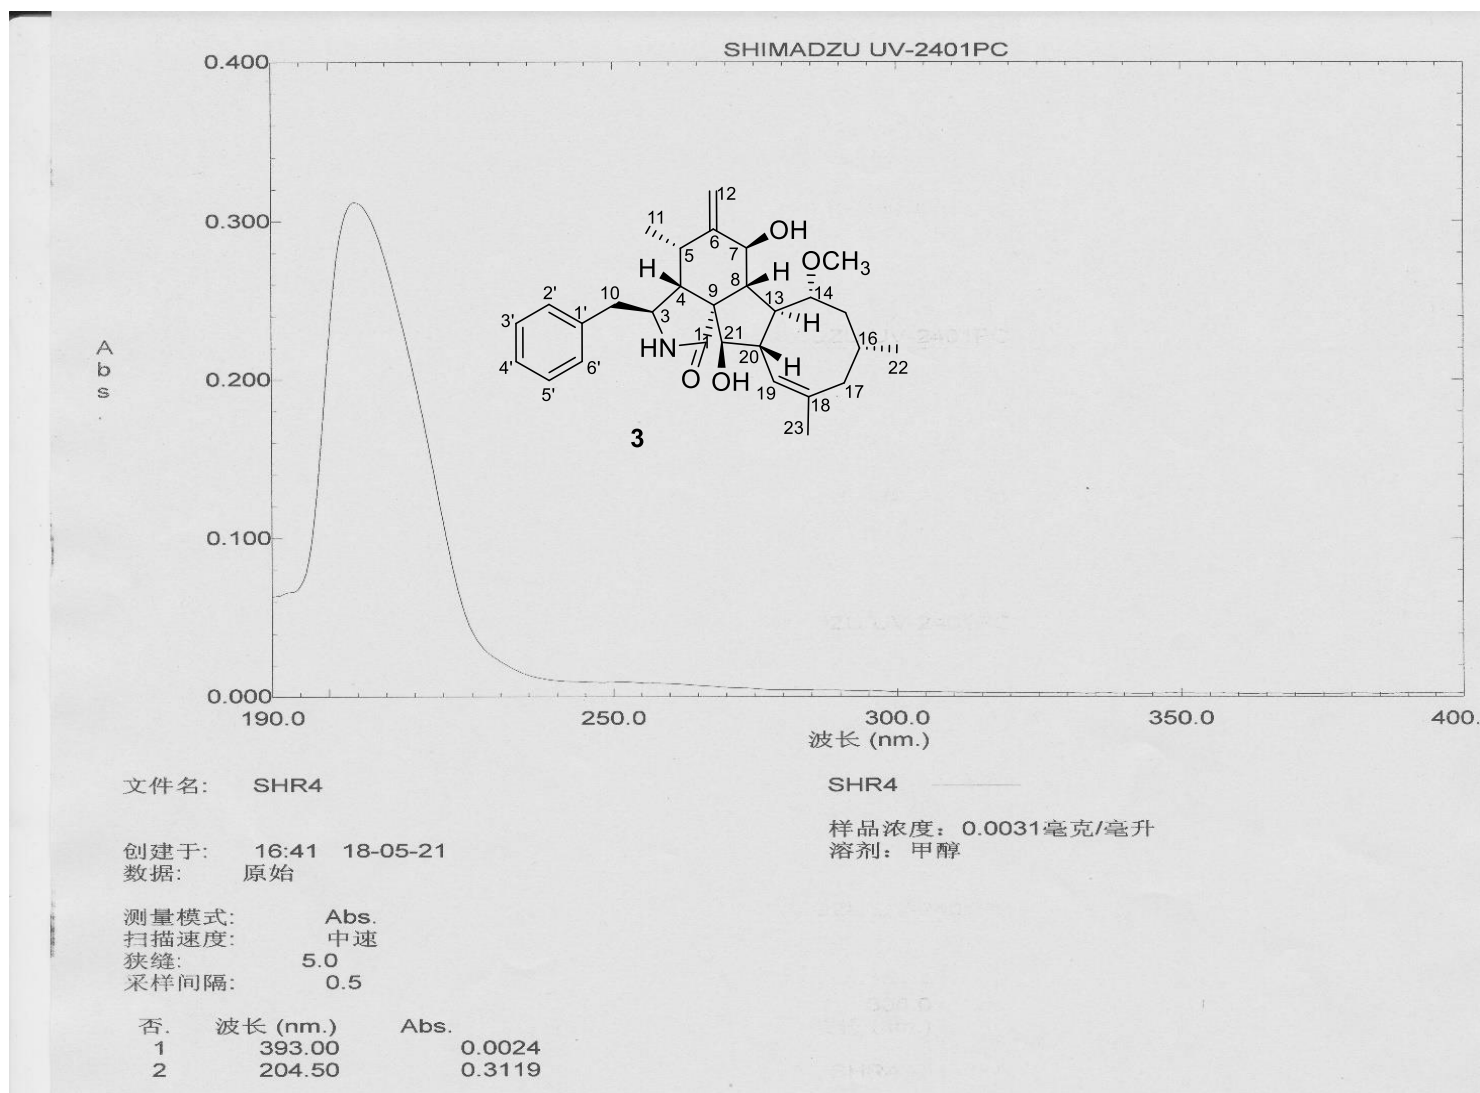

Figure S41. UV spectrum of 3.

Optical rotation measurement

Model : P-1020 (A060460638)

| No.  | Sample  | Mode   | Data    | Monitor<br>Blank | Temp.<br>Cell<br>Temp Point | Date<br>Comment<br>Sample Name                       | Light<br>Filter<br>Operator | Cycle Time<br>Integ Time |
|------|---------|--------|---------|------------------|-----------------------------|------------------------------------------------------|-----------------------------|--------------------------|
| No.1 | 7 (1/3) | Sp.Rot | 35.4550 | 0.0039<br>0.0000 | 25.1<br>10.00<br>Cell       | Mon May 14 14:00:30 2018<br>0.00110g/mL MeOH<br>SHR4 | Na<br>589nm                 | 2 sec<br>2 sec           |
| No.2 | 7 (2/3) | Sp.Rot | 37.2730 | 0.0041<br>0.0000 | 25.1<br>10.00<br>Cell       | Mon May 14 14:00:35 2018<br>0.00110g/mL MeOH<br>SHR4 | Na<br>589nm                 | 2 sec<br>2 sec           |
| No.3 | 7 (3/3) | Sp.Rot | 35.4550 | 0.0039<br>0.0000 | 25.1<br>10.00<br>Cell       | Mon May 14 14:00:40 2018<br>0.00110g/mL MeOH<br>SHR4 | Na<br>589nm                 | 2 sec<br>2 sec           |

+36.0606°

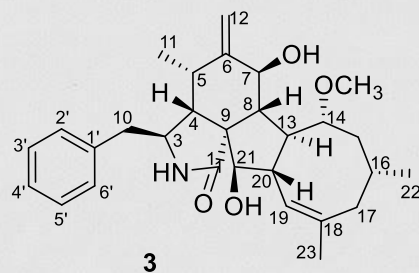

Figure S42. ORD spectrum of 3.

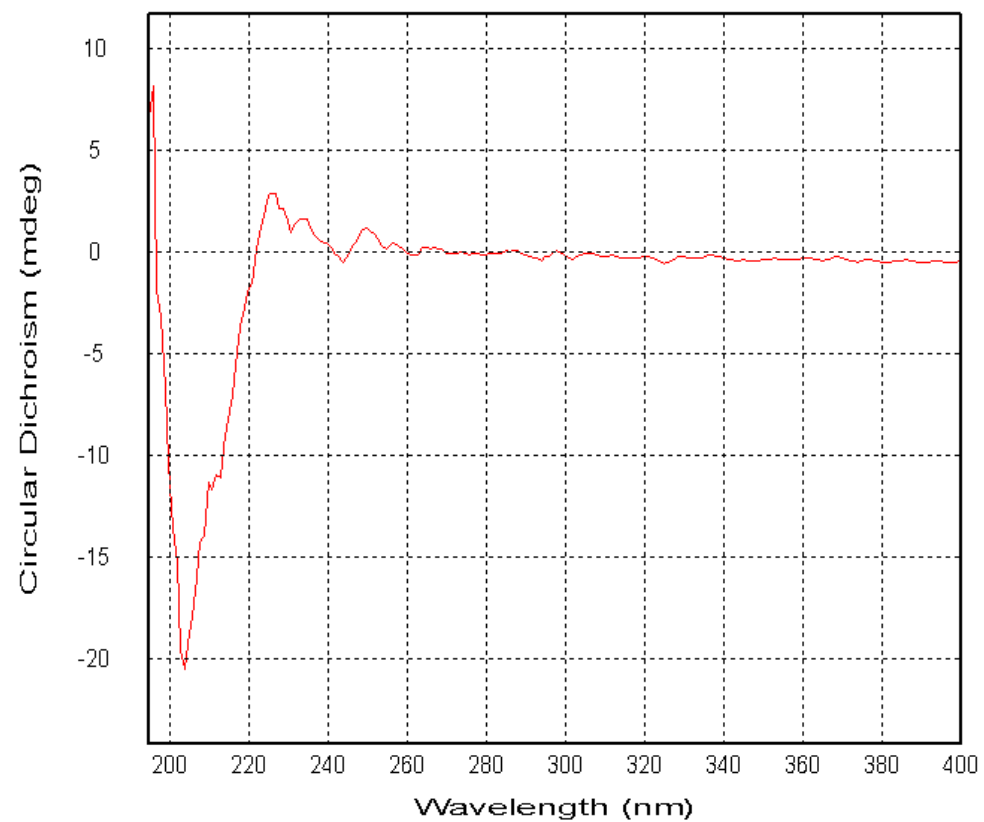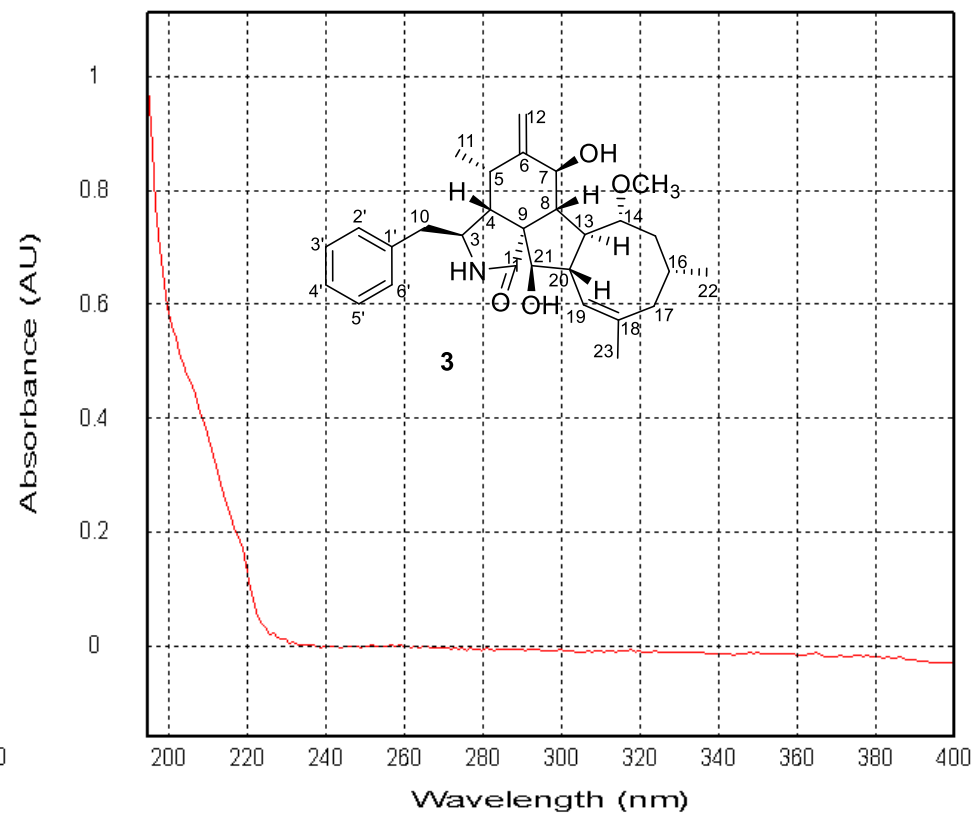

**Figure S43.** CD spectrum of **3**.

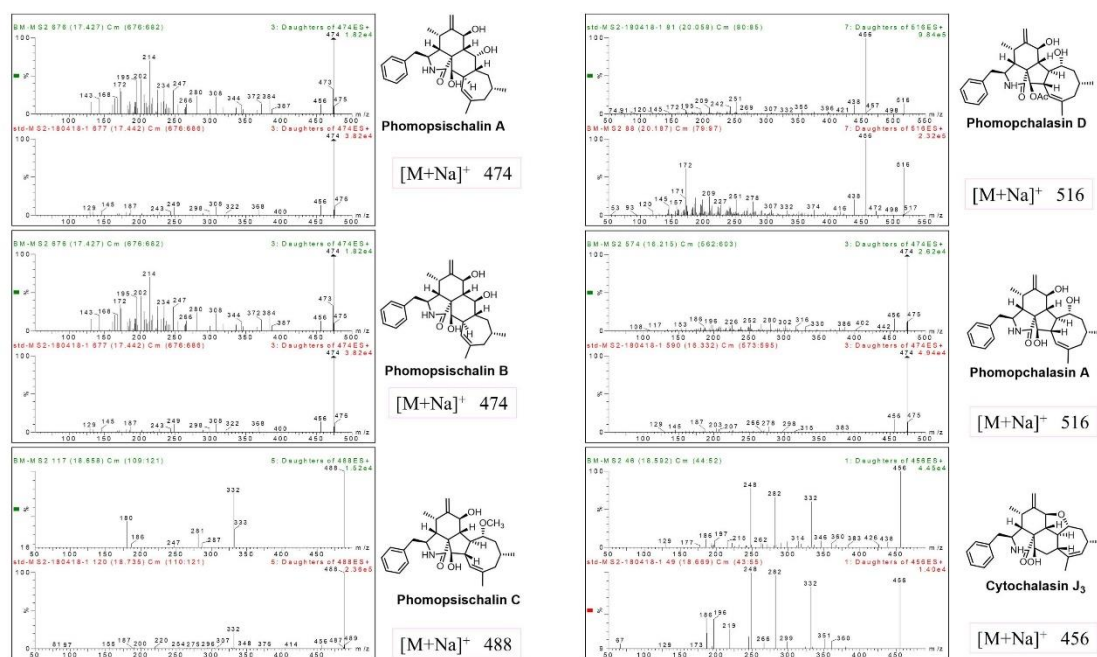

**Figure S44.** LC-MS/MS profiles for phomopsischalins A–C, phomopchalasins A, D, and cytochalasin J<sub>3</sub> (**1–3**) in the EtOAc extracts. (Green: LC-MS/MS result of EtOAc extracts, red: LC-MS/MS result of standards)
